# Supplementary material
Source: publisher figshare collection journal article supplement (https://tandf.figshare.com/ndownloader/files/31595290)
Supplement: Supplementary file 1 [file 31595290]

## Sheet: Sheet1
Data File S2. Global analysis comparing gene expression in amino acid starvation (case2) relative to nitrogen starvation (case1).
GeneID	Length	case1-Expression	case2-Expression	log2FoldChange(case2/case1)	Padj	Up/Down-Regulation	Pvalue	Cellular Component	Molecular Function	Biological Process	Kegg Orthology	Nr Description
BK006935.2_mrna_52	1002	852.577	761.684	-0.162637	0.585775	*	0.368621	GO:0005737//cytoplasm	NA	GO:0002098//tRNA wobble uridine modification;GO:0000226//microtubule cytoskeleton organization;GO:0007017//microtubule-based process;GO:0007117//budding cell bud growth	K15462//protein ATS1	NP_009382.2//Ats1p [Saccharomyces cerevisiae S288C]
BK006947.3_mrna_5003	2925	2574.81	3069.32	0.253453	0.281035	*	0.11994	GO:0070847//core mediator complex;GO:0016592//mediator complex	GO:0001102//RNA polymerase II activating transcription factor binding	GO:0000122//negative regulation of transcription by RNA polymerase II;GO:0070202//regulation of establishment of protein localization to chromosome;GO:0045944//positive regulation of transcription by RNA polymerase II;GO:0051123//RNA polymerase II preinitiation complex assembly	K15160//mediator of RNA polymerase II transcription subunit 16, fungi type	NP_014163.1//Sin4p [Saccharomyces cerevisiae S288C]
BK006949.2_mrna_6295	948	2128.9	2155.73	0.0180669	0.970778	*	0.938608	GO:0005783//endoplasmic reticulum;GO:0016021//integral component of membrane;GO:0005789//endoplasmic reticulum membrane	NA	NA	NA	NP_015439.1//hypothetical protein YPR114W [Saccharomyces cerevisiae S288C]
BK006936.2_mrna_227	1647	1153.98	748.769	-0.62403	0.00896644	*	0.00124555	GO:0005634//nucleus;GO:0005887//integral component of plasma membrane;GO:0016021//integral component of membrane;GO:0071944//cell periphery;GO:0005886//plasma membrane;GO:0005737//cytoplasm	GO:0015238//drug transmembrane transporter activity;GO:0015244//fluconazole transmembrane transporter activity	GO:0015903//fluconazole transport;GO:0006855//drug transmembrane transport	K08158//MFS transporter, DHA1 family, multidrug resistance protein	NP_009562.1//Flr1p [Saccharomyces cerevisiae S288C]
BK006940.2_mrna_1861	1374	6247.14	5375.35	-0.216838	0.633001	*	0.421859	GO:0045298//tubulin complex;GO:0005874//microtubule;GO:0005816//spindle pole body;GO:0005881//cytoplasmic microtubule;GO:0005737//cytoplasm;GO:0005876//spindle microtubule	GO:0005200//structural constituent of cytoskeleton;GO:0005525//GTP binding;GO:0003924//GTPase activity	GO:0098863//nuclear migration by microtubule mediated pushing forces;GO:0071963//establishment or maintenance of cell polarity regulating cell shape;GO:0090316//positive regulation of intracellular protein transport;GO:1903087//mitotic spindle pole body duplication;GO:0007017//microtubule-based process;GO:0048312//intracellular distribution of mitochondria;GO:0031122//cytoplasmic microtubule orga…	K07375//tubulin beta	XP_003680151.1//hypothetical protein TDEL_0C00510 [Torulaspora delbrueckii]
BK006940.2_mrna_1851	2145	9446.61	11452.2	0.277752	0.297655	*	0.13027	GO:0005856//cytoskeleton;GO:0000935//division septum;GO:0005934//cellular bud tip;GO:0005886//plasma membrane;GO:0005737//cytoplasm;GO:0005935//cellular bud neck;GO:0032153//cell division site	GO:0008092//cytoskeletal protein binding;GO:0005096//GTPase activator activity	GO:0007264//small GTPase mediated signal transduction;GO:0035556//intracellular signal transduction	NA	NP_428268.1//Rgd2p [Saccharomyces cerevisiae S288C]
BK006935.2_mrna_76	828	894.017	585.581	-0.610433	0.00978462	*	0.00138213	GO:0000214//tRNA-intron endonuclease complex;GO:0012505//endomembrane system;GO:0005739//mitochondrion;GO:0005741//mitochondrial outer membrane	GO:0016829//lyase activity;GO:0000213//tRNA-intron endonuclease activity;GO:0003676//nucleic acid binding	GO:0000379//tRNA-type intron splice site recognition and cleavage	K15323//tRNA-splicing endonuclease subunit Sen34 [EC:4.6.1.16]	NP_009405.1//tRNA splicing endonuclease subunit SEN34 [Saccharomyces cerevisiae S288C]
BK006939.2_mrna_1581	804	270.781	248.351	-0.12475	0.791995	*	0.62058	GO:0030915//Smc5-Smc6 complex;GO:0005634//nucleus;GO:0005635//nuclear envelope;GO:0005737//cytoplasm	GO:0030291//protein serine/threonine kinase inhibitor activity;GO:0008270//zinc ion binding;GO:0016874//ligase activity;GO:0019789//SUMO transferase activity	GO:0006281//DNA repair;GO:0000724//double-strand break repair via homologous recombination;GO:1990683//DNA double-strand break attachment to nuclear envelope	K22756//E3 SUMO-protein ligase NSE2 [EC:2.3.2.-]	NP_010896.3//SUMO ligase MMS21 [Saccharomyces cerevisiae S288C]
BK006946.2_mrna_4899	714	123.862	131.911	0.0908323	0.915301	*	0.823082	GO:0010494//cytoplasmic stress granule;GO:0000932//P-body	GO:0008233//peptidase activity;GO:0008234//cysteine-type peptidase activity;GO:0051082//unfolded protein binding;GO:0019172//glyoxalase III activity	GO:0031669//cellular response to nutrient levels	K22211//D-lactate dehydratase [EC:4.2.1.130]	NP_014055.1//glutathione-independent methylglyoxalase family protein [Saccharomyces cerevisiae S288C]
BK006949.2_mrna_6032	1356	1705.33	1807.76	0.0841524	0.754201	*	0.566855	GO:0080008//Cul4-RING E3 ubiquitin ligase complex;GO:0005681//spliceosomal complex;GO:0000974//Prp19 complex;GO:0005737//cytoplasm;GO:0071013//catalytic step 2 spliceosome	NA	GO:0000398//mRNA splicing, via spliceosome	K12862//pleiotropic regulator 1	NP_015174.1//mRNA splicing protein PRP46 [Saccharomyces cerevisiae S288C]
BK006943.2_mrna_3103	1710	387.23	310.897	-0.316753	0.263469	*	0.108744	GO:0005887//integral component of plasma membrane;GO:0016021//integral component of membrane;GO:0071944//cell periphery;GO:0005886//plasma membrane	GO:0015149//hexose transmembrane transporter activity;GO:0005353//fructose transmembrane transporter activity;GO:0015578//mannose transmembrane transporter activity;GO:0005355//glucose transmembrane transporter activity;GO:0005351//carbohydrate:proton symporter activity;GO:0022857//transmembrane transporter activity	GO:0008645//hexose transmembrane transport;GO:0098704//carbohydrate import across plasma membrane	K08139//MFS transporter, SP family, sugar:H+ symporter	NP_012321.1//hexose transporter HXT8 [Saccharomyces cerevisiae S288C]
BK006936.2_mrna_278	2700	2078	3000.02	0.529775	0.0139032	*	0.00208956	GO:0005634//nucleus;GO:0046540//U4/U6 x U5 tri-snRNP complex;GO:0071001//U4/U6 snRNP;GO:0071013//catalytic step 2 spliceosome	NA	GO:0000244//spliceosomal tri-snRNP complex assembly;GO:0000398//mRNA splicing, via spliceosome	K12855//pre-mRNA-processing factor 6	NP_009611.1//U4/U6-U5 snRNP complex subunit PRP6 [Saccharomyces cerevisiae S288C]
BK006938.2_mrna_1485	432	6546.2	8061.18	0.300333	0.202674	*	0.0742516	GO:0005634//nucleus;GO:0005623//cell;GO:0005829//cytosol;GO:0016021//integral component of membrane;GO:0005739//mitochondrion	GO:0015035//protein disulfide oxidoreductase activity;GO:0004364//glutathione transferase activity;GO:0009055//electron transfer activity;GO:0015036//disulfide oxidoreductase activity;GO:0004602//glutathione peroxidase activity;GO:0004362//glutathione-disulfide reductase activity	GO:0006749//glutathione metabolic process;GO:0034599//cellular response to oxidative stress;GO:0045454//cell redox homeostasis	K03676//glutaredoxin 3	NP_010801.1//dithiol glutaredoxin GRX2 [Saccharomyces cerevisiae S288C]
BK006942.2_mrna_2940	1278	1302.26	1828.71	0.489812	0.0318924	*	0.00598884	GO:0005737//cytoplasm	GO:0016740//transferase activity	GO:0017183//peptidyl-diphthamide biosynthetic process from peptidyl-histidine	K07561//2-(3-amino-3-carboxypropyl)histidine synthase [EC:2.5.1.108]	NP_012163.1//Dph1p [Saccharomyces cerevisiae S288C]
BK006936.2_mrna_495	1473	4567.63	3652.51	-0.322559	0.214617	*	0.0802795	GO:0005739//mitochondrion	GO:0004372//glycine hydroxymethyltransferase activity;GO:0016597//amino acid binding;GO:0008168//methyltransferase activity;GO:0008270//zinc ion binding;GO:0030170//pyridoxal phosphate binding;GO:0070905//serine binding;GO:0050897//cobalt ion binding	GO:1904482//cellular response to tetrahydrofolate;GO:0006565//L-serine catabolic process;GO:0046653//tetrahydrofolate metabolic process;GO:0006730//one-carbon metabolic process;GO:0006544//glycine metabolic process;GO:0035999//tetrahydrofolate interconversion;GO:0019264//glycine biosynthetic process from serine;GO:0009070//serine family amino acid biosynthetic process;GO:0046655//folic acid metab…	K00600//glycine hydroxymethyltransferase [EC:2.1.2.1]	EGA87988.1//Shm1p [Saccharomyces cerevisiae VL3]
BK006948.2_mrna_5360	1134	4068.7	888.202	-2.19561	6.93377e-14	Down	2.22809e-15	GO:0034399//nuclear periphery;GO:0005829//cytosol;GO:0005737//cytoplasm	GO:0030060//L-malate dehydrogenase activity	GO:0006099//tricarboxylic acid cycle;GO:0006094//gluconeogenesis;GO:0005975//carbohydrate metabolic process;GO:0016558//protein import into peroxisome matrix;GO:0006108//malate metabolic process	K00026//malate dehydrogenase [EC:1.1.1.37]	AAC49466.1//malate dehydrogenase [Saccharomyces cerevisiae]
BK006943.2_mrna_3447	1347	886.239	1475.79	0.735719	0.00128819	*	0.000132376	GO:0000329//fungal-type vacuole membrane;GO:0016021//integral component of membrane	GO:0005524//ATP binding	GO:0055085//transmembrane transport	K13950//para-aminobenzoate synthetase [EC:2.6.1.85]	NP_012658.3//hypothetical protein YJR124C [Saccharomyces cerevisiae S288C]
BK006940.2_mrna_1868	717	3981.29	4563.8	0.197	0.525773	*	0.310888	GO:0005634//nucleus	GO:0000981//DNA-binding transcription factor activity, RNA polymerase II-specific;GO:0003677//DNA binding;GO:0003700//DNA-binding transcription factor activity	GO:0006990//positive regulation of transcription from RNA polymerase II promoter involved in unfolded protein response;GO:0045944//positive regulation of transcription by RNA polymerase II;GO:0034976//response to endoplasmic reticulum stress;GO:0010674//negative regulation of transcription from RNA polymerase II promoter involved in meiotic cell cycle;GO:0030968//endoplasmic reticulum unfolded pr…	K16230//transcriptional activator HAC1	NP_116622.1//transcription factor HAC1 [Saccharomyces cerevisiae S288C]
BK006946.2_mrna_4839	933	1602.49	1830.34	0.191792	0.506095	*	0.293408	GO:0005576//extracellular region;GO:0005739//mitochondrion;GO:0005737//cytoplasm	GO:0000287//magnesium ion binding;GO:0004427//inorganic diphosphatase activity	GO:0006796//phosphate-containing compound metabolic process;GO:0009060//aerobic respiration	K01507//inorganic pyrophosphatase [EC:3.6.1.1]	NP_013994.1//inorganic diphosphatase PPA2 [Saccharomyces cerevisiae S288C]
BK006943.2_mrna_3254	1335	25399.9	30116.5	0.245727	0.398211	*	0.199205	GO:0005739//mitochondrion;GO:0005737//cytoplasm	GO:0047536//2-aminoadipate transaminase activity;GO:0003824//catalytic activity;GO:0016212//kynurenine-oxoglutarate transaminase activity;GO:0030170//pyridoxal phosphate binding	GO:0009058//biosynthetic process;GO:0034276//kynurenic acid biosynthetic process;GO:0097053//L-kynurenine catabolic process	K14264//kynurenine aminotransferase [EC:2.6.1.7]	NP_012475.3//kynurenine--oxoglutarate transaminase [Saccharomyces cerevisiae S288C]
BK006938.2_mrna_1503	384	7538.36	9710.85	0.365346	0.321882	*	0.144914	GO:0005750//mitochondrial respiratory chain complex III;GO:0016021//integral component of membrane;GO:0005739//mitochondrion	GO:0008121//ubiquinol-cytochrome-c reductase activity	GO:0034551//mitochondrial respiratory chain complex III assembly;GO:0009060//aerobic respiration;GO:0006122//mitochondrial electron transport, ubiquinol to cytochrome c	K00417//ubiquinol-cytochrome c reductase subunit 7	NP_010818.1//ubiquinol--cytochrome-c reductase subunit 7 [Saccharomyces cerevisiae S288C]
BK006949.2_mrna_6308	1038	1708.89	2228.69	0.383132	0.0822425	*	0.0211082	GO:0005634//nucleus;GO:0005737//cytoplasm	GO:0050236//pyridoxine:NADP 4-dehydrogenase activity	GO:0042820//vitamin B6 catabolic process	K05275//pyridoxine 4-dehydrogenase [EC:1.1.1.65]	NP_015452.1//pyridoxine 4-dehydrogenase [Saccharomyces cerevisiae S288C]
BK006944.2_mrna_3708	294	578.435	696.675	0.26833	0.275383	*	0.116283	GO:0000138//Golgi trans cisterna;GO:0030173//integral component of Golgi membrane;GO:0031201//SNARE complex	GO:0005484//SNAP receptor activity	GO:0006906//vesicle fusion;GO:0015031//protein transport;GO:0006891//intra-Golgi vesicle-mediated transport	K08505//protein transport protein SFT1	NP_012919.3//Sft1p [Saccharomyces cerevisiae S288C]
BK006943.2_mrna_3265	3222	1211.97	988.459	-0.294095	0.179169	*	0.061562	GO:0005634//nucleus;GO:0031499//TRAMP complex;GO:0005730//nucleolus	GO:0008143//poly(A) binding;GO:0003723//RNA binding;GO:0003729//mRNA binding;GO:0034459//ATP-dependent 3'-5' RNA helicase activity;GO:0004004//ATP-dependent RNA helicase activity;GO:0005524//ATP binding;GO:0003724//RNA helicase activity;GO:0016491//oxidoreductase activity	GO:0006401//RNA catabolic process;GO:0016075//rRNA catabolic process;GO:0034476//U5 snRNA 3'-end processing;GO:0071049//nuclear retention of pre-mRNA with aberrant 3'-ends at the site of transcription;GO:0000467//exonucleolytic trimming to generate mature 3'-end of 5.8S rRNA from tricistronic rRNA transcript (SSU-rRNA, 5.8S rRNA, LSU-rRNA);GO:0016973//poly(A)+ mRNA export from nucleus;GO:0071035/…	K12598//ATP-dependent RNA helicase DOB1 [EC:3.6.4.13]	NP_012485.1//ATP-dependent RNA helicase MTR4 [Saccharomyces cerevisiae S288C]
BK006949.2_mrna_6063	264	20.468	16.3734	-0.322018	0.656965	*	0.449187	GO:0016021//integral component of membrane	NA	NA	NA	NP_878181.1//hypothetical protein YPL119C-A [Saccharomyces cerevisiae S288C]
BK006942.2_mrna_2870	1770	31.4506	29.0955	-0.112291	0.899683	*	0.796539	GO:0005737//cytoplasm	GO:0032450//maltose alpha-glucosidase activity;GO:0004556//alpha-amylase activity;GO:0004575//sucrose alpha-glucosidase activity;GO:0003824//catalytic activity;GO:0033934//glucan 1,4-alpha-maltotriohydrolase activity;GO:0004574//oligo-1,6-glucosidase activity	GO:0009313//oligosaccharide catabolic process;GO:0046352//disaccharide catabolic process;GO:0005975//carbohydrate metabolic process;GO:0005987//sucrose catabolic process;GO:0000025//maltose catabolic process	K01182//oligo-1,6-glucosidase [EC:3.2.1.10]	NP_012096.1//oligo-1,6-glucosidase IMA3 [Saccharomyces cerevisiae S288C]
BK006947.3_mrna_5097	345	3704.55	3381.23	-0.13175	0.728942	*	0.535704	GO:0005634//nucleus;GO:0005739//mitochondrion;GO:0005737//cytoplasm	GO:0003755//peptidyl-prolyl cis-trans isomerase activity;GO:0005527//macrolide binding	GO:1901710//regulation of homoserine biosynthetic process;GO:0006457//protein folding;GO:0006325//chromatin organization;GO:0000413//protein peptidyl-prolyl isomerization;GO:0061077//chaperone-mediated protein folding	K09568//FK506-binding protein 1 [EC:5.2.1.8]	NP_014264.1//peptidylprolyl isomerase FPR1 [Saccharomyces cerevisiae S288C]
BK006941.2_mrna_2172	369	814.213	1043.88	0.358473	0.164933	*	0.0549594	GO:0005665//RNA polymerase II, core complex;GO:0005730//nucleolus	GO:0003899//DNA-directed 5'-3' RNA polymerase activity;GO:0008270//zinc ion binding;GO:0003968//RNA-directed 5'-3' RNA polymerase activity;GO:0003676//nucleic acid binding	GO:0006283//transcription-coupled nucleotide-excision repair;GO:0006351//transcription, DNA-templated;GO:0001193//maintenance of transcriptional fidelity during DNA-templated transcription elongation from RNA polymerase II promoter;GO:0001172//transcription, RNA-templated;GO:0006366//transcription by RNA polymerase II;GO:0006379//mRNA cleavage;GO:0006367//transcription initiation from RNA polymer…	K03017//DNA-directed RNA polymerase II subunit RPB9	NP_011445.1//DNA-directed RNA polymerase II core subunit RPB9 [Saccharomyces cerevisiae S288C]
BK006945.2_rrna_4067	119	0.327064	0.32719	0.000555443	0.998165	*	0.99783	NA	NA	NA	NA	NP_878122.1//hypothetical protein YLR157C-C [Saccharomyces cerevisiae S288C]
BK006943.2_mrna_3259	738	5725.73	5597	-0.0328058	0.935304	*	0.865176	GO:0005634//nucleus;GO:0005829//cytosol;GO:0005737//cytoplasm	GO:0016799//hydrolase activity, hydrolyzing N-glycosyl compounds	GO:0014074//response to purine-containing compound;GO:0009691//cytokinin biosynthetic process	K22522//cytokinin riboside 5'-monophosphate phosphoribohydrolase [EC:3.2.2.-];K12608//CCR4-NOT complex subunit CAF16	NP_012480.1//hypothetical protein YJL055W [Saccharomyces cerevisiae S288C]
BK006946.2_mrna_4749	2946	1410.76	1413.21	0.00249957	0.993369	*	0.988297	GO:0005623//cell;GO:0005622//intracellular;GO:0005737//cytoplasm	NA	GO:0006606//protein import into nucleus	NA	NP_013910.1//Rtp1p [Saccharomyces cerevisiae S288C]
BK006943.2_ncrna_3210	386	32.9367	58.3721	0.825582	0.0588341	*	0.0134703	NA	NA	NA	NA	NA
BK006940.2_mrna_1895	6432	3957.33	2614.05	-0.598238	0.0294637	*	0.00543415	GO:0005634//nucleus;GO:0005829//cytosol;GO:0016021//integral component of membrane;GO:0034515//proteasome storage granule	GO:0016504//peptidase activator activity;GO:0070628//proteasome binding;GO:0070577//lysine-acetylated histone binding	GO:1990237//sequestration of proteasome core complex in proteasome storage granule;GO:0043248//proteasome assembly;GO:0006281//DNA repair;GO:0010499//proteasomal ubiquitin-independent protein catabolic process;GO:0043486//histone exchange;GO:0006974//cellular response to DNA damage stimulus;GO:0061136//regulation of proteasomal protein catabolic process;GO:1990236//proteasome core complex import …	K06699//proteasome activator subunit 4	NP_116648.2//Blm10p [Saccharomyces cerevisiae S288C]
BK006938.2_mrna_958	123	10.6721	8.59627	-0.31206	0.726105	*	0.532142	NA	NA	NA	NA	NP_878061.3//hypothetical protein YDR003W-A [Saccharomyces cerevisiae S288C]
BK006939.2_mrna_1804	1641	2070.04	2251.43	0.121188	0.70628	*	0.507339	GO:0005759//mitochondrial matrix;GO:0005634//nucleus;GO:0005739//mitochondrion;GO:0005737//cytoplasm	GO:0003723//RNA binding;GO:0052927//CTP:tRNA cytidylyltransferase activity;GO:0005524//ATP binding;GO:0004810//tRNA adenylyltransferase activity;GO:0016779//nucleotidyltransferase activity;GO:0052928//CTP:3'-cytidine-tRNA cytidylyltransferase activity;GO:0052929//ATP:3'-cytidine-cytidine-tRNA adenylyltransferase activity	GO:0006396//RNA processing;GO:0001680//tRNA 3'-terminal CCA addition	K00974//tRNA nucleotidyltransferase (CCA-adding enzyme) [EC:2.7.7.72 3.1.3.- 3.1.4.-]	NP_011095.1//tRNA adenylyltransferase [Saccharomyces cerevisiae S288C]
BK006938.2_mrna_1313	570	1187.82	1478.66	0.315969	0.269513	*	0.112451	GO:0005654//nucleoplasm;GO:0032040//small-subunit processome;GO:0005730//nucleolus	GO:0004521//endoribonuclease activity	GO:0031167//rRNA methylation;GO:0000472//endonucleolytic cleavage to generate mature 5'-end of SSU-rRNA from (SSU-rRNA, 5.8S rRNA, LSU-rRNA);GO:0000447//endonucleolytic cleavage in ITS1 to separate SSU-rRNA from 5.8S rRNA and LSU-rRNA from tricistronic rRNA transcript (SSU-rRNA, 5.8S rRNA, LSU-rRNA);GO:0000480//endonucleolytic cleavage in 5'-ETS of tricistronic rRNA transcript (SSU-rRNA, 5.8S rRN…	K14566//U3 small nucleolar RNA-associated protein 24	NP_010626.1//rRNA-processing protein FCF1 [Saccharomyces cerevisiae S288C]
BK006945.2_mrna_4132	681	1539.79	1609.76	0.0641182	0.842526	*	0.707581	GO:0005774//vacuolar membrane;GO:0034271//phosphatidylinositol 3-kinase complex, class III, type I;GO:0000407//phagophore assembly site;GO:0034045//phagophore assembly site membrane;GO:0005737//cytoplasm	GO:0042802//identical protein binding;GO:0005198//structural molecule activity	GO:0016236//macroautophagy	K21145//autophagy-related protein 38	NP_013312.2//Atg38p [Saccharomyces cerevisiae S288C]
BK006936.2_mrna_314	924	138.069	174.192	0.335285	0.407211	*	0.205889	GO:0005743//mitochondrial inner membrane;GO:0016021//integral component of membrane;GO:0005739//mitochondrion	GO:0005471//ATP:ADP antiporter activity;GO:0042802//identical protein binding;GO:0022857//transmembrane transporter activity	GO:0055085//transmembrane transport;GO:0015886//heme transport;GO:0009061//anaerobic respiration	K05863//solute carrier family 25 (mitochondrial adenine nucleotide translocator), member 4/5/6/31	NP_009642.3//ADP/ATP carrier protein AAC3 [Saccharomyces cerevisiae S288C]
BK006943.2_mrna_3473	1131	11854.6	6209.5	-0.932898	5.83877e-07	*	3.2443e-08	GO:0005737//cytoplasm	GO:0052654//L-leucine transaminase activity;GO:0052656//L-isoleucine transaminase activity;GO:0052655//L-valine transaminase activity	GO:0009083//branched-chain amino acid catabolic process;GO:0009082//branched-chain amino acid biosynthetic process	K00826//branched-chain amino acid aminotransferase [EC:2.6.1.42]	XP_018221445.1//BAT2-like protein [Saccharomyces eubayanus]
BK006941.2_mrna_2229	2667	1948.78	1406.11	-0.470858	0.296142	*	0.129064	GO:0005737//cytoplasm	GO:0003723//RNA binding;GO:0003729//mRNA binding	GO:0017148//negative regulation of translation;GO:0008104//protein localization;GO:0000288//nuclear-transcribed mRNA catabolic process, deadenylation-dependent decay;GO:0001308//negative regulation of chromatin silencing involved in replicative cell aging	K17944//mRNA-binding protein PUF3	NP_011501.1//Puf4p [Saccharomyces cerevisiae S288C]
BK006948.2_mrna_5617	1305	5482.67	4962.42	-0.143837	0.59115	*	0.377545	GO:0005634//nucleus;GO:0005737//cytoplasm;GO:0008540//proteasome regulatory particle, base subcomplex	GO:0008233//peptidase activity;GO:0005524//ATP binding;GO:0036402//proteasome-activating ATPase activity;GO:0016887//ATPase activity	GO:0070682//proteasome regulatory particle assembly;GO:0006511//ubiquitin-dependent protein catabolic process;GO:0045899//positive regulation of RNA polymerase II transcriptional preinitiation complex assembly;GO:0030163//protein catabolic process	K03065//26S proteasome regulatory subunit T5	NP_014760.3//proteasome regulatory particle base subunit RPT5 [Saccharomyces cerevisiae S288C]
BK006934.2_mrna_2809	339	77.0557	74.5946	-0.0468293	0.935763	*	0.866509	GO:0000324//fungal-type vacuole	NA	NA	NA	NP_001257667.1//hypothetical protein YHR173C [Saccharomyces cerevisiae S288C]
BK006938.2_mrna_857	1434	2618.62	2807.33	0.100394	0.666689	*	0.46095	GO:0005634//nucleus;GO:0005737//cytoplasm	GO:0003977//UDP-N-acetylglucosamine diphosphorylase activity;GO:0070569//uridylyltransferase activity	GO:0006048//UDP-N-acetylglucosamine biosynthetic process	K00972//UDP-N-acetylglucosamine/UDP-N-acetylgalactosamine diphosphorylase [EC:2.7.7.23 2.7.7.83]	NP_010180.1//UDP-N-acetylglucosamine diphosphorylase [Saccharomyces cerevisiae S288C]
BK006946.2_mrna_4412	1518	695.889	514.698	-0.435131	0.0739731	*	0.0181126	NA	GO:0004535//poly(A)-specific ribonuclease activity;GO:0004519//endonuclease activity	GO:0043633//polyadenylation-dependent RNA catabolic process	K14812//RNA exonuclease NGL2 [EC:3.1.-.-]	NP_013588.1//3'-5' poly(A) RNA exonuclease [Saccharomyces cerevisiae S288C]
BK006938.2_mrna_890	690	1243.49	1303.8	0.0683286	0.872867	*	0.751177	GO:0005761//mitochondrial ribosome;GO:0031314//extrinsic component of mitochondrial inner membrane;GO:0005739//mitochondrion	GO:0045182//translation regulator activity	GO:0034551//mitochondrial respiratory chain complex III assembly;GO:0070131//positive regulation of mitochondrial translation	K17664//cytochrome b translational activator protein CBS1, mitochondrial	CAA33676.1//unnamed protein product [Saccharomyces cerevisiae]
BK006934.2_mrna_2601	963	2264.56	2077.86	-0.124128	0.725331	*	0.529967	GO:0002189//ribose phosphate diphosphokinase complex;GO:0005737//cytoplasm	GO:0000287//magnesium ion binding;GO:0004749//ribose phosphate diphosphokinase activity;GO:0005524//ATP binding;GO:0016301//kinase activity	GO:0009116//nucleoside metabolic process;GO:0008361//regulation of cell size;GO:0009165//nucleotide biosynthetic process;GO:0009156//ribonucleoside monophosphate biosynthetic process;GO:0006164//purine nucleotide biosynthetic process;GO:0031505//fungal-type cell wall organization;GO:0006015//5-phosphoribose 1-diphosphate biosynthetic process	K00948//ribose-phosphate pyrophosphokinase [EC:2.7.6.1]	NP_011852.1//ribose phosphate diphosphokinase subunit PRS3 [Saccharomyces cerevisiae S288C]
BK006945.2_mrna_4040	2757	2434.1	2812.54	0.208488	0.426134	*	0.221305	GO:0005768//endosome;GO:0000329//fungal-type vacuole membrane;GO:0030897//HOPS complex;GO:0005623//cell;GO:0005829//cytosol;GO:0000306//extrinsic component of vacuolar membrane;GO:0033263//CORVET complex	GO:0004180//carboxypeptidase activity;GO:0046872//metal ion binding;GO:0030674//protein binding, bridging	GO:0006895//Golgi to endosome transport;GO:0006904//vesicle docking involved in exocytosis;GO:0042144//vacuole fusion, non-autophagic;GO:0045324//late endosome to vacuole transport;GO:0016192//vesicle-mediated transport;GO:0006886//intracellular protein transport;GO:0099022//vesicle tethering;GO:0007033//vacuole organization;GO:0007032//endosome organization;GO:0035542//regulation of SNARE comple…	K20181//vacuolar protein sorting-associated protein 18	NP_013249.1//tethering complex subunit PEP3 [Saccharomyces cerevisiae S288C]
BK006945.2_mrna_4029	2958	7012.34	4698.44	-0.577715	0.0295117	*	0.00544794	GO:0005783//endoplasmic reticulum;GO:0045121//membrane raft;GO:0016021//integral component of membrane;GO:0005886//plasma membrane	GO:0015385//sodium:proton antiporter activity;GO:0015079//potassium ion transmembrane transporter activity;GO:0015491//cation:cation antiporter activity	GO:0097623//potassium ion export across plasma membrane;GO:0030004//cellular monovalent inorganic cation homeostasis;GO:0030007//cellular potassium ion homeostasis;GO:0006970//response to osmotic stress;GO:0036376//sodium ion export across plasma membrane	K03316//monovalent cation:H+ antiporter, CPA1 family	NP_013239.1//Nha1p [Saccharomyces cerevisiae S288C]
BK006938.2_mrna_1028	675	2710.44	3014.41	0.153351	0.623856	*	0.412006	GO:0005737//cytoplasm	GO:0004725//protein tyrosine phosphatase activity	NA	K18046//tyrosine-protein phosphatase OCA6 [EC:3.1.3.48]	NP_010352.1//protein-tyrosine-phosphatase [Saccharomyces cerevisiae S288C]
BK006941.2_mrna_2298	363	8.27037	5.61007	-0.559932	0.48563	*	0.272765	GO:0016021//integral component of membrane	NA	NA	NA	NP_001335782.1//hypothetical protein YGR045C [Saccharomyces cerevisiae S288C]
BK006938.2_mrna_1343	399	990.693	627.75	-0.658247	0.0204993	*	0.00341369	GO:0016021//integral component of membrane	NA	NA	NA	NP_010654.3//hypothetical protein YDR366C [Saccharomyces cerevisiae S288C]
BK006946.2_mrna_4532	2325	3293.21	2386.49	-0.464604	0.0348307	*	0.00682624	GO:0071944//cell periphery;GO:0005886//plasma membrane;GO:0005737//cytoplasm	NA	GO:0035556//intracellular signal transduction;GO:0006873//cellular ion homeostasis	K11294//nucleolin;K03685//ribonuclease III [EC:3.1.26.3]	NP_013708.1//Gis4p [Saccharomyces cerevisiae S288C]
BK006938.2_mrna_1425	1062	2695.73	2851.7	0.0811471	0.828003	*	0.675845	GO:0005634//nucleus;GO:0000790//nuclear chromatin	GO:0000977//RNA polymerase II regulatory region sequence-specific DNA binding;GO:0043565//sequence-specific DNA binding	GO:0000122//negative regulation of transcription by RNA polymerase II;GO:0071930//negative regulation of transcription involved in G1/S transition of mitotic cell cycle;GO:0006355//regulation of transcription, DNA-templated	K12411//homeobox protein YOX1/YHP1	NP_010739.3//Yhp1p [Saccharomyces cerevisiae S288C]
BK006939.2_mrna_1523	1509	119.335	154.144	0.369257	0.422681	*	0.218058	NA	GO:0046029//mannitol dehydrogenase activity;GO:0016491//oxidoreductase activity;GO:0050662//coenzyme binding	GO:0019594//mannitol metabolic process	K00045//mannitol 2-dehydrogenase [EC:1.1.1.67]	NP_010844.1//mannitol dehydrogenase DSF1 [Saccharomyces cerevisiae S288C]
BK006934.2_mrna_2813	1299	6610.58	9188.81	0.475101	0.232026	*	0.089859	GO:0005829//cytosol;GO:0005789//endoplasmic reticulum membrane	GO:0050661//NADP binding;GO:0004499//N,N-dimethylaniline monooxygenase activity;GO:0050660//flavin adenine dinucleotide binding	GO:0006457//protein folding	K00485//dimethylaniline monooxygenase (N-oxide forming) [EC:1.14.13.8]	NP_012046.4//N,N-dimethylaniline monooxygenase [Saccharomyces cerevisiae S288C]
BK006934.2_mrna_2849	876	2223.14	2815.05	0.340562	0.049706	*	0.0109121	GO:0005737//cytoplasm	GO:0008757//S-adenosylmethionine-dependent methyltransferase activity;GO:0003729//mRNA binding;GO:0008168//methyltransferase activity	GO:0055088//lipid homeostasis	K22438//trans-aconitate 3-methyltransferase [EC:2.1.1.145]	EDZ71604.1//YHR209Wp-like protein [Saccharomyces cerevisiae AWRI1631]
BK006938.2_mrna_1034	510	551.32	537.519	-0.0365734	0.93527	*	0.864623	GO:0005634//nucleus;GO:0005829//cytosol;GO:0016514//SWI/SNF complex	NA	GO:0045944//positive regulation of transcription by RNA polymerase II	K11774//SWI/SNF complex component SNF11	NP_010358.3//Snf11p [Saccharomyces cerevisiae S288C]
BK006941.2_mrna_2320	1761	1028.9	704.261	-0.546914	0.117968	*	0.0343933	GO:0005829//cytosol	GO:0031625//ubiquitin protein ligase binding	GO:0070086//ubiquitin-dependent endocytosis	K20062//arrestin-related trafficking adapter 4/5/7	NP_011582.1//Art5p [Saccharomyces cerevisiae S288C]
BK006949.2_mrna_6069	1191	843.836	854.337	0.0178434	0.969514	*	0.935447	GO:0005829//cytosol	GO:0016616//oxidoreductase activity, acting on the CH-OH group of donors, NAD or NADP as acceptor;GO:0051287//NAD binding;GO:0042803//protein homodimerization activity;GO:0016618//hydroxypyruvate reductase activity;GO:0030267//glyoxylate reductase (NADP) activity	GO:0055114//oxidation-reduction process	K00015//glyoxylate reductase [EC:1.1.1.26]	NP_015212.1//glyoxylate reductase [Saccharomyces cerevisiae S288C]
BK006937.2_mrna_580	1902	581.553	708.486	0.284827	0.669545	*	0.46504	GO:0016021//integral component of membrane	GO:0022857//transmembrane transporter activity	GO:0006865//amino acid transport	K16261//yeast amino acid transporter	EEU06087.1//Agp1p [Saccharomyces cerevisiae JAY291]
BK006942.2_mrna_3069	4104	242.57	239.082	-0.0208946	0.970729	*	0.937888	GO:0000324//fungal-type vacuole;GO:0005618//cell wall;GO:0005576//extracellular region;GO:0005886//plasma membrane;GO:0005935//cellular bud neck;GO:0031225//anchored component of membrane	GO:0042802//identical protein binding	GO:0007124//pseudohyphal growth;GO:0036281//coflocculation;GO:0000128//flocculation;GO:0030447//filamentous growth;GO:0098609//cell-cell adhesion;GO:0001403//invasive growth in response to glucose limitation;GO:0044011//single-species biofilm formation on inanimate substrate;GO:0043709//cell adhesion involved in single-species biofilm formation;GO:0090606//single-species surface biofilm formation	K19851//flocculation protein FLO11;K22016//mucin-3/17	NP_012284.3//Flo11p [Saccharomyces cerevisiae S288C]
BK006941.2_mrna_1989	726	3353.35	2153.71	-0.63878	3.10671e-05	*	2.26179e-06	GO:0005634//nucleus;GO:0005737//cytoplasm	NA	GO:0006311//meiotic gene conversion;GO:0007131//reciprocal meiotic recombination	NA	NP_011264.2//Rmr1p [Saccharomyces cerevisiae S288C]
BK006948.2_mrna_5389	3246	2294.08	2994.42	0.38436	0.0734575	*	0.0179617	GO:0005634//nucleus;GO:0005938//cell cortex	GO:0004674//protein serine/threonine kinase activity;GO:0005524//ATP binding;GO:0004672//protein kinase activity	GO:0032511//late endosome to vacuole transport via multivesicular body sorting pathway;GO:0060211//regulation of nuclear-transcribed mRNA poly(A) tail shortening;GO:0006468//protein phosphorylation;GO:0035556//intracellular signal transduction;GO:0000196//cell wall integrity MAPK cascade;GO:0018105//peptidyl-serine phosphorylation;GO:0010606//positive regulation of cytoplasmic mRNA processing bod…	K06276//3-phosphoinositide dependent protein kinase-1 [EC:2.7.11.1]	NP_014541.1//serine/threonine protein kinase PKH2 [Saccharomyces cerevisiae S288C]
BK006941.2_mrna_2011	1734	9252.34	8010.99	-0.207838	0.334412	*	0.154341	GO:0005783//endoplasmic reticulum;GO:0005739//mitochondrion	NA	GO:0030476//ascospore wall assembly;GO:0030435//sporulation resulting in formation of a cellular spore	NA	NP_011286.1//She10p [Saccharomyces cerevisiae S288C]
BK006938.2_mrna_1347	1329	1976.88	2639.28	0.416919	0.133358	*	0.0405765	GO:0005737//cytoplasm	GO:0003723//RNA binding;GO:0046872//metal ion binding;GO:0008409//5'-3' exonuclease activity;GO:0000166//nucleotide binding	GO:0000290//deadenylation-dependent decapping of nuclear-transcribed mRNA	NA	NP_010658.3//Dxo1p [Saccharomyces cerevisiae S288C]
BK006948.2_mrna_5453	321	1203.3	5477.65	2.18656	1.4242e-23	Up	2.14524e-25	GO:0005840//ribosome;GO:0022625//cytosolic large ribosomal subunit	GO:0003735//structural constituent of ribosome	GO:0002181//cytoplasmic translation;GO:0006414//translational elongation	K02943//large subunit ribosomal protein LP2	XP_018221749.1//RPP2A-like protein [Saccharomyces eubayanus]
BK006938.2_mrna_1386	3870	6905.75	8287.02	0.263056	0.36222	*	0.173805	GO:0005829//cytosol;GO:1990071//TRAPPII protein complex;GO:0005802//trans-Golgi network;GO:0005769//early endosome	GO:0017112//Rab guanyl-nucleotide exchange factor activity	GO:0043087//regulation of GTPase activity;GO:0034498//early endosome to Golgi transport;GO:0006891//intra-Golgi vesicle-mediated transport	K20306//trafficking protein particle complex subunit 9	NP_010695.1//Trs120p [Saccharomyces cerevisiae S288C]
BK006934.2_mrna_2572	1893	2566.78	4018.01	0.64652	0.0074044	*	0.000978992	GO:0005739//mitochondrion	GO:0003723//RNA binding	GO:0090615//mitochondrial mRNA processing;GO:0000372//Group I intron splicing	K17661//cytochrome b pre-mRNA-processing protein 2	NP_011825.1//Cbp2p [Saccharomyces cerevisiae S288C]
BK006947.3_mrna_5230	2031	3956.22	4981.9	0.332574	0.194841	*	0.069204	GO:0097658//Asi complex;GO:0034399//nuclear periphery;GO:0005637//nuclear inner membrane;GO:0016021//integral component of membrane	GO:0046872//metal ion binding;GO:0016874//ligase activity;GO:0004842//ubiquitin-protein transferase activity	GO:0006511//ubiquitin-dependent protein catabolic process;GO:0036369//transcription factor catabolic process;GO:0071230//cellular response to amino acid stimulus	NA	NP_014390.2//putative ubiquitin-protein ligase ASI3 [Saccharomyces cerevisiae S288C]
BK006941.2_mrna_2096	2058	1682.82	2114.72	0.329589	0.348553	*	0.164447	GO:0005634//nucleus;GO:0005737//cytoplasm	GO:0047372//acylglycerol lipase activity	GO:0016042//lipid catabolic process;GO:0044255//cellular lipid metabolic process	K13024//inositol-hexakisphosphate/diphosphoinositol-pentakisphosphate 1-kinase [EC:2.7.4.24]	NP_011371.1//putative lipase ROG1 [Saccharomyces cerevisiae S288C]
BK006947.3_mrna_5249	2631	2018.51	1126.08	-0.84198	0.00274019	*	0.000308185	GO:0071006//U2-type catalytic step 1 spliceosome;GO:0005681//spliceosomal complex	GO:0003723//RNA binding;GO:0034459//ATP-dependent 3'-5' RNA helicase activity;GO:0005524//ATP binding;GO:0004386//helicase activity;GO:0003676//nucleic acid binding;GO:0008186//RNA-dependent ATPase activity	GO:0000349//generation of catalytic spliceosome for first transesterification step;GO:0034247//snoRNA splicing	K12814//pre-mRNA-splicing factor ATP-dependent RNA helicase-like protein PRP2 [EC:3.6.4.13]	NP_014408.1//DEAH-box RNA-dependent ATPase PRP2 [Saccharomyces cerevisiae S288C]
BK006944.2_mrna_3659	261	541.861	570.266	0.0737136	0.832865	*	0.688427	GO:0005634//nucleus;GO:0005758//mitochondrial intermembrane space;GO:0005739//mitochondrion;GO:0005737//cytoplasm	NA	GO:0045332//phospholipid translocation;GO:0015914//phospholipid transport;GO:0033108//mitochondrial respiratory chain complex assembly;GO:0007005//mitochondrion organization	K17968//TRIAP1/MDM35 family protein	NP_012870.1//Mdm35p [Saccharomyces cerevisiae S288C]
BK006934.2_mrna_2594	1599	1650.83	2459.39	0.575107	0.00617987	*	0.000787093	GO:0005794//Golgi apparatus;GO:0016021//integral component of membrane	NA	NA	NA	NP_011846.1//hypothetical protein YHL017W [Saccharomyces cerevisiae S288C]
BK006938.2_mrna_1033	1584	2984.28	4025.47	0.431771	0.0383728	*	0.007803	GO:0016021//integral component of membrane;GO:0070916//inositol phosphoceramide synthase complex	GO:0016740//transferase activity;GO:0045140//inositol phosphoceramide synthase activity;GO:0016772//transferase activity, transferring phosphorus-containing groups	GO:0006676//mannosyl diphosphorylinositol ceramide metabolic process;GO:0006673//inositol phosphoceramide metabolic process;GO:0030148//sphingolipid biosynthetic process	K22725//mannosylinositol phosphoceramide inositolphosphotransferase [EC:2.7.1.-]	NP_010357.3//inositolphosphotransferase [Saccharomyces cerevisiae S288C]
BK006949.2_mrna_6252	636	1236.79	1592.92	0.365067	0.237519	*	0.0928211	GO:0005783//endoplasmic reticulum;GO:0016021//integral component of membrane;GO:0071944//cell periphery;GO:0005789//endoplasmic reticulum membrane	NA	NA	NA	NP_015396.1//hypothetical protein YPR071W [Saccharomyces cerevisiae S288C]
BK006941.2_mrna_2251	972	3552.34	2678.73	-0.407219	0.0083243	*	0.00112988	GO:0005634//nucleus;GO:0005737//cytoplasm	GO:0004306//ethanolamine-phosphate cytidylyltransferase activity;GO:0016779//nucleotidyltransferase activity;GO:0003824//catalytic activity	GO:0006646//phosphatidylethanolamine biosynthetic process;GO:0009058//biosynthetic process	K00967//ethanolamine-phosphate cytidylyltransferase [EC:2.7.7.14]	NP_011521.1//ethanolamine-phosphate cytidylyltransferase [Saccharomyces cerevisiae S288C]
BK006948.2_mrna_5821	642	1145.87	1137.8	-0.0101919	0.97835	*	0.953264	GO:0071004//U2-type prespliceosome;GO:0005634//nucleus;GO:0005686//U2 snRNP;GO:1990904//ribonucleoprotein complex	GO:0003723//RNA binding	GO:0000398//mRNA splicing, via spliceosome	K12831//splicing factor 3B subunit 4	NP_014964.1//U2 snRNP complex subunit HSH49 [Saccharomyces cerevisiae S288C]
BK006945.2_mrna_3905	1518	1031.96	1000.41	-0.0448006	0.914442	*	0.820528	GO:0048188//Set1C/COMPASS complex;GO:0000781//chromosome, telomeric region	GO:0044212//transcription regulatory region DNA binding	GO:0080182//histone H3-K4 trimethylation;GO:0006351//transcription, DNA-templated;GO:0051568//histone H3-K4 methylation;GO:0006348//chromatin silencing at telomere;GO:0000723//telomere maintenance	K14967//COMPASS component BRE2	NP_013115.1//Bre2p [Saccharomyces cerevisiae S288C]
BK006938.2_mrna_783	1644	5605.15	6739.65	0.265921	0.339046	*	0.157726	GO:0000329//fungal-type vacuole membrane;GO:0000324//fungal-type vacuole;GO:0016021//integral component of membrane	NA	NA	NA	NP_010101.1//hypothetical protein YDL180W [Saccharomyces cerevisiae S288C]
BK006939.2_mrna_1713	1524	12869	12486.9	-0.0434835	0.914442	*	0.821231	GO:0005950//anthranilate synthase complex;GO:0005737//cytoplasm	GO:0046872//metal ion binding;GO:0004049//anthranilate synthase activity	GO:0000162//tryptophan biosynthetic process	K01657//anthranilate synthase component I [EC:4.1.3.27]	NP_011014.1//anthranilate synthase TRP2 [Saccharomyces cerevisiae S288C]
BK006944.2_mrna_3697	2052	1896.8	2557.42	0.431124	0.0812312	*	0.0207598	GO:0043601//nuclear replisome;GO:0005737//cytoplasm;GO:0033203//DNA helicase A complex	GO:0003677//DNA binding;GO:0005524//ATP binding;GO:0043141//ATP-dependent 5'-3' DNA helicase activity;GO:0004386//helicase activity	NA	K19783//DNA polymerase alpha-associated DNA helicase A [EC:3.6.4.12]	NP_012908.1//ATP-dependent 5'-3' DNA helicase HCS1 [Saccharomyces cerevisiae S288C]
BK006949.2_mrna_6028	1218	43362.4	23852.4	-0.86231	1.71076e-05	*	1.17964e-06	GO:0032991//protein-containing complex;GO:0005783//endoplasmic reticulum;GO:0000324//fungal-type vacuole;GO:0005739//mitochondrion	GO:0008233//peptidase activity;GO:0097718//disordered domain specific binding;GO:0070492//oligosaccharide binding;GO:0004190//aspartic-type endopeptidase activity	GO:0032258//protein localization by the Cvt pathway;GO:0051603//proteolysis involved in cellular protein catabolic process;GO:0016237//lysosomal microautophagy;GO:0009267//cellular response to starvation;GO:0030163//protein catabolic process;GO:0006508//proteolysis;GO:0006624//vacuolar protein processing;GO:0006914//autophagy;GO:0016236//macroautophagy	K01381//saccharopepsin [EC:3.4.23.25]	NP_015171.1//proteinase A [Saccharomyces cerevisiae S288C]
BK006936.2_mrna_123	393	3275.8	16854.4	2.36321	4.89394e-27	Up	4.83251e-29	GO:0005840//ribosome;GO:0022625//cytosolic large ribosomal subunit	GO:0003735//structural constituent of ribosome	GO:0006412//translation;GO:0002181//cytoplasmic translation	K02912//large subunit ribosomal protein L32e	NP_009460.1//ribosomal 60S subunit protein L32 [Saccharomyces cerevisiae S288C]
BK006934.2_mrna_2640	2067	11402.4	9204.31	-0.308962	0.133514	*	0.0408067	GO:0005737//cytoplasm;GO:0017101//aminoacyl-tRNA synthetase multienzyme complex	GO:0043022//ribosome binding;GO:0005524//ATP binding;GO:0002161//aminoacyl-tRNA editing activity;GO:0004827//proline-tRNA ligase activity	GO:0006433//prolyl-tRNA aminoacylation	K01881//prolyl-tRNA synthetase [EC:6.1.1.15]	NP_011884.1//proline--tRNA ligase [Saccharomyces cerevisiae S288C]
BK006943.2_mrna_3485	1809	932.71	1209.95	0.375442	0.2049	*	0.075273	GO:0005887//integral component of plasma membrane;GO:0000324//fungal-type vacuole;GO:0016021//integral component of membrane;GO:0071944//cell periphery;GO:0005886//plasma membrane	GO:0015151//alpha-glucoside transmembrane transporter activity;GO:0015144//carbohydrate transmembrane transporter activity;GO:0005351//carbohydrate:proton symporter activity;GO:0005363//maltose transmembrane transporter activity;GO:0022857//transmembrane transporter activity	GO:0008643//carbohydrate transport;GO:0000023//maltose metabolic process;GO:0000017//alpha-glucoside transport	K08141//MFS transporter, SP family, general alpha glucoside:H+ symporter	NP_012694.1//alpha-glucoside permease [Saccharomyces cerevisiae S288C]
BK006944.2_mrna_3780	2592	4218.01	4894.11	0.214482	0.240067	*	0.0942589	GO:0005634//nucleus;GO:0005739//mitochondrion;GO:0005737//cytoplasm	GO:0000981//DNA-binding transcription factor activity, RNA polymerase II-specific;GO:0003677//DNA binding;GO:0008270//zinc ion binding	GO:0000122//negative regulation of transcription by RNA polymerase II;GO:0071400//cellular response to oleic acid	K00573//protein-L-isoaspartate(D-aspartate) O-methyltransferase [EC:2.1.1.77]	NP_012990.1//Oaf3p [Saccharomyces cerevisiae S288C]
BK006946.2_mrna_4501	1023	426.723	417.19	-0.0325956	0.945899	*	0.889002	NA	NA	NA	NA	NP_013675.1//hypothetical protein YML037C [Saccharomyces cerevisiae S288C]
BK006944.2_mrna_3689	228	370.715	522.727	0.495749	0.0805001	*	0.0204652	GO:0016021//integral component of membrane	NA	NA	NA	NP_001032581.1//hypothetical protein YKL023C-A [Saccharomyces cerevisiae S288C]
BK006941.2_mrna_1978	231	1.39474	1.56694	0.167958	0.823578	*	0.667024	NA	NA	NA	NA	NP_011254.1//hypothetical protein YGL260W [Saccharomyces cerevisiae S288C]
BK006945.2_mrna_4001	531	10651.9	13425.2	0.333834	0.225308	*	0.0861225	GO:0005623//cell;GO:0005829//cytosol;GO:0005777//peroxisome;GO:0005739//mitochondrion;GO:0005886//plasma membrane;GO:0005737//cytoplasm	GO:0008379//thioredoxin peroxidase activity;GO:0016491//oxidoreductase activity	GO:0034599//cellular response to oxidative stress;GO:0042744//hydrogen peroxide catabolic process;GO:0010038//response to metal ion;GO:0045454//cell redox homeostasis	K14171//alkyl hydroperoxide reductase 1 [EC:1.11.1.15]	NP_013210.1//thioredoxin peroxidase AHP1 [Saccharomyces cerevisiae S288C]
BK006936.2_mrna_188	570	4891.49	17293.6	1.82189	1.3227e-14	Up	4.05111e-16	GO:0022625//cytosolic large ribosomal subunit	GO:0003723//RNA binding;GO:0003735//structural constituent of ribosome	GO:0006412//translation;GO:0002181//cytoplasmic translation	K02885//large subunit ribosomal protein L19e	NP_009526.1//ribosomal 60S subunit protein L19B [Saccharomyces cerevisiae S288C]
BK006946.2_mrna_4897	306	168.046	215.284	0.357383	0.35439	*	0.168446	NA	NA	NA	NA	NP_001335810.1//hypothetical protein YMR320W [Saccharomyces cerevisiae S288C]
BK006938.2_mrna_1305	1236	1321.55	1456.17	0.139953	0.688451	*	0.486928	GO:0005783//endoplasmic reticulum;GO:0042765//GPI-anchor transamidase complex;GO:0030176//integral component of endoplasmic reticulum membrane;GO:0005789//endoplasmic reticulum membrane	GO:0003923//GPI-anchor transamidase activity;GO:0008234//cysteine-type peptidase activity	GO:0016255//attachment of GPI anchor to protein;GO:0034394//protein localization to cell surface	K05290//phosphatidylinositol glycan, class K [EC:2.6.-.-]	NP_010618.1//GPI-anchor transamidase [Saccharomyces cerevisiae S288C]
BK006948.2_mrna_5610	1308	1693.84	2127.59	0.328926	0.153767	*	0.0493599	GO:0000127//transcription factor TFIIIC complex	GO:0001002//RNA polymerase III type 1 promoter sequence-specific DNA binding;GO:0003677//DNA binding;GO:0001003//RNA polymerase III type 2 promoter sequence-specific DNA binding;GO:0001004//RNA polymerase III transcription regulator recruiting activity;GO:0016791//phosphatase activity;GO:0003743//translation initiation factor activity;GO:0000995//RNA polymerase III general transcription initiatio…	GO:0042791//5S class rRNA transcription by RNA polymerase III;GO:0016311//dephosphorylation;GO:0070898//RNA polymerase III preinitiation complex assembly;GO:0006383//transcription by RNA polymerase III	K15206//transcription factor C subunit 7	NP_014753.1//transcription factor TFIIIC subunit TFC7 [Saccharomyces cerevisiae S288C]
BK006943.2_mrna_3457	630	3199.26	1933.11	-0.726814	1.50401e-06	*	8.96111e-08	GO:0005737//cytoplasm	GO:0000310//xanthine phosphoribosyltransferase activity;GO:0016757//transferase activity, transferring glycosyl groups;GO:0004615//phosphomannomutase activity;GO:0016740//transferase activity;GO:0004422//hypoxanthine phosphoribosyltransferase activity	GO:0009116//nucleoside metabolic process;GO:0032264//IMP salvage;GO:0046100//hypoxanthine metabolic process;GO:0032263//GMP salvage;GO:0032265//XMP salvage	K07101//uncharacterized protein	NP_012667.1//xanthine phosphoribosyltransferase [Saccharomyces cerevisiae S288C]
BK006943.2_mrna_3373	1725	1027.28	1085.37	0.0793505	0.831173	*	0.684001	GO:0000922//spindle pole;GO:0044732//mitotic spindle pole body;GO:0005816//spindle pole body;GO:1990334//Bfa1-Bub2 complex	GO:0005092//GDP-dissociation inhibitor activity;GO:0005096//GTPase activator activity	GO:0046578//regulation of Ras protein signal transduction;GO:0051301//cell division;GO:0001100//negative regulation of exit from mitosis;GO:0031578//mitotic spindle orientation checkpoint	K02181//cell cycle arrest protein BFA1	NP_012587.3//Bfa1p [Saccharomyces cerevisiae S288C]
BK006944.2_mrna_3613	720	1188.4	3880.67	1.70728	1.45432e-08	Up	6.66918e-10	NA	NA	NA	K01183//chitinase [EC:3.2.1.14]	SCU92262.1//LAFA_0F09142g1_1 [Lachancea sp. CBS 6924]
BK006936.2_mrna_431	2538	2135.7	2170.58	0.0233663	0.965496	*	0.928168	GO:0071162//CMG complex;GO:0005634//nucleus;GO:0005654//nucleoplasm;GO:0000781//chromosome, telomeric region;GO:0005737//cytoplasm;GO:0031261//DNA replication preinitiation complex;GO:0031298//replication fork protection complex;GO:0097373//MCM core complex;GO:0042555//MCM complex;GO:0005656//nuclear pre-replicative complex	GO:0003688//DNA replication origin binding;GO:0003677//DNA binding;GO:0005524//ATP binding;GO:1990163//ATP-dependent four-way junction helicase activity;GO:0043142//single-stranded DNA-dependent ATPase activity;GO:0003697//single-stranded DNA binding;GO:0003682//chromatin binding;GO:0017116//single-stranded DNA-dependent ATP-dependent DNA helicase activity;GO:1904931//MCM complex binding;GO:00431…	GO:0030466//chromatin silencing at silent mating-type cassette;GO:0000727//double-strand break repair via break-induced replication;GO:0006268//DNA unwinding involved in DNA replication;GO:0006270//DNA replication initiation;GO:0033260//nuclear DNA replication;GO:0006271//DNA strand elongation involved in DNA replication;GO:0006348//chromatin silencing at telomere;GO:0006267//pre-replicative comp…	K02210//DNA replication licensing factor MCM7 [EC:3.6.4.12]	NP_009761.4//mini-chromosome maintenance complex protein 7 [Saccharomyces cerevisiae S288C]
BK006948.2_mrna_5576	915	1040.64	949.221	-0.132653	0.592025	*	0.379391	GO:0034399//nuclear periphery	GO:0004799//thymidylate synthase activity	GO:0006231//dTMP biosynthetic process;GO:0006235//dTTP biosynthetic process	K00560//thymidylate synthase [EC:2.1.1.45]	KOH47895.1//CDC21p Thymidylate synthase [Saccharomyces sp. 'boulardii']
BK006938.2_mrna_1329	1143	9524.03	9711.32	0.0280946	0.935727	*	0.86588	GO:0005634//nucleus;GO:0005829//cytosol;GO:0005737//cytoplasm	GO:0004048//anthranilate phosphoribosyltransferase activity	GO:0000162//tryptophan biosynthetic process	K00766//anthranilate phosphoribosyltransferase [EC:2.4.2.18]	NP_010641.3//anthranilate phosphoribosyltransferase [Saccharomyces cerevisiae S288C]
BK006938.2_mrna_961	2706	4109.53	3427.7	-0.261732	0.556339	*	0.339297	GO:0005634//nucleus	GO:0016301//kinase activity	GO:0019933//cAMP-mediated signaling	K19851//flocculation protein FLO11	NP_010289.3//Sok1p [Saccharomyces cerevisiae S288C]
BK006948.2_mrna_5699	861	4850.06	4287.67	-0.177811	0.490984	*	0.279799	GO:0005672//transcription factor TFIIA complex;GO:0005737//cytoplasm	GO:0003743//translation initiation factor activity;GO:0000979//RNA polymerase II core promoter sequence-specific DNA binding;GO:0003712//transcription coregulator activity;GO:0017025//TBP-class protein binding	GO:0006367//transcription initiation from RNA polymerase II promoter;GO:0006366//transcription by RNA polymerase II;GO:0051123//RNA polymerase II preinitiation complex assembly	K03122//transcription initiation factor TFIIA large subunit	NP_014837.1//transcription initiation factor IIA large subunit [Saccharomyces cerevisiae S288C]
BK006948.2_mrna_5629	879	12249	13891.4	0.181525	0.451301	*	0.243438	GO:0005740//mitochondrial envelope;GO:0005743//mitochondrial inner membrane;GO:0016021//integral component of membrane;GO:0005739//mitochondrion	GO:0000064//L-ornithine transmembrane transporter activity;GO:0022857//transmembrane transporter activity	GO:0006526//arginine biosynthetic process;GO:1990575//mitochondrial L-ornithine transmembrane transport	K15114//mitochondrial ornithine carrier protein	NP_014773.4//Ort1p [Saccharomyces cerevisiae S288C]
BK006941.2_mrna_2137	648	4898.95	5797.74	0.243019	0.177175	*	0.0604324	GO:0005634//nucleus;GO:0005737//cytoplasm	GO:0050484//GMP 5'-nucleotidase activity;GO:0002953//5'-deoxynucleotidase activity	GO:0009159//deoxyribonucleoside monophosphate catabolic process;GO:0006226//dUMP biosynthetic process;GO:0010139//pyrimidine deoxyribonucleotide salvage	K07023//putative hydrolases of HD superfamily	NP_011414.1//hypothetical protein YGL101W [Saccharomyces cerevisiae S288C]
BK006940.2_mrna_1967	372	2273.83	1941.61	-0.227868	0.352644	*	0.167144	GO:0005840//ribosome;GO:0009353//mitochondrial oxoglutarate dehydrogenase complex;GO:0005761//mitochondrial ribosome;GO:0005763//mitochondrial small ribosomal subunit;GO:0005739//mitochondrion	GO:0004591//oxoglutarate dehydrogenase (succinyl-transferring) activity;GO:0003735//structural constituent of ribosome	GO:0006099//tricarboxylic acid cycle;GO:0032543//mitochondrial translation;GO:0006103//2-oxoglutarate metabolic process	K17417//small subunit ribosomal protein YMR-31	PTN18037.1//Rmd8p [Saccharomyces cerevisiae]
BK006938.2_mrna_1245	168	1427.63	1025.59	-0.477173	0.143228	*	0.0451139	GO:0016021//integral component of membrane;GO:0071944//cell periphery;GO:0005886//plasma membrane	GO:0080025//phosphatidylinositol-3,5-bisphosphate binding;GO:0070300//phosphatidic acid binding;GO:0046625//sphingolipid binding;GO:0032266//phosphatidylinositol-3-phosphate binding	GO:0035690//cellular response to drug;GO:0006812//cation transport;GO:0042391//regulation of membrane potential	NA	NP_010562.1//Pmp3p [Saccharomyces cerevisiae S288C]
BK006946.2_mrna_4689	909	1832.18	1738.91	-0.0753762	0.823578	*	0.667408	NA	GO:0016787//hydrolase activity	NA	K07025//putative hydrolase of the HAD superfamily	NP_013849.1//hypothetical protein YMR130W [Saccharomyces cerevisiae S288C]
BK006941.2_mrna_2017	843	11432.1	6266.63	-0.867326	0.000103659	*	8.19506e-06	NA	GO:0016787//hydrolase activity;GO:0008252//nucleotidase activity	GO:0006206//pyrimidine nucleobase metabolic process;GO:0009166//nucleotide catabolic process	K18551//pyrimidine and pyridine-specific 5'-nucleotidase [EC:3.1.3.-]	NP_011291.1//nucleotidase [Saccharomyces cerevisiae S288C]
BK006938.2_mrna_1410	987	2780.24	2200.65	-0.337279	0.245041	*	0.0970322	NA	GO:0018423//protein C-terminal leucine carboxyl O-methyltransferase activity	GO:0034622//cellular protein-containing complex assembly;GO:0006481//C-terminal protein methylation;GO:0010506//regulation of autophagy	K18203//[phosphatase 2A protein]-leucine-carboxy methyltransferase [EC:2.1.1.233]	NP_010723.1//leucine carboxy methyltransferase [Saccharomyces cerevisiae S288C]
BK006944.2_mrna_3543	414	1462.73	1704.67	0.220827	0.357797	*	0.170784	GO:0005762//mitochondrial large ribosomal subunit;GO:0005739//mitochondrion	GO:0003735//structural constituent of ribosome	GO:0032543//mitochondrial translation	K17440//large subunit ribosomal protein MRP49	NP_012754.1//mitochondrial 54S ribosomal protein MRP49 [Saccharomyces cerevisiae S288C]
BK006941.2_mrna_2456	1524	12942.9	12930.8	-0.00134876	0.9976	*	0.996432	GO:0016020//membrane;GO:0009277//fungal-type cell wall;GO:0005618//cell wall;GO:0000131//incipient cellular bud site;GO:0005576//extracellular region;GO:0071944//cell periphery;GO:0031225//anchored component of membrane	GO:0004553//hydrolase activity, hydrolyzing O-glycosyl compounds;GO:0016757//transferase activity, transferring glycosyl groups	GO:0031505//fungal-type cell wall organization;GO:0006037//cell wall chitin metabolic process;GO:0005975//carbohydrate metabolic process;GO:0071555//cell wall organization	K01183//chitinase [EC:3.2.1.14]	NP_011705.1//transglycosylase [Saccharomyces cerevisiae S288C]
BK006947.3_mrna_5116	1665	2383.83	672.448	-1.82578	1.32802e-18	Down	3.33395e-20	GO:0005829//cytosol;GO:0005782//peroxisomal matrix;GO:0005777//peroxisome;GO:0009514//glyoxysome;GO:0005737//cytoplasm	GO:0004474//malate synthase activity	GO:0006099//tricarboxylic acid cycle;GO:0006097//glyoxylate cycle	K01638//malate synthase [EC:2.3.3.9]	NP_014282.1//malate synthase MLS1 [Saccharomyces cerevisiae S288C]
BK006944.2_mrna_3655	3114	4202.1	5485.13	0.384413	0.0214572	*	0.00364414	GO:0016020//membrane;GO:0005643//nuclear pore;GO:0031965//nuclear membrane;GO:0000781//chromosome, telomeric region;GO:0031080//nuclear pore outer ring;GO:0016021//integral component of membrane	GO:0042802//identical protein binding;GO:0017056//structural constituent of nuclear pore	GO:0031081//nuclear pore distribution;GO:0006406//mRNA export from nucleus;GO:0035392//maintenance of chromatin silencing at telomere;GO:0034398//telomere tethering at nuclear periphery;GO:0045893//positive regulation of transcription, DNA-templated;GO:0031990//mRNA export from nucleus in response to heat stress;GO:0000055//ribosomal large subunit export from nucleus;GO:0006302//double-strand bre…	K14303//nuclear pore complex protein Nup160	NP_012866.1//Nup120p [Saccharomyces cerevisiae S288C]
BK006942.2_mrna_3052	1299	2726.49	2489.21	-0.131353	0.652201	*	0.442951	GO:0005783//endoplasmic reticulum;GO:0005829//cytosol;GO:0071944//cell periphery;GO:0005933//cellular bud	GO:0051087//chaperone binding	GO:0045040//protein import into mitochondrial outer membrane;GO:0016558//protein import into peroxisome matrix	K09503//DnaJ homolog subfamily A member 2	NP_012269.1//Djp1p [Saccharomyces cerevisiae S288C]
BK006938.2_mrna_778	3216	17650.5	10915.3	-0.693365	0.0507581	*	0.011222	GO:0005774//vacuolar membrane;GO:0012505//endomembrane system;GO:0000329//fungal-type vacuole membrane;GO:0000221//vacuolar proton-transporting V-type ATPase, V1 domain;GO:0005886//plasma membrane	GO:0003729//mRNA binding;GO:0003677//DNA binding;GO:0005524//ATP binding;GO:0004519//endonuclease activity;GO:0046961//proton-transporting ATPase activity, rotational mechanism	GO:0044267//cellular protein metabolic process;GO:0046034//ATP metabolic process;GO:1902600//proton transmembrane transport;GO:0016539//intein-mediated protein splicing;GO:0007035//vacuolar acidification;GO:0006314//intron homing	K02145//V-type H+-transporting ATPase subunit A [EC:7.1.2.2]	NP_010096.1//H(+)-transporting V1 sector ATPase subunit A [Saccharomyces cerevisiae S288C]
BK006945.2_mrna_4035	2340	4040.15	4092.37	0.0185254	0.955349	*	0.907062	GO:0009986//cell surface;GO:0005737//cytoplasm	GO:0042973//glucan endo-1,3-beta-D-glucosidase activity;GO:0052862//glucan endo-1,4-beta-glucanase activity, C-3 substituted reducing group;GO:0052861//glucan endo-1,3-beta-glucanase activity, C-3 substituted reducing group	GO:0008152//metabolic process;GO:0030036//actin cytoskeleton organization	K01180//endo-1,3(4)-beta-glucanase [EC:3.2.1.6]	NP_013245.1//Acf2p [Saccharomyces cerevisiae S288C]
BK006939.2_mrna_1566	3648	4084.01	3496.03	-0.224268	0.568526	*	0.351392	GO:0005783//endoplasmic reticulum;GO:0016021//integral component of membrane;GO:0005739//mitochondrion;GO:0005789//endoplasmic reticulum membrane;GO:0005801//cis-Golgi network	GO:0046872//metal ion binding;GO:0015662//ATPase activity, coupled to transmembrane movement of ions, phosphorylative mechanism;GO:0005524//ATP binding;GO:0016887//ATPase activity	GO:0055092//sterol homeostasis;GO:0055085//transmembrane transport;GO:0030026//cellular manganese ion homeostasis;GO:0006812//cation transport;GO:0006874//cellular calcium ion homeostasis	K14950//manganese-transporting P-type ATPase [EC:3.6.3.-]	NP_010883.3//ion-transporting P-type ATPase SPF1 [Saccharomyces cerevisiae S288C]
BK006938.2_mrna_1330	2835	3437.49	3366.87	-0.0299491	0.941033	*	0.876303	GO:0005634//nucleus;GO:0005822//inner plaque of spindle pole body;GO:0005823//central plaque of spindle pole body	GO:0005200//structural constituent of cytoskeleton	GO:1902481//gamma-tubulin complex assembly;GO:0000022//mitotic spindle elongation;GO:0000742//karyogamy involved in conjugation with cellular fusion;GO:0051259//protein complex oligomerization;GO:0007020//microtubule nucleation	K20361//intracellular protein transport protein USO1	NP_010643.3//Spc110p [Saccharomyces cerevisiae S288C]
BK006936.2_mrna_171	1920	4023.8	1634.14	-1.30003	4.42276e-09	Down	1.91715e-10	GO:0000324//fungal-type vacuole;GO:0016021//integral component of membrane;GO:0071944//cell periphery;GO:0005886//plasma membrane	GO:0015213//uridine transmembrane transporter activity;GO:0015205//nucleobase transmembrane transporter activity	GO:0055085//transmembrane transport;GO:0015862//uridine transport	K03457//nucleobase:cation symporter-1, NCS1 family	NP_009511.1//uridine permease [Saccharomyces cerevisiae S288C]
BK006942.2_mrna_2947	1551	3301.67	3029.08	-0.124321	0.668351	*	0.463822	GO:0005634//nucleus;GO:0034657//GID complex;GO:0005737//cytoplasm	GO:0046872//metal ion binding;GO:0016740//transferase activity;GO:0004842//ubiquitin-protein transferase activity	GO:0006511//ubiquitin-dependent protein catabolic process;GO:0043161//proteasome-mediated ubiquitin-dependent protein catabolic process;GO:0016567//protein ubiquitination;GO:0043066//negative regulation of apoptotic process;GO:0045721//negative regulation of gluconeogenesis	K18624//macrophage erythroblast attacher	NP_012169.1//glucose-induced degradation complex subunit FYV10 [Saccharomyces cerevisiae S288C]
BK006945.2_mrna_3878	1470	949.518	1076.42	0.180972	0.662986	*	0.456823	GO:0080008//Cul4-RING E3 ubiquitin ligase complex;GO:0005654//nucleoplasm;GO:0030686//90S preribosome;GO:0032040//small-subunit processome;GO:0005730//nucleolus	GO:0003729//mRNA binding	GO:0031167//rRNA methylation;GO:0000462//maturation of SSU-rRNA from tricistronic rRNA transcript (SSU-rRNA, 5.8S rRNA, LSU-rRNA)	K11806//WD repeat and SOF domain-containing protein 1	NP_013090.1//rRNA-processing protein SOF1 [Saccharomyces cerevisiae S288C]
BK006943.2_mrna_3418	849	5476.13	3955.59	-0.469263	0.0210505	*	0.00355481	GO:0005634//nucleus;GO:0005829//cytosol;GO:0005737//cytoplasm	GO:0004032//alditol:NADP+ 1-oxidoreductase activity;GO:0004033//aldo-keto reductase (NADP) activity;GO:0008106//alcohol dehydrogenase (NADP+) activity;GO:0016491//oxidoreductase activity	GO:0019568//arabinose catabolic process;GO:0034599//cellular response to oxidative stress;GO:0042843//D-xylose catabolic process	K18097//glycerol 2-dehydrogenase (NADP+) [EC:1.1.1.156];K17743//D-xylose reductase [EC:1.1.1.307]	NP_012630.1//aldo-keto reductase superfamily protein [Saccharomyces cerevisiae S288C]
BK006939.2_mrna_1792	1722	1558.79	1058.88	-0.557879	0.038975	*	0.00797934	NA	NA	NA	K19851//flocculation protein FLO11	NP_011085.1//hypothetical protein YER158C [Saccharomyces cerevisiae S288C]
BK006945.2_mrna_4187	2484	3361.45	3430.53	0.0293485	0.947458	*	0.891641	GO:0000800//lateral element	GO:0042802//identical protein binding;GO:0031490//chromatin DNA binding;GO:0005198//structural molecule activity	GO:0007130//synaptonemal complex assembly;GO:0030435//sporulation resulting in formation of a cellular spore;GO:0007131//reciprocal meiotic recombination;GO:0051598//meiotic recombination checkpoint;GO:0043085//positive regulation of catalytic activity	K12777//protein RED1	NP_013365.1//Red1p [Saccharomyces cerevisiae S288C]
BK006945.2_mrna_3892	876	513.039	856.743	0.739794	0.00785469	*	0.00105693	GO:0005634//nucleus;GO:0030686//90S preribosome;GO:0016021//integral component of membrane;GO:0005737//cytoplasm	NA	GO:0055085//transmembrane transport	K14784//protein CMS1	NP_013103.1//Cms1p [Saccharomyces cerevisiae S288C]
BK006944.2_mrna_3512	3132	4480.48	2838.71	-0.658419	0.00121957	*	0.000123488	GO:0005829//cytosol;GO:0005777//peroxisome;GO:0005778//peroxisomal membrane	GO:0005524//ATP binding;GO:0046982//protein heterodimerization activity;GO:0042623//ATPase activity, coupled;GO:0016887//ATPase activity	GO:0007031//peroxisome organization;GO:0016562//protein import into peroxisome matrix, receptor recycling;GO:0016558//protein import into peroxisome matrix;GO:0006625//protein targeting to peroxisome;GO:0043335//protein unfolding	K13338//peroxin-1	NP_012724.1//AAA family ATPase peroxin 1 [Saccharomyces cerevisiae S288C]
BK006936.2_mrna_311	1461	17309.2	11427.5	-0.599034	0.138624	*	0.0433139	GO:0005634//nucleus;GO:0005667//transcription factor complex;GO:1990527//Tec1p-Ste12p-Dig1p complex	GO:0003677//DNA binding;GO:0000978//RNA polymerase II proximal promoter sequence-specific DNA binding;GO:0001228//DNA-binding transcription activator activity, RNA polymerase II-specific;GO:0044212//transcription regulatory region DNA binding;GO:0001085//RNA polymerase II transcription factor binding;GO:0043565//sequence-specific DNA binding;GO:0003700//DNA-binding transcription factor activity;G…	GO:0007124//pseudohyphal growth;GO:0001403//invasive growth in response to glucose limitation;GO:0045944//positive regulation of transcription by RNA polymerase II;GO:0010527//positive regulation of transposition, RNA-mediated;GO:0036003//positive regulation of transcription from RNA polymerase II promoter in response to stress;GO:2000222//positive regulation of pseudohyphal growth;GO:0001300//ch…	K09448//transcriptional enhancer factor	NP_009639.3//Tec1p [Saccharomyces cerevisiae S288C]
BK006949.2_mrna_5922	1656	1255.19	1190.18	-0.0767241	0.833408	*	0.689323	GO:0005829//cytosol	GO:0008902//hydroxymethylpyrimidine kinase activity;GO:0005524//ATP binding;GO:0008972//phosphomethylpyrimidine kinase activity;GO:0050334//thiaminase activity	GO:0009228//thiamine biosynthetic process;GO:0009229//thiamine diphosphate biosynthetic process	K00877//hydroxymethylpyrimidine/phosphomethylpyrimidine kinase / thiaminase [EC:2.7.1.49 2.7.4.7 3.5.99.2]	NP_015065.1//bifunctional hydroxymethylpyrimidine kinase/phosphomethylpyrimidine kinase [Saccharomyces cerevisiae S288C]
BK006948.2_mrna_5761	1017	4941.49	7143.86	0.531758	0.0330277	*	0.00625856	GO:0008541//proteasome regulatory particle, lid subcomplex;GO:0000502//proteasome complex;GO:1990023//mitotic spindle midzone;GO:0005838//proteasome regulatory particle;GO:0034515//proteasome storage granule	NA	GO:0006511//ubiquitin-dependent protein catabolic process;GO:0043161//proteasome-mediated ubiquitin-dependent protein catabolic process	K03038//26S proteasome regulatory subunit N8	NP_014904.3//proteasome regulatory particle lid subunit RPN8 [Saccharomyces cerevisiae S288C]
BK006936.2_mrna_254	2760	1764.16	1442.74	-0.290162	0.141318	*	0.0444413	GO:0005634//nucleus	GO:0003677//DNA binding;GO:0000981//DNA-binding transcription factor activity, RNA polymerase II-specific;GO:0008270//zinc ion binding;GO:0043565//sequence-specific DNA binding	NA	K21641//glucose transport transcription regulator RGT1	NP_009589.1//Eds1p [Saccharomyces cerevisiae S288C]
BK006945.2_mrna_4162	2349	7984.62	9755.9	0.289051	0.165918	*	0.0553987	GO:0000329//fungal-type vacuole membrane;GO:0005783//endoplasmic reticulum;GO:0016021//integral component of membrane;GO:0005886//plasma membrane	GO:0005227//calcium activated cation channel activity	GO:0006812//cation transport	K21989//calcium permeable stress-gated cation channel	NP_013342.1//Csc1p [Saccharomyces cerevisiae S288C]
BK006936.2_mrna_306	2277	7291.42	7834.61	0.103662	0.67807	*	0.473942	GO:0005795//Golgi stack;GO:0005794//Golgi apparatus;GO:0005829//cytosol;GO:0043332//mating projection tip	GO:0000149//SNARE binding;GO:0005524//ATP binding;GO:0070300//phosphatidic acid binding;GO:0016887//ATPase activity	GO:0035494//SNARE complex disassembly;GO:0048211//Golgi vesicle docking;GO:0042144//vacuole fusion, non-autophagic;GO:0048219//inter-Golgi cisterna vesicle-mediated transport;GO:0043001//Golgi to plasma membrane protein transport;GO:0048280//vesicle fusion with Golgi apparatus;GO:0000045//autophagosome assembly;GO:0016236//macroautophagy	K06027//vesicle-fusing ATPase [EC:3.6.4.6]	NP_009636.3//AAA family ATPase SEC18 [Saccharomyces cerevisiae S288C]
BK006945.2_mrna_3899	483	339.475	418.939	0.303434	0.32377	*	0.146902	GO:1990879//CST complex	GO:0043047//single-stranded telomeric DNA binding	GO:0016233//telomere capping;GO:0007004//telomere maintenance via telomerase;GO:0032205//negative regulation of telomere maintenance	K11116//telomere length regulation protein	NP_013110.1//Ten1p [Saccharomyces cerevisiae S288C]
BK006942.2_mrna_3026	2766	3995.65	4167.18	0.0606401	0.85847	*	0.728586	GO:0005634//nucleus;GO:0034657//GID complex;GO:0005737//cytoplasm;GO:0005773//vacuole	NA	GO:0007039//protein catabolic process in the vacuole;GO:0043161//proteasome-mediated ubiquitin-dependent protein catabolic process;GO:0030437//ascospore formation;GO:0045944//positive regulation of transcription by RNA polymerase II;GO:0045721//negative regulation of gluconeogenesis	NA	NP_012247.3//glucose-induced degradation complex subunit VID28 [Saccharomyces cerevisiae S288C]
BK006948.2_mrna_5501	765	372.817	366.056	-0.0264041	0.962254	*	0.920708	GO:0005654//nucleoplasm;GO:0032040//small-subunit processome;GO:0005730//nucleolus;GO:0005739//mitochondrion	GO:0070181//small ribosomal subunit rRNA binding	GO:0031167//rRNA methylation;GO:0000462//maturation of SSU-rRNA from tricistronic rRNA transcript (SSU-rRNA, 5.8S rRNA, LSU-rRNA);GO:0000472//endonucleolytic cleavage to generate mature 5'-end of SSU-rRNA from (SSU-rRNA, 5.8S rRNA, LSU-rRNA);GO:0000447//endonucleolytic cleavage in ITS1 to separate SSU-rRNA from 5.8S rRNA and LSU-rRNA from tricistronic rRNA transcript (SSU-rRNA, 5.8S rRNA, LSU-rRN…	K14773//U3 small nucleolar RNA-associated protein 23	NP_014646.1//rRNA-binding ribosome biosynthesis protein UTP23 [Saccharomyces cerevisiae S288C]
BK006947.3_mrna_5132	969	5783.19	7355.93	0.34704	0.0324872	*	0.00613859	GO:0016020//membrane;GO:0005634//nucleus;GO:0071944//cell periphery;GO:0005739//mitochondrion;GO:0005789//endoplasmic reticulum membrane;GO:0005886//plasma membrane	GO:0005525//GTP binding;GO:0003924//GTPase activity	GO:0032258//protein localization by the Cvt pathway;GO:0007165//signal transduction;GO:0097271//protein localization to bud neck;GO:0030437//ascospore formation;GO:0010603//regulation of cytoplasmic mRNA processing body assembly;GO:0000411//positive regulation of transcription by galactose;GO:0045762//positive regulation of adenylate cyclase activity;GO:0007190//activation of adenylate cyclase ac…	K07827//GTPase KRas	NP_014301.1//Ras family GTPase RAS2 [Saccharomyces cerevisiae S288C]
BK006936.2_mrna_238	2757	3167.36	3779.64	0.254965	0.172025	*	0.0580997	GO:0005643//nuclear pore;GO:0031965//nuclear membrane;GO:0005934//cellular bud tip;GO:0005737//cytoplasm;GO:0005935//cellular bud neck;GO:0034399//nuclear periphery;GO:0005829//cytosol;GO:0016021//integral component of membrane	GO:0008565//protein transporter activity;GO:0008139//nuclear localization sequence binding	GO:0006607//NLS-bearing protein import into nucleus;GO:0006610//ribosomal protein import into nucleus;GO:0010458//exit from mitosis;GO:0006606//protein import into nucleus;GO:0051028//mRNA transport	K18752//transportin-1	NP_009573.1//Kap104p [Saccharomyces cerevisiae S288C]
BK006941.2_mrna_1990	2115	1578.23	1444.87	-0.127363	0.688324	*	0.486723	GO:0000795//synaptonemal complex;GO:0005739//mitochondrion	GO:0003677//DNA binding;GO:0000166//nucleotide binding	GO:0007130//synaptonemal complex assembly;GO:0007129//synapsis;GO:0007131//reciprocal meiotic recombination;GO:0033235//positive regulation of protein sumoylation	NA	NP_011265.1//Zip2p [Saccharomyces cerevisiae S288C]
BK006943.2_mrna_3145	285	1566.84	1318.67	-0.248771	0.283608	*	0.12169	GO:0005750//mitochondrial respiratory chain complex III;GO:0016021//integral component of membrane;GO:0005739//mitochondrion	GO:0008121//ubiquinol-cytochrome-c reductase activity	GO:0009060//aerobic respiration;GO:0006122//mitochondrial electron transport, ubiquinol to cytochrome c	K00418//ubiquinol-cytochrome c reductase subunit 8	NP_012369.1//ubiquinol--cytochrome-c reductase subunit 8 [Saccharomyces cerevisiae S288C]
BK006948.2_mrna_5584	888	160.741	130.962	-0.295589	0.594877	*	0.381717	GO:0005634//nucleus;GO:0005737//cytoplasm;GO:0033309//SBF transcription complex	GO:0003714//transcription corepressor activity;GO:0001135//RNA polymerase II transcription regulator recruiting activity;GO:0001085//RNA polymerase II transcription factor binding	GO:0007089//traversing start control point of mitotic cell cycle;GO:0071930//negative regulation of transcription involved in G1/S transition of mitotic cell cycle;GO:0008361//regulation of cell size	K12413//G1-specific transcriptional repressor WHI5	NP_014726.1//transcriptional repressor WHI5 [Saccharomyces cerevisiae S288C]
BK006948.2_mrna_5885	2085	1688.23	1207.16	-0.483898	0.195575	*	0.0697196	GO:0016021//integral component of membrane;GO:0005739//mitochondrion;GO:0005886//plasma membrane	GO:0046872//metal ion binding;GO:0000293//ferric-chelate reductase activity;GO:0052851//ferric-chelate reductase (NADPH) activity;GO:0016491//oxidoreductase activity	GO:0006879//cellular iron ion homeostasis;GO:0006826//iron ion transport;GO:0015677//copper ion import	NA	NP_015029.1//putative ferric-chelate reductase [Saccharomyces cerevisiae S288C]
BK006944.2_mrna_3634	1584	1376.1	1341.62	-0.0366113	0.921295	*	0.837511	GO:0000243//commitment complex	GO:0003723//RNA binding;GO:0003729//mRNA binding;GO:0045131//pre-mRNA branch point binding	GO:0000348//mRNA branch site recognition	K12837//splicing factor U2AF 65 kDa subunit	NP_012849.1//Mud2p [Saccharomyces cerevisiae S288C]
BK006947.3_mrna_4909	1302	3902.77	4160.53	0.092271	0.744896	*	0.555769	GO:0005634//nucleus;GO:0032221//Rpd3S complex;GO:0034399//nuclear periphery;GO:0033698//Rpd3L complex	GO:0046872//metal ion binding;GO:0003714//transcription corepressor activity;GO:0003713//transcription coactivator activity;GO:0032041//NAD-dependent histone deacetylase activity (H3-K14 specific)	GO:0061186//negative regulation of chromatin silencing at silent mating-type cassette;GO:0030174//regulation of DNA-dependent DNA replication initiation;GO:0070933//histone H4 deacetylation;GO:0061587//transfer RNA gene-mediated silencing;GO:0006368//transcription elongation from RNA polymerase II promoter;GO:0045128//negative regulation of reciprocal meiotic recombination;GO:0016239//positive re…	K06067//histone deacetylase 1/2 [EC:3.5.1.98]	XP_004182235.1//hypothetical protein TBLA_0I00560 [Tetrapisispora blattae CBS 6284]
BK006943.2_mrna_3279	2472	2991.81	2781.37	-0.105219	0.835867	*	0.693224	GO:0005643//nuclear pore;GO:0031965//nuclear membrane;GO:0044615//nuclear pore nuclear basket;GO:0034399//nuclear periphery;GO:0016021//integral component of membrane;GO:0044613//nuclear pore central transport channel	GO:0017056//structural constituent of nuclear pore;GO:0005543//phospholipid binding	GO:0097064//ncRNA export from nucleus;GO:0006607//NLS-bearing protein import into nucleus;GO:0000056//ribosomal small subunit export from nucleus;GO:0006409//tRNA export from nucleus;GO:0016973//poly(A)+ mRNA export from nucleus;GO:0000055//ribosomal large subunit export from nucleus;GO:0006606//protein import into nucleus;GO:0007049//cell cycle	K14306//nuclear pore complex protein Nup62	NP_012494.3//FG-nucleoporin NSP1 [Saccharomyces cerevisiae S288C]
BK006945.2_mrna_3834	1239	1307.58	4459.54	1.76999	1.40364e-07	Up	7.06381e-09	GO:0005737//cytoplasm	GO:0046872//metal ion binding;GO:0000908//taurine dioxygenase activity;GO:0000907//sulfonate dioxygenase activity;GO:0016491//oxidoreductase activity	GO:0046306//alkanesulfonate catabolic process;GO:0044273//sulfur compound catabolic process	K19245//sulfonate dioxygenase [EC:1.14.11.-]	NP_013043.1//sulfonate dioxygenase [Saccharomyces cerevisiae S288C]
BK006946.2_mrna_4570	1581	1600.79	1615.98	0.0136304	0.972275	*	0.941357	GO:0005759//mitochondrial matrix;GO:0005829//cytosol;GO:0005743//mitochondrial inner membrane;GO:0005739//mitochondrion;GO:0005737//cytoplasm	GO:0016740//transferase activity;GO:0005525//GTP binding;GO:0003924//GTPase activity	GO:0002098//tRNA wobble uridine modification;GO:0070899//mitochondrial tRNA wobble uridine modification;GO:0006400//tRNA modification;GO:0030488//tRNA methylation;GO:0048568//embryonic organ development	K03650//tRNA modification GTPase [EC:3.6.-.-]	NP_013736.1//Mss1p [Saccharomyces cerevisiae S288C]
BK006939.2_mrna_1831	483	10.0576	11.6856	0.216443	0.620435	*	0.40767	GO:0005634//nucleus;GO:0005739//mitochondrion	GO:0005524//ATP binding;GO:0003678//DNA helicase activity;GO:0003676//nucleic acid binding	GO:0000722//telomere maintenance via recombination;GO:0032508//DNA duplex unwinding	NA	NP_015040.1//Y' element ATP-dependent helicase protein 1 copy 7 [Saccharomyces cerevisiae S288C]
BK006936.2_mrna_445	1878	2632.4	2339.52	-0.170161	0.506984	*	0.294093	GO:0005634//nucleus;GO:0000417//HIR complex	NA	GO:0006368//transcription elongation from RNA polymerase II promoter;GO:0000083//regulation of transcription involved in G1/S transition of mitotic cell cycle;GO:0006336//DNA replication-independent nucleosome assembly	K01183//chitinase [EC:3.2.1.14]	NP_009774.4//Hpc2p [Saccharomyces cerevisiae S288C]
BK006945.2_mrna_4115	798	3655.3	3251.95	-0.168683	0.516005	*	0.302953	GO:0016282//eukaryotic 43S preinitiation complex;GO:0010494//cytoplasmic stress granule;GO:0033290//eukaryotic 48S preinitiation complex;GO:0005852//eukaryotic translation initiation factor 3 complex	GO:0003743//translation initiation factor activity	GO:0000462//maturation of SSU-rRNA from tricistronic rRNA transcript (SSU-rRNA, 5.8S rRNA, LSU-rRNA);GO:0001732//formation of cytoplasmic translation initiation complex;GO:0002181//cytoplasmic translation	K03245//translation initiation factor 3 subunit J	NP_013293.1//translation initiation factor eIF3 core subunit j [Saccharomyces cerevisiae S288C]
BK006941.2_mrna_2201	465	1125.64	907.52	-0.310749	0.198899	*	0.071965	GO:0005739//mitochondrion	NA	NA	NA	NP_001106172.4//hypothetical protein YGL041W-A [Saccharomyces cerevisiae S288C]
BK006947.3_mrna_5109	2022	5349.06	3196.63	-0.742734	0.00121203	*	0.000121913	GO:0016020//membrane;GO:0005783//endoplasmic reticulum;GO:0016021//integral component of membrane;GO:0071944//cell periphery;GO:0005739//mitochondrion;GO:0005789//endoplasmic reticulum membrane	GO:0015293//symporter activity;GO:0005215//transporter activity	GO:0006810//transport;GO:0055085//transmembrane transport;GO:0015718//monocarboxylic acid transport	K00276//primary-amine oxidase [EC:1.4.3.21];K11231//osomolarity two-component system, sensor histidine kinase SLN1 [EC:2.7.13.3]	NP_014274.1//Esbp6p [Saccharomyces cerevisiae S288C]
BK006941.2_mrna_1997	1203	1718.95	2475.11	0.525966	0.0392069	*	0.00805136	GO:0005634//nucleus;GO:0005737//cytoplasm	GO:0003723//RNA binding;GO:0046872//metal ion binding;GO:0004000//adenosine deaminase activity;GO:0043829//tRNA-specific adenosine-37 deaminase activity;GO:0008251//tRNA-specific adenosine deaminase activity	GO:0006396//RNA processing;GO:0006400//tRNA modification	K15440//tRNA-specific adenosine deaminase 1 [EC:3.5.4.34]	NP_011271.1//tRNA-specific adenosine deaminase [Saccharomyces cerevisiae S288C]
BK006939.2_mrna_1638	591	2156.74	1755.74	-0.296769	0.129313	*	0.0389995	GO:0005685//U1 snRNP;GO:0005686//U2 snRNP;GO:0005687//U4 snRNP;GO:0005737//cytoplasm;GO:0046540//U4/U6 x U5 tri-snRNP complex;GO:0071013//catalytic step 2 spliceosome;GO:0071004//U2-type prespliceosome;GO:0005682//U5 snRNP;GO:0019013//viral nucleocapsid	GO:0003723//RNA binding	GO:0000398//mRNA splicing, via spliceosome	K11086//small nuclear ribonucleoprotein B and B'	NP_010946.3//mRNA splicing protein SMB1 [Saccharomyces cerevisiae S288C]
BK006935.2_mrna_6	381	108.598	66.5413	-0.706669	0.0774014	*	0.0193406	NA	NA	GO:0000128//flocculation	K10955//mucin-2	NP_058136.1//Tda8p [Saccharomyces cerevisiae S288C]
BK006948.2_mrna_5466	342	1304.48	1493.81	0.195523	0.332379	*	0.152644	GO:0031307//integral component of mitochondrial outer membrane;GO:0005741//mitochondrial outer membrane	NA	GO:0045040//protein import into mitochondrial outer membrane;GO:0070096//mitochondrial outer membrane translocase complex assembly	K03217//YidC/Oxa1 family membrane protein insertase	EGA84894.1//Mim1p, partial [Saccharomyces cerevisiae VL3]
BK006945.2_mrna_4020	2832	685.675	962.158	0.488749	0.164912	*	0.0549247	GO:0034388//Pwp2p-containing subcomplex of 90S preribosome;GO:0005654//nucleoplasm;GO:0030686//90S preribosome;GO:0032040//small-subunit processome;GO:0005730//nucleolus	GO:0030515//snoRNA binding	GO:0031167//rRNA methylation;GO:0000462//maturation of SSU-rRNA from tricistronic rRNA transcript (SSU-rRNA, 5.8S rRNA, LSU-rRNA);GO:0000472//endonucleolytic cleavage to generate mature 5'-end of SSU-rRNA from (SSU-rRNA, 5.8S rRNA, LSU-rRNA);GO:0000447//endonucleolytic cleavage in ITS1 to separate SSU-rRNA from 5.8S rRNA and LSU-rRNA from tricistronic rRNA transcript (SSU-rRNA, 5.8S rRNA, LSU-rRN…	K14556//U3 small nucleolar RNA-associated protein 12	NP_013230.1//snoRNA-binding rRNA-processing protein DIP2 [Saccharomyces cerevisiae S288C]
BK006939.2_mrna_1748	786	737.122	889.406	0.270938	0.581678	*	0.364329	GO:0005634//nucleus;GO:0005730//nucleolus;GO:0030687//preribosome, large subunit precursor	NA	GO:0000466//maturation of 5.8S rRNA from tricistronic rRNA transcript (SSU-rRNA, 5.8S rRNA, LSU-rRNA);GO:0000463//maturation of LSU-rRNA from tricistronic rRNA transcript (SSU-rRNA, 5.8S rRNA, LSU-rRNA);GO:0006364//rRNA processing;GO:0042273//ribosomal large subunit biogenesis	K14842//ribosome biogenesis protein NSA2	NP_011052.1//rRNA-processing protein NSA2 [Saccharomyces cerevisiae S288C]
BK006936.2_mrna_297	636	1693.27	1883.14	0.153329	0.725584	*	0.530678	GO:0005737//cytoplasm;GO:0005935//cellular bud neck	NA	NA	NA	NP_009627.3//hypothetical protein YBR071W [Saccharomyces cerevisiae S288C]
BK006945.2_mrna_3887	2841	4136.26	4111.72	-0.00858544	0.981117	*	0.959792	GO:0000922//spindle pole;GO:0005825//half bridge of spindle pole body	NA	GO:0030474//spindle pole body duplication;GO:0051225//spindle assembly;GO:0051301//cell division;GO:0000086//G2/M transition of mitotic cell cycle	NA	NP_013098.1//Sfi1p [Saccharomyces cerevisiae S288C]
BK006939.2_mrna_1813	3366	9776.03	8867.03	-0.140797	0.635587	*	0.424859	GO:0010494//cytoplasmic stress granule;GO:0005737//cytoplasm;GO:0005844//polysome	GO:0003723//RNA binding;GO:0003729//mRNA binding;GO:0003677//DNA binding;GO:0004004//ATP-dependent RNA helicase activity;GO:0005524//ATP binding;GO:0003724//RNA helicase activity;GO:0004386//helicase activity;GO:0003678//DNA helicase activity	GO:0006449//regulation of translational termination;GO:0000184//nuclear-transcribed mRNA catabolic process, nonsense-mediated decay	K14326//regulator of nonsense transcripts 1 [EC:3.6.4.-]	NP_011103.1//Ecm32p [Saccharomyces cerevisiae S288C]
BK006939.2_mrna_1764	447	78.2766	106.638	0.446066	0.323178	*	0.145936	NA	GO:0008270//zinc ion binding;GO:0003676//nucleic acid binding	NA	NA	NP_011063.3//hypothetical protein YER137C [Saccharomyces cerevisiae S288C]
BK006948.2_mrna_5395	2121	1316.53	1458.69	0.147936	0.68646	*	0.483797	GO:0005759//mitochondrial matrix;GO:0005634//nucleus;GO:0005743//mitochondrial inner membrane;GO:0005739//mitochondrion	GO:0003677//DNA binding;GO:0005524//ATP binding;GO:0043140//ATP-dependent 3'-5' DNA helicase activity;GO:0004003//ATP-dependent DNA helicase activity	GO:0032042//mitochondrial DNA metabolic process;GO:0000725//recombinational repair;GO:0006281//DNA repair;GO:0000002//mitochondrial genome maintenance	K19781//ATP-dependent DNA helicase HMI1, mitochondrial [EC:3.6.4.12]	NP_014546.1//ATP-dependent 3'-5' DNA helicase [Saccharomyces cerevisiae S288C]
BK006940.2_mrna_1888	2079	4853.41	4530.37	-0.0993683	0.768993	*	0.589197	GO:0005634//nucleus;GO:0005829//cytosol;GO:0031011//Ino80 complex	NA	GO:0042766//nucleosome mobilization	K11675//Ino eighty subunit 1	NP_116641.1//Ies1p [Saccharomyces cerevisiae S288C]
BK006946.2_mrna_4528	213	925.491	944.436	0.0292338	0.926177	*	0.845451	GO:0005840//ribosome;GO:0005762//mitochondrial large ribosomal subunit;GO:0005739//mitochondrion	GO:0003735//structural constituent of ribosome	GO:0032543//mitochondrial translation;GO:0006412//translation	K02913//large subunit ribosomal protein L33	NP_013705.1//mitochondrial 54S ribosomal protein YmL39 [Saccharomyces cerevisiae S288C]
BK006948.2_mrna_5859	489	2482.11	2004.75	-0.308142	0.202247	*	0.0740615	GO:0005768//endosome;GO:0000329//fungal-type vacuole membrane;GO:0032994//protein-lipid complex;GO:0005829//cytosol;GO:0031902//late endosome membrane;GO:0000139//Golgi membrane	GO:0032266//phosphatidylinositol-3-phosphate binding;GO:0035091//phosphatidylinositol binding	GO:0034499//late endosome to Golgi transport;GO:0008104//protein localization;GO:0015031//protein transport	K17918//sorting nexin-3/12	NP_015002.3//Snx3p [Saccharomyces cerevisiae S288C]
BK006948.2_mrna_5609	3324	3790.13	3549.59	-0.0945925	0.791995	*	0.620417	GO:0016020//membrane;GO:0030479//actin cortical patch	GO:0043812//phosphatidylinositol-4-phosphate phosphatase activity;GO:0043813//phosphatidylinositol-3,5-bisphosphate 5-phosphatase activity;GO:0004439//phosphatidylinositol-4,5-bisphosphate 5-phosphatase activity;GO:0042578//phosphoric ester hydrolase activity;GO:0004438//phosphatidylinositol-3-phosphatase activity	GO:0046856//phosphatidylinositol dephosphorylation	K20279//synaptojanin [EC:3.1.3.36]	GAA26428.1//K7_Inp53p [Saccharomyces cerevisiae Kyokai no. 7]
BK006949.2_mrna_6338	1851	3329.55	3770.78	0.179536	0.377249	*	0.184905	GO:0016021//integral component of membrane;GO:0005739//mitochondrion;GO:0005741//mitochondrial outer membrane	NA	GO:0016071//mRNA metabolic process;GO:0009060//aerobic respiration	K18158//nuclear control of ATPase protein 2	NP_015481.1//Nca2p [Saccharomyces cerevisiae S288C]
BK006939.2_mrna_1631	861	7353.35	5168.56	-0.508638	0.001616	*	0.000171471	GO:0005737//cytoplasm	GO:0042802//identical protein binding;GO:0004735//pyrroline-5-carboxylate reductase activity	GO:0006561//proline biosynthetic process;GO:0055129//L-proline biosynthetic process	K00286//pyrroline-5-carboxylate reductase [EC:1.5.1.2]	NP_010940.3//pyrroline-5-carboxylate reductase [Saccharomyces cerevisiae S288C]
BK006936.2_mrna_378	876	440.75	451.137	0.0336053	0.943255	*	0.882511	GO:0005634//nucleus;GO:0005681//spliceosomal complex;GO:0005829//cytosol;GO:0046540//U4/U6 x U5 tri-snRNP complex	GO:0003723//RNA binding	GO:0000349//generation of catalytic spliceosome for first transesterification step;GO:0000398//mRNA splicing, via spliceosome	K13110//microfibrillar-associated protein 1	NP_009710.3//U4/U6-U5 snRNP complex subunit SPP381 [Saccharomyces cerevisiae S288C]
BK006946.2_mrna_4580	2010	1229.9	1625.46	0.402304	0.250332	*	0.100498	GO:0005856//cytoskeleton;GO:0120104//actomyosin contractile ring, proximal layer;GO:0005737//cytoplasm;GO:0005935//cellular bud neck;GO:0032153//cell division site;GO:0000144//cellular bud neck septin ring;GO:0098753//anchored component of the cytoplasmic side of the plasma membrane;GO:0000142//cellular bud neck contractile ring;GO:0120155//MIH complex;GO:0005886//plasma membrane;GO:0044697//HICS…	GO:0042802//identical protein binding;GO:0008092//cytoskeletal protein binding	GO:1903475//mitotic actomyosin contractile ring assembly;GO:0031671//primary cell septum biogenesis;GO:0090339//negative regulation of formin-nucleated actin cable assembly;GO:0000281//mitotic cytokinesis;GO:1903476//protein localization to cell division site involved in mitotic actomyosin contractile ring assembly;GO:1903471//regulation of mitotic actomyosin contractile ring contraction;GO:19034…	NA	NP_013746.1//formin-binding protein HOF1 [Saccharomyces cerevisiae S288C]
BK006941.2_mrna_1984	1131	1729.99	3704.16	1.09839	0.0051122	Up	0.000627153	GO:0005783//endoplasmic reticulum;GO:0005887//integral component of plasma membrane;GO:0016021//integral component of membrane;GO:0071944//cell periphery;GO:0005886//plasma membrane	GO:0000006//high-affinity zinc transmembrane transporter activity;GO:0005385//zinc ion transmembrane transporter activity	GO:0071578//zinc ion import across plasma membrane;GO:0071577//zinc ion transmembrane transport	K14709//solute carrier family 39 (zinc transporter), member 1/2/3	NP_011259.1//high-affinity Zn(2+) transporter ZRT1 [Saccharomyces cerevisiae S288C]
BK006943.2_mrna_3388	1350	5561.03	5607.38	0.0119722	0.976475	*	0.950163	GO:0005885//Arp2/3 protein complex;GO:0030479//actin cortical patch;GO:0032153//cell division site;GO:0005886//plasma membrane;GO:0051285//cell cortex of cell tip	GO:0003779//actin binding;GO:0005524//ATP binding	GO:1903475//mitotic actomyosin contractile ring assembly;GO:0000001//mitochondrion inheritance;GO:0007015//actin filament organization;GO:0034314//Arp2/3 complex-mediated actin nucleation;GO:0044396//actin cortical patch organization;GO:0051666//actin cortical patch localization;GO:0030041//actin filament polymerization	K18584//actin-related protein 3	NP_012599.3//actin-related protein 3 [Saccharomyces cerevisiae S288C]
BK006947.3_mrna_5182	1212	3132.3	3414.44	0.124426	0.712212	*	0.514104	GO:0017119//Golgi transport complex;GO:0005829//cytosol;GO:0000139//Golgi membrane	GO:0042802//identical protein binding	GO:0032258//protein localization by the Cvt pathway;GO:0015031//protein transport;GO:0006891//intra-Golgi vesicle-mediated transport	NA	NP_014347.1//Golgi transport complex subunit COG5 [Saccharomyces cerevisiae S288C]
BK006937.2_mrna_587	1095	32645.2	39948.3	0.291265	0.353362	*	0.16778	GO:0005829//cytosol	GO:0000287//magnesium ion binding;GO:0003862//3-isopropylmalate dehydrogenase activity;GO:0051287//NAD binding	GO:0009098//leucine biosynthetic process;GO:0006097//glyoxylate cycle	K00052//3-isopropylmalate dehydrogenase [EC:1.1.1.85]	NP_009911.2//3-isopropylmalate dehydrogenase [Saccharomyces cerevisiae S288C]
BK006934.2_mrna_2840	807	3217.62	2674.15	-0.26691	0.36837	*	0.177989	GO:0005634//nucleus;GO:0008541//proteasome regulatory particle, lid subcomplex;GO:0000502//proteasome complex;GO:0005829//cytosol;GO:0008540//proteasome regulatory particle, base subcomplex	GO:0036435//K48-linked polyubiquitin modification-dependent protein binding;GO:0031593//polyubiquitin modification-dependent protein binding;GO:0005198//structural molecule activity	GO:0043248//proteasome assembly;GO:0006511//ubiquitin-dependent protein catabolic process;GO:0043161//proteasome-mediated ubiquitin-dependent protein catabolic process	K03029//26S proteasome regulatory subunit N10	NP_012070.3//proteasome regulatory particle base subunit RPN10 [Saccharomyces cerevisiae S288C]
BK006948.2_mrna_5690	351	2474.07	2237.08	-0.14527	0.514362	*	0.3013	GO:0005634//nucleus;GO:0031011//Ino80 complex	NA	GO:0000722//telomere maintenance via recombination;GO:0006338//chromatin remodeling;GO:0006974//cellular response to DNA damage stimulus	K11678//Ino eighty subunit 4	NP_014832.1//Ies4p [Saccharomyces cerevisiae S288C]
BK006943.2_mrna_3484	1074	124.848	146.083	0.226622	0.659958	*	0.454074	NA	GO:0003939//L-iditol 2-dehydrogenase activity;GO:0008270//zinc ion binding;GO:0016491//oxidoreductase activity	GO:0019318//hexose metabolic process	K05351//D-xylulose reductase [EC:1.1.1.9];K00008//L-iditol 2-dehydrogenase [EC:1.1.1.14]	NP_012693.1//L-iditol 2-dehydrogenase SOR1 [Saccharomyces cerevisiae S288C]
BK006943.2_mrna_3445	1494	3793.7	4059.57	0.0977221	0.68646	*	0.483206	GO:0005759//mitochondrial matrix;GO:0005739//mitochondrion	GO:0016740//transferase activity	GO:0016226//iron-sulfur cluster assembly;GO:0106035//protein maturation by [4Fe-4S] cluster transfer;GO:0106034//protein maturation by [2Fe-2S] cluster transfer	K22073//transferase CAF17, mitochondrial [EC:2.1.-.-]	NP_012656.1//Iba57p [Saccharomyces cerevisiae S288C]
BK006941.2_mrna_2222	2283	10087.6	8572.71	-0.234752	0.323695	*	0.146793	GO:0005634//nucleus;GO:0005737//cytoplasm	GO:0004674//protein serine/threonine kinase activity;GO:0005524//ATP binding;GO:0004672//protein kinase activity;GO:0072354//histone kinase activity (H3-T3 specific)	GO:0000278//mitotic cell cycle;GO:0006468//protein phosphorylation;GO:0035556//intracellular signal transduction;GO:0006974//cellular response to DNA damage stimulus	K16315//serine/threonine-protein kinase haspin [EC:2.7.11.1]	NP_011494.1//protein kinase ALK1 [Saccharomyces cerevisiae S288C]
BK006946.2_mrna_4677	1875	3920.55	4071.45	0.0544864	0.862271	*	0.736142	GO:0097658//Asi complex;GO:0034399//nuclear periphery;GO:0005637//nuclear inner membrane;GO:0016021//integral component of membrane	GO:0046872//metal ion binding;GO:0004842//ubiquitin-protein transferase activity	GO:0006511//ubiquitin-dependent protein catabolic process;GO:0036369//transcription factor catabolic process;GO:0071230//cellular response to amino acid stimulus	NA	NP_013837.1//putative ubiquitin-protein ligase ASI1 [Saccharomyces cerevisiae S288C]
BK006937.2_mrna_700	3057	2689.89	2541.66	-0.0817788	0.802648	*	0.634596	GO:0005634//nucleus;GO:0032302//MutSbeta complex;GO:0032300//mismatch repair complex;GO:0005737//cytoplasm	GO:0000406//double-strand/single-strand DNA junction binding;GO:0032135//DNA insertion or deletion binding;GO:0003684//damaged DNA binding;GO:0005524//ATP binding;GO:0030983//mismatched DNA binding;GO:0032357//oxidized purine DNA binding;GO:0008094//DNA-dependent ATPase activity	GO:0006298//mismatch repair;GO:0051096//positive regulation of helicase activity;GO:0000735//removal of nonhomologous ends;GO:0000710//meiotic mismatch repair;GO:0007131//reciprocal meiotic recombination;GO:0043111//replication fork arrest;GO:0006312//mitotic recombination;GO:0043570//maintenance of DNA repeat elements;GO:0006310//DNA recombination	K08736//DNA mismatch repair protein MSH3	CAA46116.1//ORF YCR1152 [Saccharomyces cerevisiae]
BK006942.2_mrna_3000	1617	2429.73	1899.31	-0.355318	0.0595981	*	0.0137051	GO:0005737//cytoplasm	GO:0019888//protein phosphatase regulator activity	GO:0005979//regulation of glycogen biosynthetic process	NA	NP_012219.3//putative protein phosphatase regulator PIG2 [Saccharomyces cerevisiae S288C]
BK006936.2_mrna_426	1395	6566.35	8926.22	0.442957	0.0124163	*	0.00182244	GO:0000324//fungal-type vacuole;GO:0005794//Golgi apparatus;GO:0016021//integral component of membrane	GO:0000026//alpha-1,2-mannosyltransferase activity;GO:0000030//mannosyltransferase activity	GO:0000032//cell wall mannoprotein biosynthetic process;GO:0006486//protein glycosylation;GO:0006493//protein O-linked glycosylation;GO:0006487//protein N-linked glycosylation	K03854//mannosyltransferase [EC:2.4.1.-]	NP_009758.3//putative mannosyltransferase [Saccharomyces cerevisiae S288C]
BK006936.2_mrna_393	1359	5158.25	5816.32	0.173226	0.508414	*	0.29574	GO:0005737//cytoplasm	GO:0070403//NAD+ binding;GO:0008977//prephenate dehydrogenase (NAD+) activity;GO:0004665//prephenate dehydrogenase (NADP+) activity	GO:0006571//tyrosine biosynthetic process;GO:0006570//tyrosine metabolic process;GO:0055114//oxidation-reduction process	K00211//prephenate dehydrogenase (NADP+) [EC:1.3.1.13]	NP_009725.1//prephenate dehydrogenase (NADP(+)) [Saccharomyces cerevisiae S288C]
BK006947.3_mrna_5025	2349	4395.67	5174.22	0.235258	0.269121	*	0.112242	GO:0005737//cytoplasm	NA	NA	K15445//tRNA (guanine9-N1)-methyltransferase [EC:2.1.1.221]	NP_014187.1//Vid27p [Saccharomyces cerevisiae S288C]
BK006947.3_mrna_5018	1668	3488.58	3776.09	0.114253	0.6039	*	0.391145	GO:0005783//endoplasmic reticulum;GO:0016021//integral component of membrane;GO:0005789//endoplasmic reticulum membrane	GO:0052918//dol-P-Man:Man(8)GlcNAc(2)-PP-Dol alpha-1,2-mannosyltransferase activity;GO:0052926//dol-P-Man:Man(6)GlcNAc(2)-PP-Dol alpha-1,2-mannosyltransferase activity;GO:0000030//mannosyltransferase activity	GO:0006486//protein glycosylation;GO:0006487//protein N-linked glycosylation;GO:0006488//dolichol-linked oligosaccharide biosynthetic process	K03846//alpha-1,2-mannosyltransferase [EC:2.4.1.259 2.4.1.261]	NP_014180.1//dolichyl-P-Man:Man(6)GlcNAc(2)-PP-dolichol alpha-1,2-mannosyltransferase [Saccharomyces cerevisiae S288C]
BK006934.2_mrna_2635	1980	326.993	247.682	-0.400768	0.412143	*	0.209624	GO:0010494//cytoplasmic stress granule;GO:0005634//nucleus;GO:1990904//ribonucleoprotein complex;GO:0005623//cell;GO:0005829//cytosol;GO:0005737//cytoplasm	GO:0008143//poly(A) binding;GO:0003723//RNA binding;GO:0008266//poly(U) RNA binding;GO:0003730//mRNA 3'-UTR binding	GO:0006406//mRNA export from nucleus	K13126//polyadenylate-binding protein	NP_011879.1//Mip6p [Saccharomyces cerevisiae S288C]
BK006934.2_mrna_2679	186	273.247	216.195	-0.337873	0.692318	*	0.490706	GO:0005829//cytosol;GO:0016021//integral component of membrane	GO:0004784//superoxide dismutase activity;GO:0016209//antioxidant activity;GO:0046870//cadmium ion binding;GO:0005507//copper ion binding	GO:0019430//removal of superoxide radicals;GO:0071585//detoxification of cadmium ion;GO:0010273//detoxification of copper ion;GO:0046688//response to copper ion	NA	NP_011920.1//metallothionein CUP1 [Saccharomyces cerevisiae S288C]
BK006947.3_mrna_5045	1629	8397.9	7361.86	-0.189959	0.390116	*	0.19372	GO:0005634//nucleus;GO:0005654//nucleoplasm;GO:0005643//nuclear pore;GO:0005737//cytoplasm;GO:0048471//perinuclear region of cytoplasm;GO:0042564//NLS-dependent protein nuclear import complex;GO:0032991//protein-containing complex;GO:0005829//cytosol;GO:0016021//integral component of membrane	GO:0008565//protein transporter activity;GO:0061608//nuclear import signal receptor activity;GO:0097718//disordered domain specific binding;GO:0044877//protein-containing complex binding;GO:0008139//nuclear localization sequence binding	GO:0006612//protein targeting to membrane;GO:0006607//NLS-bearing protein import into nucleus;GO:0006606//protein import into nucleus;GO:0031144//proteasome localization	K08332//vacuolar protein 8	NP_014210.1//karyopherin alpha [Saccharomyces cerevisiae S288C]
BK006945.2_mrna_4325	237	2444.26	2963.54	0.277927	0.214636	*	0.0803224	GO:0016021//integral component of membrane;GO:0005739//mitochondrion;GO:0005751//mitochondrial respiratory chain complex IV	GO:0004129//cytochrome-c oxidase activity	GO:0006123//mitochondrial electron transport, cytochrome c to oxygen	K02272//cytochrome c oxidase subunit 7c	EWH16990.1//Cox8p [Saccharomyces cerevisiae P283]
BK006946.2_mrna_4865	1518	313.051	366.778	0.228511	0.679721	*	0.47552	GO:0005635//nuclear envelope;GO:0031428//box C/D snoRNP complex;GO:0030687//preribosome, large subunit precursor;GO:0031429//box H/ACA snoRNP complex	GO:0003723//RNA binding;GO:0004004//ATP-dependent RNA helicase activity;GO:0005524//ATP binding;GO:0042802//identical protein binding	GO:0000462//maturation of SSU-rRNA from tricistronic rRNA transcript (SSU-rRNA, 5.8S rRNA, LSU-rRNA);GO:0000463//maturation of LSU-rRNA from tricistronic rRNA transcript (SSU-rRNA, 5.8S rRNA, LSU-rRNA);GO:1990417//snoRNA release from pre-rRNA	K13179//ATP-dependent RNA helicase DDX18/HAS1 [EC:3.6.4.13]	AJS64339.1//Has1p [Saccharomyces cerevisiae YJM270]
BK006945.2_mrna_3880	210	571.994	476.808	-0.26259	0.360122	*	0.172497	GO:0005829//cytosol;GO:0005758//mitochondrial intermembrane space;GO:0005739//mitochondrion	GO:0016531//copper chaperone activity;GO:1903136//cuprous ion binding	GO:0033617//mitochondrial respiratory chain complex IV assembly;GO:0015680//protein maturation by copper ion transfer;GO:0009060//aerobic respiration;GO:0018343//protein farnesylation;GO:0006825//copper ion transport	K02260//cytochrome c oxidase assembly protein subunit 17	NP_013092.1//copper metallochaperone COX17 [Saccharomyces cerevisiae S288C]
BK006943.2_mrna_3328	915	2845.94	2947.42	0.0505514	0.891493	*	0.78332	GO:0005840//ribosome;GO:0043614//multi-eIF complex;GO:0010494//cytoplasmic stress granule;GO:0005851//eukaryotic translation initiation factor 2B complex;GO:0033290//eukaryotic 48S preinitiation complex;GO:0005850//eukaryotic translation initiation factor 2 complex;GO:0005737//cytoplasm	GO:0043022//ribosome binding;GO:0003743//translation initiation factor activity	GO:0006413//translational initiation;GO:0001731//formation of translation preinitiation complex	K03237//translation initiation factor 2 subunit 1	NP_012540.3//translation initiation factor eIF2 subunit alpha [Saccharomyces cerevisiae S288C]
BK006941.2_mrna_2128	1551	4727.79	5833.46	0.303184	0.0966949	*	0.0261998	GO:0000124//SAGA complex;GO:0005634//nucleus;GO:0005829//cytosol;GO:0046695//SLIK (SAGA-like) complex;GO:0005669//transcription factor TFIID complex	GO:0032947//protein-containing complex scaffold activity;GO:0042802//identical protein binding;GO:0003682//chromatin binding;GO:0046982//protein heterodimerization activity;GO:0001102//RNA polymerase II activating transcription factor binding	GO:0006357//regulation of transcription by RNA polymerase II;GO:0006325//chromatin organization;GO:0016573//histone acetylation;GO:0006367//transcription initiation from RNA polymerase II promoter;GO:0006366//transcription by RNA polymerase II;GO:0051123//RNA polymerase II preinitiation complex assembly	K03131//transcription initiation factor TFIID subunit 6	NP_011403.1//Taf6p [Saccharomyces cerevisiae S288C]
BK006935.2_mrna_42	4416	5019.59	4640.65	-0.113241	0.727757	*	0.534338	GO:0016459//myosin complex;GO:0005934//cellular bud tip;GO:0005739//mitochondrion;GO:0031941//filamentous actin;GO:0005933//cellular bud	GO:0051015//actin filament binding;GO:0005524//ATP binding;GO:0003774//motor activity;GO:0000146//microfilament motor activity;GO:0005516//calmodulin binding	GO:0008298//intracellular mRNA localization;GO:0007533//mating type switching;GO:0048309//endoplasmic reticulum inheritance;GO:0051028//mRNA transport	K10357//myosin V	NP_009373.1//myosin 4 [Saccharomyces cerevisiae S288C]
BK006943.2_ncrna_3452	194	13.5511	12.923	-0.068463	0.942991	*	0.88163	NA	NA	NA	NA	NA
BK006936.2_mrna_209	2523	1308.77	1062.73	-0.300431	0.200972	*	0.073359	GO:0005634//nucleus;GO:0000417//HIR complex;GO:0000790//nuclear chromatin;GO:0000775//chromosome, centromeric region	GO:0003714//transcription corepressor activity;GO:0042802//identical protein binding	GO:0006355//regulation of transcription, DNA-templated;GO:0006351//transcription, DNA-templated;GO:0030702//chromatin silencing at centromere;GO:0000122//negative regulation of transcription by RNA polymerase II;GO:0006368//transcription elongation from RNA polymerase II promoter;GO:0000070//mitotic sister chromatid segregation;GO:0006325//chromatin organization;GO:0006336//DNA replication-indepe…	K11293//protein HIRA/HIR1	NP_009545.2//Hir1p [Saccharomyces cerevisiae S288C]
BK006947.3_mrna_5062	780	7967.72	4330.02	-0.879795	1.3642e-06	*	8.08244e-08	GO:0005739//mitochondrion	GO:0046872//metal ion binding;GO:0016787//hydrolase activity;GO:0003824//catalytic activity	NA	K01557//acylpyruvate hydrolase [EC:3.7.1.5]	NP_014231.1//Fmp41p [Saccharomyces cerevisiae S288C]
BK006943.2_mrna_3306	2166	8203.08	5013.07	-0.710472	2.62179e-05	*	1.87804e-06	GO:0031310//intrinsic component of vacuolar membrane;GO:0000329//fungal-type vacuole membrane;GO:0005783//endoplasmic reticulum;GO:0033254//vacuolar transporter chaperone complex;GO:0016021//integral component of membrane;GO:0071944//cell periphery	GO:0008976//polyphosphate kinase activity;GO:0000822//inositol hexakisphosphate binding;GO:0005516//calmodulin binding	GO:0006799//polyphosphate biosynthetic process;GO:0006797//polyphosphate metabolic process;GO:0016237//lysosomal microautophagy;GO:0048016//inositol phosphate-mediated signaling;GO:0042144//vacuole fusion, non-autophagic;GO:0007034//vacuolar transport	K02212//DNA replication licensing factor MCM4 [EC:3.6.4.12]	NP_012522.2//Vtc4p [Saccharomyces cerevisiae S288C]
BK006946.2_mrna_4667	1389	1356.27	1447.8	0.094224	0.725648	*	0.530847	GO:0005634//nucleus;GO:0005737//cytoplasm	GO:0000978//RNA polymerase II proximal promoter sequence-specific DNA binding	GO:0072363//regulation of glycolytic process by positive regulation of transcription from RNA polymerase II promoter;GO:0060963//positive regulation of ribosomal protein gene transcription by RNA polymerase II	K19815//high-osmolarity-induced transcription protein 1	NP_013829.1//hypothetical protein YMR111C [Saccharomyces cerevisiae S288C]
BK006941.2_mrna_2483	333	1000.32	958.484	-0.0616286	0.845118	*	0.710889	GO:0005763//mitochondrial small ribosomal subunit;GO:0005739//mitochondrion	GO:0003735//structural constituent of ribosome	GO:0032543//mitochondrial translation	K17411//small subunit ribosomal protein S33	NP_011731.3//mitochondrial 37S ribosomal protein RSM27 [Saccharomyces cerevisiae S288C]
BK006938.2_mrna_865	2232	1551.36	1569	0.0163075	0.960923	*	0.917216	GO:0005783//endoplasmic reticulum;GO:0016021//integral component of membrane;GO:0097582//dolichyl-phosphate-mannose-protein mannosyltransferase Pmt1p-Pmt2p dimer complex;GO:0097585//dolichyl-phosphate-mannose-protein mannosyltransferase Pmt5p-Pmt3p dimer complex;GO:0097584//dolichyl-phosphate-mannose-protein mannosyltransferase Pmt5p-Pmt2p dimer complex	GO:0000030//mannosyltransferase activity;GO:0004169//dolichyl-phosphate-mannose-protein mannosyltransferase activity	GO:0035269//protein O-linked mannosylation;GO:0006493//protein O-linked glycosylation;GO:0031505//fungal-type cell wall organization	K00728//dolichyl-phosphate-mannose-protein mannosyltransferase [EC:2.4.1.109]	NP_010190.1//putative dolichyl-phosphate-mannose-protein mannosyltransferase PMT5 [Saccharomyces cerevisiae S288C]
BK006949.2_mrna_5945	858	5272.35	6418.65	0.283824	0.178918	*	0.0612722	GO:0043614//multi-eIF complex;GO:0016282//eukaryotic 43S preinitiation complex;GO:0005850//eukaryotic translation initiation factor 2 complex	GO:0003743//translation initiation factor activity;GO:0003729//mRNA binding;GO:0046872//metal ion binding;GO:0031369//translation initiation factor binding	GO:0001731//formation of translation preinitiation complex	K03238//translation initiation factor 2 subunit 2	NP_015087.1//translation initiation factor eIF2 subunit beta [Saccharomyces cerevisiae S288C]
BK006949.2_mrna_6213	543	9369.47	9843.7	0.0712338	0.820284	*	0.659811	GO:0071782//endoplasmic reticulum tubular network;GO:0005783//endoplasmic reticulum;GO:0005934//cellular bud tip;GO:0071944//cell periphery;GO:0000139//Golgi membrane;GO:0016021//integral component of membrane;GO:0005789//endoplasmic reticulum membrane;GO:0005933//cellular bud	NA	GO:0032581//ER-dependent peroxisome organization;GO:0034976//response to endoplasmic reticulum stress;GO:0048309//endoplasmic reticulum inheritance;GO:0016192//vesicle-mediated transport;GO:0051292//nuclear pore complex assembly;GO:0071786//endoplasmic reticulum tubular network organization;GO:0007029//endoplasmic reticulum organization	K17279//receptor expression-enhancing protein 5/6	NP_015353.1//Yop1p [Saccharomyces cerevisiae S288C]
BK006944.2_mrna_3718	1347	5062.4	4488.85	-0.173475	0.433235	*	0.22695	GO:0016020//membrane;GO:0043231//intracellular membrane-bounded organelle;GO:0019898//extrinsic component of membrane;GO:0005829//cytosol;GO:0032541//cortical endoplasmic reticulum;GO:0005789//endoplasmic reticulum membrane;GO:0005737//cytoplasm	GO:0032934//sterol binding;GO:0070300//phosphatidic acid binding;GO:0010314//phosphatidylinositol-5-phosphate binding;GO:0015248//sterol transporter activity;GO:0008289//lipid binding;GO:0080025//phosphatidylinositol-3,5-bisphosphate binding;GO:0070273//phosphatidylinositol-4-phosphate binding;GO:0008142//oxysterol binding;GO:0043325//phosphatidylinositol-3,4-bisphosphate binding;GO:0001786//phos…	GO:0015918//sterol transport;GO:0034727//piecemeal microautophagy of the nucleus;GO:0055092//sterol homeostasis;GO:0015914//phospholipid transport;GO:0006897//endocytosis;GO:0016125//sterol metabolic process;GO:0006887//exocytosis;GO:0030011//maintenance of cell polarity	K02849;K22285//oxysterol-binding protein-related protein 8	NP_012928.1//oxysterol-binding protein OSH6 [Saccharomyces cerevisiae S288C]
BK006941.2_mrna_2113	1143	1038.63	1470.32	0.501442	0.00363005	*	0.000421025	GO:0005783//endoplasmic reticulum;GO:0030176//integral component of endoplasmic reticulum membrane;GO:0016021//integral component of membrane;GO:0005789//endoplasmic reticulum membrane	NA	GO:0008654//phospholipid biosynthetic process;GO:0019915//lipid storage;GO:0006644//phospholipid metabolic process;GO:0034389//lipid droplet organization	K07407//alpha-galactosidase [EC:3.2.1.22]	NP_011389.3//Scs3p [Saccharomyces cerevisiae S288C]
BK006944.2_mrna_3522	1200	2959.25	2357.48	-0.327984	0.245389	*	0.0973451	GO:0044732//mitotic spindle pole body;GO:0043332//mating projection tip;GO:0000131//incipient cellular bud site;GO:0005933//cellular bud	NA	GO:0023014//signal transduction by protein phosphorylation;GO:0007118//budding cell apical bud growth;GO:0000920//septum digestion after cytokinesis;GO:0006355//regulation of transcription, DNA-templated	K08272//calcium binding protein 39	NP_012732.1//Hym1p [Saccharomyces cerevisiae S288C]
BK006934.2_mrna_2795	1515	1302.32	1520.54	0.223503	0.448153	*	0.23979	GO:0005737//cytoplasm	NA	NA	NA	NP_012029.1//Tda11p [Saccharomyces cerevisiae S288C]
BK006938.2_mrna_930	249	30.1099	17.5649	-0.777545	0.178918	*	0.0612964	GO:0005829//cytosol	NA	NA	NA	NP_001257670.1//hypothetical protein YDL022C-A [Saccharomyces cerevisiae S288C]
BK006939.2_mrna_1608	1893	3655.71	3873.01	0.0833029	0.74256	*	0.552415	GO:0016020//membrane;GO:0005794//Golgi apparatus;GO:0016021//integral component of membrane;GO:0000139//Golgi membrane	GO:0102491//dGTP phosphohydrolase activity;GO:0005524//ATP binding;GO:0102490//8-oxo-dGTP phosphohydrolase activity;GO:0102486//dCTP phosphohydrolase activity;GO:0102488//dTTP phosphohydrolase activity;GO:0016787//hydrolase activity;GO:0017111//nucleoside-triphosphatase activity;GO:0043262//adenosine-diphosphatase activity;GO:0102489//GTP phosphohydrolase activity;GO:0016887//ATPase activity;GO:0…	GO:0006486//protein glycosylation;GO:0006665//sphingolipid metabolic process	K14642//golgi apyrase [EC:3.6.1.5]	NP_010920.3//apyrase [Saccharomyces cerevisiae S288C]
BK006936.2_mrna_489	840	1931.6	2954.14	0.612942	0.0105521	*	0.00151173	GO:0000172//ribonuclease MRP complex;GO:0005634//nucleus;GO:0030677//ribonuclease P complex;GO:0005655//nucleolar ribonuclease P complex	GO:0033204//ribonuclease P RNA binding;GO:0003723//RNA binding;GO:0042134//rRNA primary transcript binding;GO:0000171//ribonuclease MRP activity;GO:0004526//ribonuclease P activity;GO:0004540//ribonuclease activity	GO:0034965//intronic box C/D snoRNA processing;GO:0090502//RNA phosphodiester bond hydrolysis, endonucleolytic;GO:0000294//nuclear-transcribed mRNA catabolic process, endonucleolytic cleavage-dependent decay;GO:0006364//rRNA processing;GO:0008033//tRNA processing	K03538//ribonuclease P protein subunit POP4 [EC:3.1.26.5]	NP_009816.1//RNase P/RNase MRP complex subunit [Saccharomyces cerevisiae S288C]
BK006941.2_mrna_2058	1398	11674.7	17520.5	0.585653	0.1603	*	0.0525837	GO:0005634//nucleus;GO:0005777//peroxisome;GO:0005737//cytoplasm	GO:0004121//cystathionine beta-lyase activity;GO:0016846//carbon-sulfur lyase activity;GO:0030170//pyridoxal phosphate binding;GO:0047804//cysteine-S-conjugate beta-lyase activity	GO:0019346//transsulfuration;GO:0071266//'de novo' L-methionine biosynthetic process;GO:0009086//methionine biosynthetic process	K01760//cysteine-S-conjugate beta-lyase [EC:4.4.1.13]	EDZ72299.1//YGL184Cp-like protein, partial [Saccharomyces cerevisiae AWRI1631]
BK006947.3_mrna_5311	4002	1087.48	968.905	-0.166559	0.590501	*	0.376435	GO:0005829//cytosol;GO:0016021//integral component of membrane;GO:0005739//mitochondrion;GO:0005886//plasma membrane	GO:0005524//ATP binding;GO:0042626//ATPase activity, coupled to transmembrane movement of substances;GO:0008559//xenobiotic transmembrane transporting ATPase activity	GO:0055092//sterol homeostasis;GO:0055085//transmembrane transport;GO:0035376//sterol import;GO:0042493//response to drug;GO:0015893//drug transport	K08712//ATP-binding cassette, subfamily G (WHITE), member 2, SNQ2	NP_014468.3//ATP-binding cassette multidrug transporter PDR18 [Saccharomyces cerevisiae S288C]
BK006938.2_mrna_1078	303	62.6289	31.604	-0.98672	0.0935049	*	0.0250077	GO:0016021//integral component of membrane	NA	NA	NA	NP_010399.3//hypothetical protein YDR114C [Saccharomyces cerevisiae S288C]
BK006937.2_mrna_647	6504	2953.6	2663.1	-0.149369	0.541313	*	0.324703	GO:0000329//fungal-type vacuole membrane;GO:0019898//extrinsic component of membrane;GO:0005829//cytosol;GO:0005739//mitochondrion	NA	GO:0006886//intracellular protein transport;GO:0009268//response to pH;GO:0031505//fungal-type cell wall organization	K22262//WD repeat and FYVE domain-containing protein 3	NP_009961.2//Bph1p [Saccharomyces cerevisiae S288C]
BK006942.2_mrna_3010	1119	3754.87	5062.35	0.431043	0.0267653	*	0.00480655	GO:0005654//nucleoplasm;GO:0005956//protein kinase CK2 complex;GO:0034456//UTP-C complex	GO:0004674//protein serine/threonine kinase activity;GO:0005524//ATP binding;GO:0004672//protein kinase activity	GO:0006359//regulation of transcription by RNA polymerase III;GO:0006468//protein phosphorylation;GO:0006356//regulation of transcription by RNA polymerase I;GO:0007535//donor selection;GO:0018107//peptidyl-threonine phosphorylation;GO:0031167//rRNA methylation;GO:0018105//peptidyl-serine phosphorylation;GO:0006974//cellular response to DNA damage stimulus	K03097//casein kinase II subunit alpha [EC:2.7.11.1]	NP_012229.1//casein kinase 2 catalytic subunit CKA1 [Saccharomyces cerevisiae S288C]
BK006939.2_mrna_1642	3231	1079.41	1158.68	0.102242	0.836714	*	0.69664	GO:0043332//mating projection tip;GO:0005934//cellular bud tip;GO:0005739//mitochondrion;GO:0005737//cytoplasm;GO:0005935//cellular bud neck;GO:0005933//cellular bud	NA	GO:0031505//fungal-type cell wall organization	K21627//protein IFH1;K11294//nucleolin	NP_010950.1//Zrg8p [Saccharomyces cerevisiae S288C]
BK006942.2_mrna_3034	342	4.24248	5.34051	0.332067	0.714335	*	0.517071	NA	NA	NA	NA	NP_001335785.1//hypothetical protein YIL012W [Saccharomyces cerevisiae S288C]
BK006942.2_mrna_2961	1554	2174.79	2842.6	0.38634	0.0134331	*	0.00200091	GO:0005794//Golgi apparatus;GO:0016021//integral component of membrane	GO:0000026//alpha-1,2-mannosyltransferase activity;GO:0000030//mannosyltransferase activity	GO:0000032//cell wall mannoprotein biosynthetic process;GO:0006487//protein N-linked glycosylation;GO:0031505//fungal-type cell wall organization	K03854//mannosyltransferase [EC:2.4.1.-]	NP_012181.3//putative mannosyltransferase [Saccharomyces cerevisiae S288C]
BK006934.2_mrna_2566	708	1126.71	1226.7	0.122667	0.785191	*	0.610031	GO:0005783//endoplasmic reticulum;GO:0005794//Golgi apparatus;GO:0016021//integral component of membrane;GO:0005886//plasma membrane	NA	GO:0016050//vesicle organization	NA	NP_011819.1//DUP240 family protein [Saccharomyces cerevisiae S288C]
BK006948.2_mrna_5812	1536	1472.39	2523.55	0.777296	0.0276009	*	0.00500281	GO:0005654//nucleoplasm;GO:0030686//90S preribosome;GO:0032040//small-subunit processome;GO:0005730//nucleolus;GO:0031428//box C/D snoRNP complex	GO:0030515//snoRNA binding;GO:0003729//mRNA binding;GO:0017069//snRNA binding	GO:0031167//rRNA methylation;GO:0000472//endonucleolytic cleavage to generate mature 5'-end of SSU-rRNA from (SSU-rRNA, 5.8S rRNA, LSU-rRNA);GO:0000447//endonucleolytic cleavage in ITS1 to separate SSU-rRNA from 5.8S rRNA and LSU-rRNA from tricistronic rRNA transcript (SSU-rRNA, 5.8S rRNA, LSU-rRNA);GO:0006364//rRNA processing;GO:0000451//rRNA 2'-O-methylation;GO:1902570//protein localization to …	K14565//nucleolar protein 58	EGA60540.1//Nop58p [Saccharomyces cerevisiae FostersO]
BK006938.2_mrna_1124	2175	2937.09	2688.38	-0.127653	0.648954	*	0.439225	GO:0005934//cellular bud tip;GO:0071944//cell periphery;GO:0005886//plasma membrane;GO:0005935//cellular bud neck	GO:0000149//SNARE binding	GO:0031340//positive regulation of vesicle fusion;GO:0006904//vesicle docking involved in exocytosis;GO:0015031//protein transport;GO:0006887//exocytosis	K15292//syntaxin-binding protein 1	NP_010448.1//Sec1p [Saccharomyces cerevisiae S288C]
BK006938.2_mrna_1055	462	3184.04	3264.98	0.0362147	0.92432	*	0.843103	GO:0031371//ubiquitin conjugating enzyme complex;GO:0005634//nucleus;GO:0005737//cytoplasm	GO:0061630//ubiquitin protein ligase activity;GO:0005524//ATP binding;GO:0016740//transferase activity;GO:0061631//ubiquitin conjugating enzyme activity	GO:0070534//protein K63-linked ubiquitination;GO:0120113//protein localization by the NVT pathway;GO:0010994//free ubiquitin chain polymerization;GO:0006513//protein monoubiquitination;GO:0070914//UV-damage excision repair;GO:0000209//protein polyubiquitination;GO:0006301//postreplication repair	K10580//ubiquitin-conjugating enzyme E2 N [EC:2.3.2.23]	NP_010377.3//E2 ubiquitin-conjugating protein UBC13 [Saccharomyces cerevisiae S288C]
BK006943.2_mrna_3221	2622	4664.5	4475.9	-0.0595435	0.852849	*	0.720533	GO:0005783//endoplasmic reticulum;GO:0005794//Golgi apparatus;GO:0016021//integral component of membrane;GO:0005739//mitochondrion	GO:0015386//potassium:proton antiporter activity;GO:0015299//solute:proton antiporter activity	GO:0015672//monovalent inorganic cation transport	NA	NP_012441.1//Kha1p [Saccharomyces cerevisiae S288C]
BK006946.2_mrna_4567	1527	5546.74	6026.12	0.119591	0.678958	*	0.474873	GO:0005737//cytoplasm	GO:0052901//spermine:oxygen oxidoreductase (spermidine-forming) activity;GO:0052904//N1-acetylspermidine:oxygen oxidoreductase (3-acetamidopropanal-forming) activity;GO:0046592//polyamine oxidase activity;GO:0052902//spermidine:oxygen oxidoreductase (3-aminopropanal-forming) activity;GO:0052903//N1-acetylspermine:oxygen oxidoreductase (3-acetamidopropanal-forming) activity;GO:0016491//oxidoreduct…	GO:0015940//pantothenate biosynthetic process;GO:0046208//spermine catabolic process	K13367//polyamine oxidase [EC:1.5.3.17]	NP_013733.1//polyamine oxidase [Saccharomyces cerevisiae S288C]
BK006935.2_mrna_90	225	19.6521	45.9338	1.22487	0.0205333	Up	0.00342279	GO:0005783//endoplasmic reticulum;GO:0005794//Golgi apparatus;GO:0016021//integral component of membrane;GO:0005886//plasma membrane;GO:0005737//cytoplasm	NA	GO:0016050//vesicle organization	NA	NP_009416.1//DUP240 family protein [Saccharomyces cerevisiae S288C]
BK006948.2_mrna_5740	912	3258.56	3304.52	0.0202098	0.951574	*	0.900719	GO:0005737//cytoplasm	NA	NA	K20457//dihydrofolate synthase [EC:6.3.2.12]	NP_014881.2//hypothetical protein YOR238W [Saccharomyces cerevisiae S288C]
BK006938.2_mrna_893	1029	1850.85	1825.53	-0.0198753	0.95529	*	0.906846	GO:0005783//endoplasmic reticulum;GO:0005829//cytosol;GO:0005777//peroxisome;GO:1990415//Pex17p-Pex14p docking complex;GO:0005789//endoplasmic reticulum membrane;GO:0005778//peroxisomal membrane	GO:0033328//peroxisome membrane targeting sequence binding	GO:0045033//peroxisome inheritance;GO:0032527//protein exit from endoplasmic reticulum;GO:0032581//ER-dependent peroxisome organization;GO:0045046//protein import into peroxisome membrane;GO:0050821//protein stabilization	K13337//peroxin-19	CAA98630.1//PEX19 [Saccharomyces cerevisiae]
BK006938.2_mrna_838	423	951.971	748.38	-0.347148	0.118759	*	0.0347235	GO:0000329//fungal-type vacuole membrane;GO:0016021//integral component of membrane;GO:0000328//fungal-type vacuole lumen	NA	NA	NA	NP_010160.1//Sna4p [Saccharomyces cerevisiae S288C]
BK006938.2_mrna_1266	1050	4281.9	2005.28	-1.09444	1.78614e-10	Down	6.9951e-12	GO:0016021//integral component of membrane;GO:0005789//endoplasmic reticulum membrane	GO:0042284//sphingolipid delta-4 desaturase activity;GO:0000170//sphingosine hydroxylase activity;GO:0005506//iron ion binding;GO:0016491//oxidoreductase activity	GO:0006665//sphingolipid metabolic process;GO:0006675//mannosyl-inositol phosphorylceramide metabolic process;GO:0030148//sphingolipid biosynthetic process;GO:0008610//lipid biosynthetic process	K04713//sphinganine C4-monooxygenase [EC:1.14.18.5]	NP_010583.1//sphingosine hydroxylase [Saccharomyces cerevisiae S288C]
BK006942.2_mrna_2968	963	1182.08	1861.59	0.655205	2.58147e-05	*	1.84483e-06	GO:0016021//integral component of membrane;GO:0005739//mitochondrion;GO:0031966//mitochondrial membrane	NA	NA	NA	NP_012188.3//hypothetical protein YIL077C [Saccharomyces cerevisiae S288C]
BK006938.2_mrna_721	1704	1443.87	795.422	-0.860149	1.40388e-05	*	9.54627e-07	GO:0005887//integral component of plasma membrane;GO:0016021//integral component of membrane;GO:0071944//cell periphery;GO:0005886//plasma membrane	GO:0015149//hexose transmembrane transporter activity;GO:0005353//fructose transmembrane transporter activity;GO:0015578//mannose transmembrane transporter activity;GO:0005355//glucose transmembrane transporter activity;GO:0005351//carbohydrate:proton symporter activity;GO:0022857//transmembrane transporter activity	GO:0055085//transmembrane transport;GO:0015797//mannitol transport;GO:0015795//sorbitol transport;GO:0008645//hexose transmembrane transport;GO:1902341//xylitol transport;GO:0098704//carbohydrate import across plasma membrane	K08139//MFS transporter, SP family, sugar:H+ symporter	NP_010036.1//hexose transporter HXT15 [Saccharomyces cerevisiae S288C]
BK006944.2_mrna_3509	7425	1850.12	1673.19	-0.145016	0.738827	*	0.548477	GO:0031931//TORC1 complex;GO:0005634//nucleus;GO:0000329//fungal-type vacuole membrane;GO:0031932//TORC2 complex;GO:0031234//extrinsic component of cytoplasmic side of plasma membrane;GO:0005739//mitochondrion;GO:0005886//plasma membrane	GO:0004674//protein serine/threonine kinase activity;GO:0005524//ATP binding;GO:0044877//protein-containing complex binding;GO:0004430//1-phosphatidylinositol 4-kinase activity	GO:0001558//regulation of cell growth;GO:0031929//TOR signaling;GO:0007165//signal transduction;GO:0030037//actin filament reorganization involved in cell cycle;GO:0038202//TORC1 signaling;GO:0006468//protein phosphorylation;GO:0045807//positive regulation of endocytosis;GO:0030950//establishment or maintenance of actin cytoskeleton polarity;GO:0042254//ribosome biogenesis;GO:0035025//positive re…	K07203//serine/threonine-protein kinase mTOR [EC:2.7.11.1]	CAA82048.1//TOR2 [Saccharomyces cerevisiae]
BK006938.2_mrna_1350	573	3564.66	3534.19	-0.012385	0.965563	*	0.928718	GO:0033101//cellular bud membrane;GO:0005829//cytosol;GO:0005886//plasma membrane;GO:0000139//Golgi membrane	GO:0098744//1-phosphatidylinositol 4-kinase activator activity;GO:0005509//calcium ion binding;GO:0008047//enzyme activator activity	GO:1905949//negative regulation of calcium ion import across plasma membrane;GO:0035584//calcium-mediated signaling using intracellular calcium source;GO:0009966//regulation of signal transduction;GO:0043128//positive regulation of 1-phosphatidylinositol 4-kinase activity	K19932//neuronal calcium sensor 1	NP_010661.3//frequenin [Saccharomyces cerevisiae S288C]
BK006941.2_mrna_2247	2235	4192.61	3730.73	-0.16839	0.528504	*	0.313211	GO:0080008//Cul4-RING E3 ubiquitin ligase complex;GO:0005634//nucleus;GO:0005737//cytoplasm;GO:0031463//Cul3-RING ubiquitin ligase complex;GO:0019005//SCF ubiquitin ligase complex;GO:0031461//cullin-RING ubiquitin ligase complex	GO:0031625//ubiquitin protein ligase binding;GO:0004842//ubiquitin-protein transferase activity	GO:0006511//ubiquitin-dependent protein catabolic process;GO:0043161//proteasome-mediated ubiquitin-dependent protein catabolic process;GO:0031146//SCF-dependent proteasomal ubiquitin-dependent protein catabolic process;GO:0006974//cellular response to DNA damage stimulus	K03869//cullin 3	NP_011517.1//cullin CUL3 [Saccharomyces cerevisiae S288C]
BK006936.2_mrna_108	3033	1118.62	1201.04	0.102568	0.82181	*	0.662859	GO:0005886//plasma membrane;GO:0005737//cytoplasm;GO:0005935//cellular bud neck	GO:0019905//syntaxin binding;GO:0017137//Rab GTPase binding;GO:0005096//GTPase activator activity	GO:0030010//establishment of cell polarity;GO:0017157//regulation of exocytosis;GO:0006893//Golgi to plasma membrane transport;GO:0006887//exocytosis	K08518//syntaxin-binding protein 5	NP_009444.2//putative Rab GTPase-binding protein SRO77 [Saccharomyces cerevisiae S288C]
BK006943.2_mrna_3345	5269	11916.5	9909.05	-0.266144	0.567271	*	0.350237	GO:0000943//retrotransposon nucleocapsid;GO:0005634//nucleus;GO:0005737//cytoplasm	GO:0003723//RNA binding;GO:0003677//DNA binding;GO:0008233//peptidase activity;GO:0005524//ATP binding;GO:0004523//RNA-DNA hybrid ribonuclease activity;GO:0004190//aspartic-type endopeptidase activity;GO:0003964//RNA-directed DNA polymerase activity;GO:0003887//DNA-directed DNA polymerase activity;GO:0046872//metal ion binding;GO:0004540//ribonuclease activity	GO:0015074//DNA integration;GO:0032197//transposition, RNA-mediated;GO:0006310//DNA recombination	K14835//25S rRNA (cytosine2870-C5)-methyltransferase [EC:2.1.1.310]	CAA89553.1//TY1B [Saccharomyces cerevisiae]
BK006948.2_mrna_5429	1491	3641.05	3233.73	-0.171152	0.456554	*	0.247995	GO:0002189//ribose phosphate diphosphokinase complex;GO:0005737//cytoplasm	GO:0000287//magnesium ion binding;GO:0004749//ribose phosphate diphosphokinase activity;GO:0005524//ATP binding;GO:0016301//kinase activity	GO:0009116//nucleoside metabolic process;GO:0009165//nucleotide biosynthetic process;GO:0009156//ribonucleoside monophosphate biosynthetic process;GO:0006164//purine nucleotide biosynthetic process;GO:0031505//fungal-type cell wall organization;GO:0006015//5-phosphoribose 1-diphosphate biosynthetic process	K00948//ribose-phosphate pyrophosphokinase [EC:2.7.6.1]	NP_014580.1//ribose phosphate diphosphokinase subunit PRS5 [Saccharomyces cerevisiae S288C]
BK006943.2_mrna_3340	1050	1161.46	835.209	-0.475732	0.0986445	*	0.0270248	GO:0005782//peroxisomal matrix;GO:0005777//peroxisome;GO:0005739//mitochondrion	GO:0047617//acyl-CoA hydrolase activity;GO:0102991//myristoyl-CoA hydrolase activity;GO:0052689//carboxylic ester hydrolase activity;GO:0016290//palmitoyl-CoA hydrolase activity	GO:0019395//fatty acid oxidation;GO:0006635//fatty acid beta-oxidation;GO:0009062//fatty acid catabolic process;GO:0006637//acyl-CoA metabolic process	K01068//acyl-coenzyme A thioesterase 1/2/4 [EC:3.1.2.2]	NP_012553.3//Tes1p [Saccharomyces cerevisiae S288C]
BK006943.2_mrna_3179	945	1469.07	1954.41	0.411823	0.0356771	*	0.00702198	GO:0005743//mitochondrial inner membrane;GO:0016021//integral component of membrane;GO:0005739//mitochondrion	GO:0015093//ferrous iron transmembrane transporter activity;GO:0005381//iron ion transmembrane transporter activity;GO:0022857//transmembrane transporter activity	GO:0006397//mRNA processing;GO:0048250//iron import into the mitochondrion;GO:0008380//RNA splicing	K15113//solute carrier family 25 (mitochondrial iron transporter), member 28/37	NP_012402.1//Fe(2+) transporter [Saccharomyces cerevisiae S288C]
BK006949.2_mrna_6244	423	2346.76	1738.42	-0.432894	0.0368269	*	0.00732841	GO:0005783//endoplasmic reticulum;GO:0016021//integral component of membrane;GO:0005789//endoplasmic reticulum membrane	NA	NA	NA	NP_015388.1//hypothetical protein YPR063C [Saccharomyces cerevisiae S288C]
BK006934.2_mrna_2578	2130	1865.71	1308.14	-0.512202	0.200326	*	0.0728629	GO:0005739//mitochondrion;GO:0005737//cytoplasm	GO:0005524//ATP binding;GO:0004370//glycerol kinase activity	GO:0006071//glycerol metabolic process;GO:0016310//phosphorylation;GO:0006072//glycerol-3-phosphate metabolic process;GO:0019563//glycerol catabolic process;GO:0006641//triglyceride metabolic process;GO:0005975//carbohydrate metabolic process;GO:0046167//glycerol-3-phosphate biosynthetic process	K00864//glycerol kinase [EC:2.7.1.30]	NP_011831.1//glycerol kinase [Saccharomyces cerevisiae S288C]
BK006946.2_mrna_4769	669	16667.9	16708.2	0.00348168	0.990779	*	0.980664	GO:0005783//endoplasmic reticulum;GO:0016021//integral component of membrane;GO:0005789//endoplasmic reticulum membrane	GO:0016853//isomerase activity;GO:0000247//C-8 sterol isomerase activity	GO:0006696//ergosterol biosynthetic process	K09829//C-8 sterol isomerase [EC:5.-.-.-]	NP_013929.1//C-8 sterol isomerase ERG2 [Saccharomyces cerevisiae S288C]
BK006945.2_mrna_4250	723	1221.38	1458.36	0.255835	0.246698	*	0.0980597	GO:0016021//integral component of membrane;GO:0071944//cell periphery	NA	NA	NA	NP_013430.1//hypothetical protein YLR326W [Saccharomyces cerevisiae S288C]
BK006938.2_mrna_1168	2655	2088.73	2453.82	0.232404	0.34015	*	0.158604	GO:0000781//chromosome, telomeric region;GO:0005697//telomerase holoenzyme complex;GO:0000932//P-body;GO:0005737//cytoplasm	GO:0042162//telomeric DNA binding;GO:0070034//telomerase RNA binding	GO:0032210//regulation of telomere maintenance via telomerase;GO:0017148//negative regulation of translation;GO:0007004//telomere maintenance via telomerase;GO:0000184//nuclear-transcribed mRNA catabolic process, nonsense-mediated decay;GO:0006310//DNA recombination	K11132//telomere elongation protein [EC:2.7.7.-]	NP_010492.3//Ebs1p [Saccharomyces cerevisiae S288C]
BK006947.3_mrna_5011	1746	1960.73	2525.71	0.365299	0.147043	*	0.0467829	GO:0005824//outer plaque of spindle pole body;GO:0005816//spindle pole body	GO:0005200//structural constituent of cytoskeleton	GO:0030435//sporulation resulting in formation of a cellular spore;GO:0051321//meiotic cell cycle;GO:0051301//cell division;GO:0007052//mitotic spindle organization;GO:0007020//microtubule nucleation	K20361//intracellular protein transport protein USO1	NP_014174.1//Cnm67p [Saccharomyces cerevisiae S288C]
BK006947.3_mrna_4997	4779	3683.72	2100.11	-0.810696	0.00819688	*	0.00111121	GO:0005770//late endosome;GO:0019898//extrinsic component of membrane;GO:0005829//cytosol;GO:0000407//phagophore assembly site;GO:0061908//phagophore;GO:0005737//cytoplasm;GO:0097632//extrinsic component of phagophore assembly site membrane	GO:0032266//phosphatidylinositol-3-phosphate binding	GO:0032258//protein localization by the Cvt pathway;GO:0044805//late nucleophagy;GO:0030242//autophagy of peroxisome;GO:0061709//reticulophagy;GO:0034727//piecemeal microautophagy of the nucleus;GO:0000422//autophagy of mitochondrion;GO:0006914//autophagy;GO:0000045//autophagosome assembly;GO:0015031//protein transport	K17906//autophagy-related protein 2	NP_014157.1//Atg2p [Saccharomyces cerevisiae S288C]
BK006948.2_mrna_5432	1263	104594	103506	-0.0150915	0.979935	*	0.957466	GO:0005829//cytosol;GO:0005737//cytoplasm	GO:0005524//ATP binding;GO:0004055//argininosuccinate synthase activity	GO:0000053//argininosuccinate metabolic process;GO:0006526//arginine biosynthetic process;GO:0000050//urea cycle	K01940//argininosuccinate synthase [EC:6.3.4.5]	NP_014583.2//argininosuccinate synthase [Saccharomyces cerevisiae S288C]
BK006946.2_mrna_4620	1281	1163.9	1579.01	0.440051	0.0765309	*	0.0190335	GO:0005774//vacuolar membrane;GO:0005634//nucleus;GO:0031932//TORC2 complex;GO:0005829//cytosol;GO:0005886//plasma membrane;GO:0005737//cytoplasm	GO:0016301//kinase activity	GO:0001558//regulation of cell growth;GO:0031929//TOR signaling;GO:0031505//fungal-type cell wall organization;GO:0030950//establishment or maintenance of actin cytoskeleton polarity	K06867//uncharacterized protein	NP_013784.1//Avo2p [Saccharomyces cerevisiae S288C]
BK006936.2_mrna_533	1140	1248.68	1150.89	-0.117649	0.753862	*	0.56577	GO:0005768//endosome;GO:0000324//fungal-type vacuole;GO:0016021//integral component of membrane;GO:0005886//plasma membrane	NA	GO:0043328//protein transport to vacuole involved in ubiquitin-dependent protein catabolic process via the multivesicular body sorting pathway;GO:0006883//cellular sodium ion homeostasis	NA	NP_009861.1//Cos2p [Saccharomyces cerevisiae S288C]
BK006945.2_mrna_3859	2250	10014.2	8703.61	-0.202358	0.514762	*	0.301706	GO:0005829//cytosol;GO:0005737//cytoplasm	GO:0046872//metal ion binding;GO:0070006//metalloaminopeptidase activity	GO:0034396//negative regulation of transcription from RNA polymerase II promoter in response to iron	K01262//Xaa-Pro aminopeptidase [EC:3.4.11.9]	NP_013071.1//Fra1p [Saccharomyces cerevisiae S288C]
BK006944.2_mrna_3640	543	3099.53	2337.91	-0.406827	0.104551	*	0.0293032	GO:0005634//nucleus;GO:0005829//cytosol;GO:0005737//cytoplasm	GO:0033745//L-methionine-(R)-S-oxide reductase activity;GO:0070191//methionine-R-sulfoxide reductase activity	GO:0034599//cellular response to oxidative stress	K08968//L-methionine (R)-S-oxide reductase [EC:1.8.4.14]	PJP10717.1//L-methionine (R)-S-oxide reductase [Saccharomyces cerevisiae]
BK006947.3_mrna_5302	660	1951.19	1801.85	-0.114872	0.668351	*	0.463875	GO:0000329//fungal-type vacuole membrane;GO:0000324//fungal-type vacuole;GO:0016021//integral component of membrane;GO:0005737//cytoplasm	NA	NA	NA	NP_014459.1//hypothetical protein YNR061C [Saccharomyces cerevisiae S288C]
BK006941.2_mrna_2363	4645	23580.7	14096.7	-0.742251	0.0875112	*	0.0229506	GO:0000943//retrotransposon nucleocapsid;GO:0005634//nucleus;GO:0005737//cytoplasm	GO:0003964//RNA-directed DNA polymerase activity;GO:0003723//RNA binding;GO:0003887//DNA-directed DNA polymerase activity;GO:0003677//DNA binding;GO:0008233//peptidase activity;GO:0005524//ATP binding;GO:0004523//RNA-DNA hybrid ribonuclease activity;GO:0008270//zinc ion binding;GO:0004540//ribonuclease activity;GO:0004190//aspartic-type endopeptidase activity	GO:0015074//DNA integration;GO:0032197//transposition, RNA-mediated;GO:0006310//DNA recombination	K07497//putative transposase	AAA98435.1//POL3, partial [Saccharomyces cerevisiae]
BK006945.2_mrna_4296	393	494.811	2362.42	2.25532	2.25287e-29	Up	1.80983e-31	GO:0005840//ribosome;GO:0022627//cytosolic small ribosomal subunit	GO:0003735//structural constituent of ribosome	GO:0006412//translation;GO:0002181//cytoplasmic translation	K02957//small subunit ribosomal protein S15Ae	NP_013471.1//ribosomal 40S subunit protein S22B [Saccharomyces cerevisiae S288C]
BK006949.2_mrna_6331	915	2932.86	3248.86	0.147628	0.65873	*	0.452412	GO:0005811//lipid droplet;GO:0016021//integral component of membrane;GO:0005737//cytoplasm	GO:0004806//triglyceride lipase activity;GO:0016788//hydrolase activity, acting on ester bonds	GO:0019433//triglyceride catabolic process;GO:0044255//cellular lipid metabolic process	NA	NP_015473.1//hypothetical protein YPR147C [Saccharomyces cerevisiae S288C]
BK006938.2_mrna_766	2064	1659.1	1652.73	-0.00554929	0.988074	*	0.974679	GO:0016020//membrane;GO:0000329//fungal-type vacuole membrane;GO:0005887//integral component of plasma membrane;GO:0016021//integral component of membrane	GO:0022857//transmembrane transporter activity;GO:0005366//myo-inositol:proton symporter activity	GO:0055085//transmembrane transport	K15196//transcription factor IIIB 90 kDa subunit;K08139//MFS transporter, SP family, sugar:H+ symporter;K08150//MFS transporter, SP family, solute carrier family 2 (myo-inositol transporter), member 13	NP_010082.1//hypothetical protein YDL199C [Saccharomyces cerevisiae S288C]
BK006938.2_mrna_1004	696	5644.07	5867.34	0.0559688	0.925997	*	0.845098	GO:0005634//nucleus;GO:0031519//PcG protein complex;GO:0005667//transcription factor complex;GO:0000790//nuclear chromatin	GO:0000978//RNA polymerase II proximal promoter sequence-specific DNA binding;GO:0003677//DNA binding;GO:0001103//RNA polymerase II repressing transcription factor binding;GO:0003676//nucleic acid binding;GO:0001227//DNA-binding transcription repressor activity, RNA polymerase II-specific;GO:0046872//metal ion binding;GO:0043565//sequence-specific DNA binding;GO:0000980//RNA polymerase II distal …	GO:1900464//negative regulation of cellular hyperosmotic salinity response by negative regulation of transcription from RNA polymerase II promoter;GO:1900463//negative regulation of cellular response to alkaline pH by negative regulation of transcription from RNA polymerase II promoter;GO:0071475//cellular hyperosmotic salinity response;GO:0000433//carbon catabolite repression of transcription fr…	K09467//zinc-finger protein CreA/MIG	NP_010328.3//transcriptional regulator NRG1 [Saccharomyces cerevisiae S288C]
BK006946.2_mrna_4512	861	948.454	1084.45	0.193315	0.439735	*	0.232371	GO:0005840//ribosome;GO:0005762//mitochondrial large ribosomal subunit;GO:0005739//mitochondrion	GO:0003735//structural constituent of ribosome	GO:0032543//mitochondrial translation;GO:0006412//translation	K02926//large subunit ribosomal protein L4	NP_013687.1//mitochondrial 54S ribosomal protein YmL6 [Saccharomyces cerevisiae S288C]
BK006939.2_mrna_1526	588	1094.64	516.777	-1.08284	9.07256e-11	Down	3.462e-12	GO:0005634//nucleus;GO:0005739//mitochondrion;GO:0005737//cytoplasm	GO:0016746//transferase activity, transferring acyl groups;GO:0004402//histone acetyltransferase activity;GO:0047812//D-amino-acid N-acetyltransferase activity;GO:0008080//N-acetyltransferase activity	GO:0046416//D-amino acid metabolic process;GO:0006473//protein acetylation;GO:0070458//cellular detoxification of nitrogen compound	K18852//D-amino-acid N-acetyltransferase [EC:2.3.1.36]	NP_010847.1//hypothetical protein YEL067C [Saccharomyces cerevisiae S288C]
BK006947.3_mrna_5076	825	2403.32	2651.28	0.14166	0.639737	*	0.42849	GO:0005634//nucleus;GO:0000502//proteasome complex;GO:0005737//cytoplasm	GO:0008270//zinc ion binding;GO:0070628//proteasome binding	GO:0043161//proteasome-mediated ubiquitin-dependent protein catabolic process;GO:0071243//cellular response to arsenic-containing substance;GO:0035617//stress granule disassembly;GO:1903843//cellular response to arsenite ion	K07059//uncharacterized protein	NP_014244.1//Cuz1p [Saccharomyces cerevisiae S288C]
BK006945.2_mrna_4231	567	685.415	618.335	-0.148588	0.530624	*	0.314822	NA	GO:0005524//ATP binding;GO:0016740//transferase activity;GO:0019788//NEDD8 transferase activity	GO:0045116//protein neddylation	K10579//ubiquitin-conjugating enzyme E2 M	NP_013409.1//NEDD8-conjugating protein UBC12 [Saccharomyces cerevisiae S288C]
BK006937.2_mrna_608	1383	7410.82	54316	2.87367	4.66235e-46	Up	1.40456e-48	GO:0005759//mitochondrial matrix;GO:0005777//peroxisome;GO:0005739//mitochondrion;GO:0005737//cytoplasm	GO:0004108//citrate (Si)-synthase activity	GO:0006099//tricarboxylic acid cycle;GO:0006101//citrate metabolic process;GO:0006097//glyoxylate cycle;GO:0006537//glutamate biosynthetic process;GO:0005975//carbohydrate metabolic process	K01647//citrate synthase [EC:2.3.3.1]	NP_009931.1//citrate (Si)-synthase CIT2 [Saccharomyces cerevisiae S288C]
BK006947.3_mrna_5092	4794	2977.8	2773.45	-0.102568	0.82181	*	0.663206	GO:0005634//nucleus;GO:0000446//nucleoplasmic THO complex;GO:0000781//chromosome, telomeric region;GO:0000347//THO complex;GO:0000445//THO complex part of transcription export complex	GO:0003729//mRNA binding;GO:0003676//nucleic acid binding	GO:0006397//mRNA processing;GO:0006406//mRNA export from nucleus;GO:0034063//stress granule assembly;GO:0006283//transcription-coupled nucleotide-excision repair;GO:0031124//mRNA 3'-end processing;GO:0006368//transcription elongation from RNA polymerase II promoter;GO:0045943//positive regulation of transcription by RNA polymerase I;GO:2001209//positive regulation of transcription elongation from…	K12879//THO complex subunit 2	NP_014260.3//Tho2p [Saccharomyces cerevisiae S288C]
BK006943.2_mrna_3128	1761	6573.93	3956.77	-0.732432	3.20887e-06	*	1.99245e-07	GO:0005794//Golgi apparatus	GO:0000026//alpha-1,2-mannosyltransferase activity;GO:0016757//transferase activity, transferring glycosyl groups	GO:0006486//protein glycosylation;GO:0046354//mannan biosynthetic process;GO:0035268//protein mannosylation	K05536//alpha 1,2-mannosyltransferase [EC:2.4.1.-]	NP_012349.2//alpha-1,2-mannosyltransferase MNN5 [Saccharomyces cerevisiae S288C]
BK006941.2_mrna_2263	357	6186.26	4632.59	-0.41725	0.0993117	*	0.0272433	GO:0016020//membrane;GO:0000329//fungal-type vacuole membrane;GO:0016021//integral component of membrane;GO:0033180//proton-transporting V-type ATPase, V1 domain;GO:0000221//vacuolar proton-transporting V-type ATPase, V1 domain	GO:0042625//ATPase coupled ion transmembrane transporter activity;GO:0046961//proton-transporting ATPase activity, rotational mechanism	GO:0015991//ATP hydrolysis coupled proton transport;GO:0007035//vacuolar acidification	K02151//V-type H+-transporting ATPase subunit F	NP_011534.1//H(+)-transporting V1 sector ATPase subunit F [Saccharomyces cerevisiae S288C]
BK006945.2_mrna_4202	2340	1280.17	1535.01	0.26191	0.334412	*	0.154226	GO:0005847//mRNA cleavage and polyadenylation specificity factor complex;GO:0005849//mRNA cleavage factor complex	GO:0004521//endoribonuclease activity;GO:0003723//RNA binding;GO:0046872//metal ion binding;GO:0008409//5'-3' exonuclease activity	GO:0034247//snoRNA splicing;GO:0098789//pre-mRNA cleavage required for polyadenylation;GO:0031126//snoRNA 3'-end processing;GO:0006369//termination of RNA polymerase II transcription;GO:0008380//RNA splicing;GO:0006398//mRNA 3'-end processing by stem-loop binding and cleavage;GO:0006378//mRNA polyadenylation	K14403//cleavage and polyadenylation specificity factor subunit 3 [EC:3.1.27.-]	NP_013379.1//cleavage polyadenylation factor subunit YSH1 [Saccharomyces cerevisiae S288C]
BK006949.2_mrna_6187	885	1914.93	1702.38	-0.169742	0.621451	*	0.409065	GO:0005737//cytoplasm	NA	GO:0045944//positive regulation of transcription by RNA polymerase II;GO:0009651//response to salt stress	NA	NP_015330.1//Hal1p [Saccharomyces cerevisiae S288C]
BK006939.2_mrna_1689	381	1237.21	902.453	-0.455168	0.045215	*	0.0096711	GO:0042995//cell projection;GO:0030479//actin cortical patch;GO:0043332//mating projection tip;GO:0005737//cytoplasm	GO:0051015//actin filament binding	GO:0030837//negative regulation of actin filament polymerization	NA	NP_010994.3//Tda2p [Saccharomyces cerevisiae S288C]
BK006936.2_mrna_505	1584	1948.71	2249.06	0.206799	0.482192	*	0.269866	GO:0035861//site of double-strand break;GO:0005634//nucleus;GO:0000790//nuclear chromatin;GO:0005737//cytoplasm	GO:0004674//protein serine/threonine kinase activity;GO:0005524//ATP binding	GO:0033314//mitotic DNA replication checkpoint;GO:0007095//mitotic G2 DNA damage checkpoint;GO:0000077//DNA damage checkpoint;GO:0006468//protein phosphorylation;GO:1902402//signal transduction involved in mitotic DNA damage checkpoint;GO:0048478//replication fork protection	K02216//serine/threonine-protein kinase CHEK1 [EC:2.7.11.1]	NP_009833.1//serine/threonine protein kinase CHK1 [Saccharomyces cerevisiae S288C]
BK006942.2_mrna_2936	945	1712.3	1934.74	0.176206	0.561617	*	0.345054	GO:0034399//nuclear periphery;GO:0005816//spindle pole body;GO:0005737//cytoplasm;GO:0000775//chromosome, centromeric region;GO:0005935//cellular bud neck	GO:0046872//metal ion binding;GO:0019207//kinase regulator activity	GO:0051301//cell division;GO:0007096//regulation of exit from mitosis;GO:0006468//protein phosphorylation;GO:0007049//cell cycle	K06685//MOB kinase activator 1	NP_012160.2//Mob1p [Saccharomyces cerevisiae S288C]
BK006948.2_mrna_5402	834	2605	2138	-0.285019	0.134975	*	0.0414526	GO:0005783//endoplasmic reticulum;GO:0005623//cell	GO:0015035//protein disulfide oxidoreductase activity;GO:0003756//protein disulfide isomerase activity	GO:0006457//protein folding;GO:0045454//cell redox homeostasis	K09580//protein disulfide-isomerase A1 [EC:5.3.4.1]	NP_014553.1//protein disulfide isomerase MPD2 [Saccharomyces cerevisiae S288C]
BK006944.2_mrna_3747	5052	6289.86	3953.97	-0.669725	0.0252119	*	0.00445164	GO:0005768//endosome;GO:0005634//nucleus;GO:0005628//prospore membrane	GO:0004630//phospholipase D activity;GO:0032266//phosphatidylinositol-3-phosphate binding;GO:0070290//N-acylphosphatidylethanolamine-specific phospholipase D activity;GO:0035091//phosphatidylinositol binding	GO:0048017//inositol lipid-mediated signaling;GO:0016042//lipid catabolic process;GO:0006654//phosphatidic acid biosynthetic process;GO:0031321//ascospore-type prospore assembly;GO:0000753//cell morphogenesis involved in conjugation with cellular fusion;GO:0048870//cell motility;GO:0006644//phospholipid metabolic process;GO:0006887//exocytosis	K01115//phospholipase D1/2 [EC:3.1.4.4]	NP_012956.3//phospholipase D [Saccharomyces cerevisiae S288C]
BK006941.2_mrna_2517	1371	312.85	111.549	-1.48779	7.88914e-06	Down	5.24182e-07	GO:0005634//nucleus;GO:0000790//nuclear chromatin	GO:0000978//RNA polymerase II proximal promoter sequence-specific DNA binding;GO:0043565//sequence-specific DNA binding;GO:0003700//DNA-binding transcription factor activity	GO:0007124//pseudohyphal growth;GO:0061408//positive regulation of transcription from RNA polymerase II promoter in response to heat stress;GO:0034605//cellular response to heat	K09419//heat shock transcription factor, other eukaryote	NP_011765.1//Mga1p [Saccharomyces cerevisiae S288C]
BK006949.2_mrna_6218	1641	8767.43	7623.25	-0.201748	0.4381	*	0.231154	GO:0005829//cytosol;GO:0005739//mitochondrion;GO:0005737//cytoplasm	GO:0003729//mRNA binding;GO:0004821//histidine-tRNA ligase activity;GO:0005524//ATP binding;GO:0004812//aminoacyl-tRNA ligase activity	GO:0032543//mitochondrial translation;GO:0006427//histidyl-tRNA aminoacylation	K01892//histidyl-tRNA synthetase [EC:6.1.1.21]	NP_015358.1//histidine--tRNA ligase [Saccharomyces cerevisiae S288C]
BK006946.2_mrna_4709	573	2024.94	2294.98	0.180607	0.570626	*	0.354141	GO:0042720//mitochondrial inner membrane peptidase complex;GO:0005743//mitochondrial inner membrane;GO:0016021//integral component of membrane;GO:0005739//mitochondrion	GO:0004175//endopeptidase activity;GO:0008236//serine-type peptidase activity	GO:0006627//protein processing involved in protein targeting to mitochondrion	K09647//mitochondrial inner membrane protease subunit 1 [EC:3.4.21.-]	NP_013870.1//endopeptidase catalytic subunit IMP1 [Saccharomyces cerevisiae S288C]
BK006936.2_mrna_523	1425	5429.27	11495.3	1.08221	0.0149295	Up	0.00229626	GO:0000329//fungal-type vacuole membrane;GO:0005783//endoplasmic reticulum;GO:0016021//integral component of membrane	GO:0015174//basic amino acid transmembrane transporter activity	GO:0090513//L-histidine transmembrane import into vacuole;GO:0015802//basic amino acid transport;GO:0055085//transmembrane transport;GO:1990591//asparagine transmembrane import into vacuole;GO:0110101//L-valine transmembrane import into vacuole;GO:0090517//L-lysine transmembrane import into vacuole;GO:0090518//L-arginine transmembrane import into vacuole	K22134//MFS transporter, DHA2 family, glioxin efflux transporter;K10866//DNA repair protein RAD50 [EC:3.6.-.-]	NP_009852.3//Vba2p [Saccharomyces cerevisiae S288C]
BK006945.2_mrna_4268	1434	756.599	515.002	-0.554951	0.0562232	*	0.0127314	GO:0005622//intracellular;GO:0005737//cytoplasm	NA	GO:0030476//ascospore wall assembly;GO:0032120//ascospore-type prospore membrane assembly;GO:0030437//ascospore formation	NA	NP_013445.1//Spo77p [Saccharomyces cerevisiae S288C]
BK006944.2_mrna_3535	2487	4260.53	4419.42	0.0528241	0.861172	*	0.732897	GO:0005774//vacuolar membrane;GO:1990877//Lst4-Lst7 complex;GO:0005829//cytosol;GO:0005737//cytoplasm	GO:0005096//GTPase activator activity	GO:1904263//positive regulation of TORC1 signaling;GO:0006865//amino acid transport;GO:0043547//positive regulation of GTPase activity;GO:0015031//protein transport	NA	NP_012745.1//Lst4p [Saccharomyces cerevisiae S288C]
BK006936.2_mrna_148	2244	1908.67	1499.1	-0.34847	0.0604022	*	0.0139506	GO:0005623//cell	GO:0004843//thiol-dependent ubiquitin-specific protease activity;GO:0004197//cysteine-type endopeptidase activity;GO:0036459//thiol-dependent ubiquitinyl hydrolase activity	GO:0006511//ubiquitin-dependent protein catabolic process;GO:0016579//protein deubiquitination;GO:0010995//free ubiquitin chain depolymerization	K11872//ubiquitin carboxyl-terminal hydrolase 9/13 [EC:3.4.19.12]	NP_009486.3//ubiquitin-specific protease UBP13 [Saccharomyces cerevisiae S288C]
BK006948.2_mrna_5649	1551	3172.34	3000.89	-0.0801554	0.823578	*	0.667194	GO:0005783//endoplasmic reticulum;GO:0016021//integral component of membrane;GO:0005789//endoplasmic reticulum membrane	GO:0016757//transferase activity, transferring glycosyl groups;GO:0000030//mannosyltransferase activity;GO:0004584//dolichyl-phosphate-mannose-glycolipid alpha-mannosyltransferase activity	GO:0006506//GPI anchor biosynthetic process;GO:0006276//plasmid maintenance	K08098//phosphatidylinositol glycan, class Z [EC:2.4.1.-]	NP_014792.4//glycosylphosphatidylinositol-alpha 1,2 mannosyltransferase [Saccharomyces cerevisiae S288C]
BK006941.2_mrna_2493	1347	4587.2	4622.91	0.0111855	0.976461	*	0.949986	GO:0000329//fungal-type vacuole membrane;GO:0000324//fungal-type vacuole;GO:0019898//extrinsic component of membrane;GO:0031902//late endosome membrane;GO:0005737//cytoplasm;GO:0005768//endosome;GO:0005829//cytosol;GO:0034045//phagophore assembly site membrane	GO:0080025//phosphatidylinositol-3,5-bisphosphate binding;GO:0070273//phosphatidylinositol-4-phosphate binding;GO:0032266//phosphatidylinositol-3-phosphate binding;GO:0010314//phosphatidylinositol-5-phosphate binding	GO:0034497//protein localization to phagophore assembly site;GO:0006497//protein lipidation;GO:0000045//autophagosome assembly;GO:0034727//piecemeal microautophagy of the nucleus;GO:0000422//autophagy of mitochondrion	K22991//WD repeat-containing protein 45;K17908//autophagy-related protein 18	NP_011739.1//Hsv2p [Saccharomyces cerevisiae S288C]
BK006946.2_mrna_4730	1521	2174.22	2390.45	0.136783	0.541313	*	0.324759	GO:0005737//cytoplasm	GO:0043878//glyceraldehyde-3-phosphate dehydrogenase (NAD+) (non-phosphorylating) activity;GO:0004029//aldehyde dehydrogenase (NAD) activity	GO:0006598//polyamine catabolic process;GO:0019483//beta-alanine biosynthetic process;GO:0015940//pantothenate biosynthetic process	K00129//aldehyde dehydrogenase (NAD(P)+) [EC:1.2.1.5]	NP_013892.1//aldehyde dehydrogenase (NAD(+)) ALD3 [Saccharomyces cerevisiae S288C]
BK006946.2_mrna_4772	2880	9807.82	7813.19	-0.328022	0.424899	*	0.220448	GO:0005739//mitochondrion;GO:0005741//mitochondrial outer membrane;GO:0005945//6-phosphofructokinase complex;GO:0005737//cytoplasm	GO:0003729//mRNA binding;GO:0003872//6-phosphofructokinase activity;GO:0005524//ATP binding;GO:0016208//AMP binding;GO:0046872//metal ion binding;GO:0048029//monosaccharide binding;GO:0070095//fructose-6-phosphate binding;GO:0046961//proton-transporting ATPase activity, rotational mechanism	GO:0061621//canonical glycolysis;GO:0006007//glucose catabolic process;GO:0006096//glycolytic process;GO:0070072//vacuolar proton-transporting V-type ATPase complex assembly;GO:0051453//regulation of intracellular pH;GO:0007035//vacuolar acidification;GO:1902600//proton transmembrane transport;GO:0006002//fructose 6-phosphate metabolic process;GO:0030388//fructose 1,6-bisphosphate metabolic proce…	K00850//6-phosphofructokinase 1 [EC:2.7.1.11]	NP_013932.1//6-phosphofructokinase subunit beta [Saccharomyces cerevisiae S288C]
BK006945.2_mrna_4151	2445	1587.07	1675.56	0.0782796	0.85641	*	0.724678	GO:0016020//membrane;GO:0005634//nucleus;GO:0048471//perinuclear region of cytoplasm	GO:0000981//DNA-binding transcription factor activity, RNA polymerase II-specific;GO:0000978//RNA polymerase II proximal promoter sequence-specific DNA binding;GO:0001228//DNA-binding transcription activator activity, RNA polymerase II-specific;GO:0008270//zinc ion binding;GO:0043565//sequence-specific DNA binding	GO:0035969//positive regulation of sterol import by positive regulation of transcription from RNA polymerase II promoter;GO:1904741//positive regulation of filamentous growth of a population of unicellular organisms in response to starvation by positive regulation of transcription from RNA polymerase II promoter;GO:0035961//positive regulation of ergosterol biosynthetic process by positive regula…	K11397//chromatin modification-related protein VID21;K19816//transcription activator MSS11	NP_013329.1//Ecm22p [Saccharomyces cerevisiae S288C]
BK006946.2_mrna_4843	684	3857.38	2494.36	-0.628952	0.0335629	*	0.00645528	GO:0005737//cytoplasm	GO:0004588//orotate phosphoribosyltransferase activity	GO:0044205//'de novo' UMP biosynthetic process;GO:0009116//nucleoside metabolic process;GO:0046132//pyrimidine ribonucleoside biosynthetic process;GO:0006221//pyrimidine nucleotide biosynthetic process;GO:0006207//'de novo' pyrimidine nucleobase biosynthetic process	K00762//orotate phosphoribosyltransferase [EC:2.4.2.10]	NP_013998.1//orotate phosphoribosyltransferase URA10 [Saccharomyces cerevisiae S288C]
BK006941.2_mrna_2045	8019	3524.7	3166.28	-0.154711	0.728942	*	0.535818	GO:0042788//polysomal ribosome;GO:0005829//cytosol;GO:0005739//mitochondrion;GO:0005844//polysome;GO:0022626//cytosolic ribosome	GO:0043022//ribosome binding;GO:0019887//protein kinase regulator activity;GO:0043008//ATP-dependent protein binding;GO:0031369//translation initiation factor binding;GO:0019901//protein kinase binding	GO:0060733//regulation of eIF2 alpha phosphorylation by amino acid starvation;GO:0034198//cellular response to amino acid starvation;GO:0006448//regulation of translational elongation;GO:0072755//cellular response to benomyl;GO:1990451//cellular stress response to acidic pH;GO:1904262//negative regulation of TORC1 signaling;GO:0016239//positive regulation of macroautophagy;GO:0071264//positive re…	K03235//elongation factor 3	NP_011320.3//Gcn1p [Saccharomyces cerevisiae S288C]
BK006934.2_mrna_2582	1818	1487.52	808.276	-0.87999	0.0236082	*	0.00410921	GO:0016021//integral component of membrane;GO:0005789//endoplasmic reticulum membrane	GO:0008565//protein transporter activity	GO:0006612//protein targeting to membrane;GO:0045047//protein targeting to ER;GO:0071555//cell wall organization;GO:0009408//response to heat	K01183//chitinase [EC:3.2.1.14]	NP_011835.1//Wsc4p [Saccharomyces cerevisiae S288C]
BK006946.2_mrna_4486	936	922.719	1026.98	0.154443	0.642613	*	0.431922	NA	NA	NA	K01869//leucyl-tRNA synthetase [EC:6.1.1.4];K08658//prenyl protein peptidase [EC:3.4.22.-]	NP_013662.1//Aim32p [Saccharomyces cerevisiae S288C]
BK006943.2_mrna_3356	3366	4809.37	4609.61	-0.0612035	0.862822	*	0.736756	GO:0005739//mitochondrion	NA	NA	NA	NP_012573.1//hypothetical protein YJR039W [Saccharomyces cerevisiae S288C]
BK006936.2_mrna_139	1950	2192.02	1705.7	-0.361899	0.199745	*	0.0724993	GO:0005829//cytosol	GO:0005524//ATP binding;GO:0051082//unfolded protein binding;GO:0016887//ATPase activity	GO:0006457//protein folding;GO:0006616//SRP-dependent cotranslational protein targeting to membrane, translocation;GO:0006515//protein quality control for misfolded or incompletely synthesized proteins	K03283//heat shock 70kDa protein 1/2/6/8	EHN03765.1//Ssa3p [Saccharomyces cerevisiae x Saccharomyces kudriavzevii VIN7]
BK006943.2_mrna_3434	852	4996.18	4651.45	-0.103144	0.783922	*	0.608639	GO:0005777//peroxisome;GO:0005739//mitochondrion	GO:0051920//peroxiredoxin activity	NA	K11592//endoribonuclease Dicer [EC:3.1.26.-]	NP_012645.1//Pxp2p [Saccharomyces cerevisiae S288C]
BK006949.2_mrna_6056	2691	1508.51	1537.99	0.0279288	0.957028	*	0.909763	GO:0033553//rDNA heterochromatin;GO:0005654//nucleoplasm;GO:0030686//90S preribosome;GO:0032040//small-subunit processome;GO:0005730//nucleolus;GO:0034455//t-UTP complex	GO:0034511//U3 snoRNA binding;GO:0003729//mRNA binding	GO:0031167//rRNA methylation;GO:0000462//maturation of SSU-rRNA from tricistronic rRNA transcript (SSU-rRNA, 5.8S rRNA, LSU-rRNA);GO:0045943//positive regulation of transcription by RNA polymerase I	K14552//NET1-associated nuclear protein 1 (U3 small nucleolar RNA-associated protein 17)	NP_015199.1//Nan1p [Saccharomyces cerevisiae S288C]
BK006948.2_mrna_5838	471	272.2	104.841	-1.37646	9.56194e-08	Down	4.73696e-09	GO:0005634//nucleus;GO:0005737//cytoplasm	GO:0061630//ubiquitin protein ligase activity;GO:0005524//ATP binding;GO:0016740//transferase activity;GO:0061631//ubiquitin conjugating enzyme activity;GO:0004842//ubiquitin-protein transferase activity	GO:1902426//deactivation of mitotic spindle assembly checkpoint;GO:0006511//ubiquitin-dependent protein catabolic process;GO:0006513//protein monoubiquitination;GO:0031145//anaphase-promoting complex-dependent catabolic process;GO:0000209//protein polyubiquitination	K06688//ubiquitin-conjugating enzyme E2 C [EC:2.3.2.23]	NP_014984.3//putative E2 ubiquitin-protein ligase UBC11 [Saccharomyces cerevisiae S288C]
BK006944.2_mrna_3647	621	19042.2	19344.3	0.0227082	0.950275	*	0.896837	GO:0005783//endoplasmic reticulum;GO:0005887//integral component of plasma membrane;GO:0016021//integral component of membrane;GO:0005789//endoplasmic reticulum membrane	GO:0043022//ribosome binding	GO:0006886//intracellular protein transport;GO:0006888//ER to Golgi vesicle-mediated transport;GO:0070973//protein localization to endoplasmic reticulum exit site	K20405//nitrogen permease regulator 2-like protein;K14009//B-cell receptor-associated protein 31	NP_012858.2//Yet1p [Saccharomyces cerevisiae S288C]
BK006937.2_mrna_615	852	58.5441	34.3263	-0.770208	0.0762089	*	0.01894	GO:0005774//vacuolar membrane;GO:0016021//integral component of membrane;GO:0005739//mitochondrion;GO:0005886//plasma membrane	GO:0008519//ammonium transmembrane transporter activity;GO:0015123//acetate transmembrane transporter activity	GO:0006847//plasma membrane acetate transport;GO:0055085//transmembrane transport;GO:0019740//nitrogen utilization;GO:0051321//meiotic cell cycle;GO:0015696//ammonium transport;GO:0006846//acetate transport	K07034//uncharacterized protein	NP_009936.1//Ady2p [Saccharomyces cerevisiae S288C]
BK006949.2_mrna_6175	1767	2053.32	2734.69	0.413419	0.152193	*	0.0487274	GO:0000127//transcription factor TFIIIC complex	GO:0003743//translation initiation factor activity;GO:0001002//RNA polymerase III type 1 promoter sequence-specific DNA binding;GO:0003677//DNA binding;GO:0001003//RNA polymerase III type 2 promoter sequence-specific DNA binding;GO:0001004//RNA polymerase III transcription regulator recruiting activity;GO:0008301//DNA binding, bending	GO:0042791//5S class rRNA transcription by RNA polymerase III;GO:0070898//RNA polymerase III preinitiation complex assembly;GO:0006383//transcription by RNA polymerase III	K15207//transcription factor C subunit 8	NP_015318.1//transcription factor TFIIIC subunit TFC8 [Saccharomyces cerevisiae S288C]
BK006938.2_mrna_1109	1605	2878.45	2802.67	-0.0384888	0.917875	*	0.82877	GO:0005737//cytoplasm	GO:0004305//ethanolamine kinase activity;GO:0005524//ATP binding;GO:0016301//kinase activity;GO:0016773//phosphotransferase activity, alcohol group as acceptor;GO:0004103//choline kinase activity	GO:0006646//phosphatidylethanolamine biosynthetic process;GO:0006656//phosphatidylcholine biosynthetic process	K00894//ethanolamine kinase [EC:2.7.1.82];K00866//choline kinase [EC:2.7.1.32]	NP_010431.3//bifunctional choline kinase/ethanolamine kinase EKI1 [Saccharomyces cerevisiae S288C]
BK006946.2_mrna_4459	4638	7283.2	6671.8	-0.126496	0.831951	*	0.685055	GO:0032541//cortical endoplasmic reticulum;GO:0016021//integral component of membrane;GO:0005739//mitochondrion;GO:0005933//cellular bud	GO:0008289//lipid binding;GO:0046872//metal ion binding;GO:0005544//calcium-dependent phospholipid binding	GO:0090158//endoplasmic reticulum membrane organization;GO:0060304//regulation of phosphatidylinositol dephosphorylation;GO:0061817//endoplasmic reticulum-plasma membrane tethering;GO:0006869//lipid transport	K01613//phosphatidylserine decarboxylase [EC:4.1.1.65]	NP_013639.1//Tcb3p [Saccharomyces cerevisiae S288C]
BK006948.2_mrna_5657	786	5067.37	4106.91	-0.303184	0.0933195	*	0.0249425	GO:0005634//nucleus;GO:0005829//cytosol;GO:0019774//proteasome core complex, beta-subunit complex;GO:0005789//endoplasmic reticulum membrane;GO:0005737//cytoplasm;GO:0034515//proteasome storage granule;GO:0005839//proteasome core complex	GO:0004175//endopeptidase activity;GO:0004298//threonine-type endopeptidase activity	GO:0051603//proteolysis involved in cellular protein catabolic process;GO:0043161//proteasome-mediated ubiquitin-dependent protein catabolic process;GO:0010499//proteasomal ubiquitin-independent protein catabolic process;GO:0010498//proteasomal protein catabolic process	K02739//20S proteasome subunit beta 2 [EC:3.4.25.1]	NP_014800.3//proteasome core particle subunit beta 2 [Saccharomyces cerevisiae S288C]
BK006939.2_mrna_1656	1227	327.313	423.742	0.372514	0.273451	*	0.115101	GO:0000794//condensed nuclear chromosome	NA	GO:0030435//sporulation resulting in formation of a cellular spore;GO:0042138//meiotic DNA double-strand break formation;GO:0006310//DNA recombination	NA	NP_010963.1//Mei4p [Saccharomyces cerevisiae S288C]
BK006948.2_mrna_5485	1656	2768.6	3176	0.198055	0.457316	*	0.248826	GO:0000836//Hrd1p ubiquitin ligase complex;GO:0005770//late endosome;GO:0000838//Hrd1p ubiquitin ligase ERAD-M complex;GO:0005794//Golgi apparatus;GO:0016021//integral component of membrane;GO:0000839//Hrd1p ubiquitin ligase ERAD-L complex;GO:0005789//endoplasmic reticulum membrane	GO:0061630//ubiquitin protein ligase activity;GO:0046872//metal ion binding;GO:0042802//identical protein binding;GO:0016874//ligase activity;GO:0004842//ubiquitin-protein transferase activity	GO:0070936//protein K48-linked ubiquitination;GO:0030970//retrograde protein transport, ER to cytosol;GO:0006511//ubiquitin-dependent protein catabolic process;GO:0030433//ubiquitin-dependent ERAD pathway;GO:0051865//protein autoubiquitination;GO:0031505//fungal-type cell wall organization;GO:0030968//endoplasmic reticulum unfolded protein response	K10601//E3 ubiquitin-protein ligase synoviolin [EC:2.3.2.27]	NP_014630.1//E3 ubiquitin-protein ligase HRD1 [Saccharomyces cerevisiae S288C]
BK006946.2_mrna_4791	2079	1116.91	1212.09	0.117983	0.683773	*	0.480301	GO:0005634//nucleus;GO:0005654//nucleoplasm;GO:0030870//Mre11 complex;GO:0005739//mitochondrion	GO:0003691//double-stranded telomeric DNA binding;GO:0032947//protein-containing complex scaffold activity;GO:0004520//endodeoxyribonuclease activity;GO:0042162//telomeric DNA binding;GO:0008408//3'-5' exonuclease activity;GO:0043047//single-stranded telomeric DNA binding;GO:0008296//3'-5'-exodeoxyribonuclease activity;GO:0051880//G-quadruplex DNA binding;GO:0004519//endonuclease activity;GO:0030…	GO:0007095//mitotic G2 DNA damage checkpoint;GO:0006284//base-excision repair;GO:0030437//ascospore formation;GO:0000706//meiotic DNA double-strand break processing;GO:0046940//nucleoside monophosphate phosphorylation;GO:0051037//regulation of transcription involved in meiotic cell cycle;GO:0006302//double-strand break repair;GO:0010791//DNA double-strand break processing involved in repair via s…	K10865//double-strand break repair protein MRE11	NP_013951.1//MRX complex nuclease subunit [Saccharomyces cerevisiae S288C]
BK006936.2_mrna_414	423	933.254	898.921	-0.0540766	0.862102	*	0.735016	GO:0071006//U2-type catalytic step 1 spliceosome;GO:0000974//Prp19 complex	NA	GO:0000398//mRNA splicing, via spliceosome	NA	NP_009747.3//Ntc20p [Saccharomyces cerevisiae S288C]
BK006934.2_mrna_2739	1758	859.61	958.525	0.157134	0.55385	*	0.337012	GO:0005829//cytosol	GO:0016279//protein-lysine N-methyltransferase activity;GO:0000277//[cytochrome c]-lysine N-methyltransferase activity	GO:0018026//peptidyl-lysine monomethylation;GO:0018023//peptidyl-lysine trimethylation;GO:0018022//peptidyl-lysine methylation	K18804//[cytochrome c]-lysine N-methyltransferase [EC:2.1.1.59]	NP_011977.1//cytochrome c lysine N-methyltransferase [Saccharomyces cerevisiae S288C]
BK006946.2_mrna_4445	1581	1926.82	1588.34	-0.278707	0.248486	*	0.0991448	GO:0016020//membrane;GO:0031307//integral component of mitochondrial outer membrane;GO:0005739//mitochondrion;GO:0005741//mitochondrial outer membrane	GO:0003885//D-arabinono-1,4-lactone oxidase activity;GO:0071949//FAD binding	GO:0070485//dehydro-D-arabinono-1,4-lactone biosynthetic process;GO:0034599//cellular response to oxidative stress	K00107//D-arabinono-1,4-lactone oxidase [EC:1.1.3.37]	NP_013624.1//D-arabinono-1,4-lactone oxidase [Saccharomyces cerevisiae S288C]
BK006934.2_mrna_2783	552	376.501	315.86	-0.253368	0.545986	*	0.32956	GO:0005654//nucleoplasm;GO:0030686//90S preribosome;GO:0032040//small-subunit processome;GO:0034457//Mpp10 complex;GO:0019013//viral nucleocapsid	GO:0030515//snoRNA binding;GO:0019843//rRNA binding	GO:0031167//rRNA methylation;GO:0042274//ribosomal small subunit biogenesis;GO:0006364//rRNA processing	K14560//U3 small nucleolar ribonucleoprotein protein IMP3	NP_012018.1//snoRNA-binding rRNA-processing protein IMP3 [Saccharomyces cerevisiae S288C]
BK006944.2_mrna_3752	888	811.079	975.25	0.26593	0.268513	*	0.111719	GO:0042729//DASH complex;GO:0005737//cytoplasm;GO:0005876//spindle microtubule	GO:0051010//microtubule plus-end binding	GO:0051987//positive regulation of attachment of spindle microtubules to kinetochore;GO:0051301//cell division;GO:0031116//positive regulation of microtubule polymerization;GO:0008608//attachment of spindle microtubules to kinetochore	K11573//DASH complex subunit SPC34	NP_012963.3//Spc34p [Saccharomyces cerevisiae S288C]
BK006940.2_mrna_1902	1317	0.167187	0.173923	0.0569864	0.832499	*	0.687431	GO:0000943//retrotransposon nucleocapsid;GO:0005737//cytoplasm	GO:0003723//RNA binding	GO:0032197//transposition, RNA-mediated	NA	NP_058157.1//gag protein [Saccharomyces cerevisiae S288C]
BK006943.2_mrna_3187	924	861.223	1026.46	0.253224	0.480155	*	0.268479	GO:0005739//mitochondrion	GO:0016810//hydrolase activity, acting on carbon-nitrogen (but not peptide) bonds	GO:0006807//nitrogen compound metabolic process	K11206//deaminated glutathione amidase [EC:3.5.1.128];K01431//beta-ureidopropionase [EC:3.5.1.6]	NP_012409.1//putative hydrolase [Saccharomyces cerevisiae S288C]
BK006948.2_mrna_5890	1875	841.337	700.614	-0.264065	0.344474	*	0.161312	GO:0005576//extracellular region	NA	NA	NA	NP_015034.3//hypothetical protein YOR389W [Saccharomyces cerevisiae S288C]
BK006941.2_mrna_2218	2124	12866.5	10525.8	-0.289685	0.561324	*	0.344755	GO:0005634//nucleus;GO:0005737//cytoplasm	GO:0004834//tryptophan synthase activity	GO:0000162//tryptophan biosynthetic process	K01694//tryptophan synthase [EC:4.2.1.20]	NP_011489.1//tryptophan synthase TRP5 [Saccharomyces cerevisiae S288C]
BK006949.2_mrna_6364	1314	5857.02	4673.45	-0.32568	0.0474722	*	0.0102889	GO:0016020//membrane;GO:0005768//endosome;GO:0005634//nucleus;GO:1990621//ESCRT IV complex;GO:0005783//endoplasmic reticulum;GO:0005737//cytoplasm	GO:0005524//ATP binding;GO:0042802//identical protein binding;GO:0042803//protein homodimerization activity;GO:0016887//ATPase activity	GO:0032511//late endosome to vacuole transport via multivesicular body sorting pathway;GO:0070676//intralumenal vesicle formation;GO:0043328//protein transport to vacuole involved in ubiquitin-dependent protein catabolic process via the multivesicular body sorting pathway;GO:0051260//protein homooligomerization;GO:0045324//late endosome to vacuole transport;GO:0045053//protein retention in Golgi …	K12196//vacuolar protein-sorting-associated protein 4	NP_015499.1//AAA family ATPase VPS4 [Saccharomyces cerevisiae S288C]
BK006935.2_mrna_11	1254	5805.4	3228.9	-0.846351	7.78527e-06	*	5.15978e-07	GO:0005634//nucleus;GO:0005737//cytoplasm	GO:0016616//oxidoreductase activity, acting on the CH-OH group of donors, NAD or NADP as acceptor;GO:0052587//diacetyl reductase ((R)-acetoin forming) activity;GO:0008270//zinc ion binding;GO:0016491//oxidoreductase activity	NA	K00004//(R,R)-butanediol dehydrogenase / meso-butanediol dehydrogenase / diacetyl reductase [EC:1.1.1.4 1.1.1.- 1.1.1.303]	NP_009340.1//putative dehydrogenase BDH2 [Saccharomyces cerevisiae S288C]
BK006937.2_mrna_709	468	363.344	422.588	0.217916	0.595977	*	0.382911	GO:0005794//Golgi apparatus;GO:0016021//integral component of membrane	NA	NA	NA	NP_010023.1//hypothetical protein YCR099C [Saccharomyces cerevisiae S288C]
BK006936.2_mrna_112	648	5760.68	5025.5	-0.196972	0.385251	*	0.190272	GO:0000138//Golgi trans cisterna;GO:0005829//cytosol;GO:0016021//integral component of membrane;GO:0000139//Golgi membrane	NA	GO:0042147//retrograde transport, endosome to Golgi;GO:0015031//protein transport;GO:0016192//vesicle-mediated transport	NA	NP_009448.1//Sft2p [Saccharomyces cerevisiae S288C]
BK006934.2_mrna_2756	306	104.712	47.4076	-1.14324	0.00843199	Down	0.00114873	NA	NA	NA	NA	NP_001335740.1//hypothetical protein YHR125W [Saccharomyces cerevisiae S288C]
BK006943.2_mrna_3451	360	27.7761	20.5941	-0.431615	0.513064	*	0.299708	GO:0005634//nucleus;GO:0000790//nuclear chromatin;GO:0005737//cytoplasm	GO:0000981//DNA-binding transcription factor activity, RNA polymerase II-specific;GO:0008270//zinc ion binding;GO:0043565//sequence-specific DNA binding;GO:0003700//DNA-binding transcription factor activity	GO:0000122//negative regulation of transcription by RNA polymerase II;GO:0006355//regulation of transcription, DNA-templated;GO:0045944//positive regulation of transcription by RNA polymerase II;GO:0006351//transcription, DNA-templated	NA	NP_001335788.1//hypothetical protein YJR128W [Saccharomyces cerevisiae S288C]
BK006948.2_mrna_5549	1335	1768.25	2423.74	0.454913	0.0304064	*	0.00567417	GO:0005634//nucleus;GO:0005886//plasma membrane	GO:0030295//protein kinase activator activity	GO:0006006//glucose metabolic process;GO:0006357//regulation of transcription by RNA polymerase II;GO:0007165//signal transduction;GO:0009651//response to salt stress;GO:0071592//nicotinic acid riboside biosynthetic process;GO:0071590//nicotinamide riboside biosynthetic process	NA	NP_014690.1//Std1p [Saccharomyces cerevisiae S288C]
BK006948.2_mrna_5512	207	1.22275	1.05876	-0.207751	0.764712	*	0.583101	NA	NA	NA	NA	NP_878167.1//hypothetical protein YOR011W-A [Saccharomyces cerevisiae S288C]
BK006946.2_mrna_4663	348	3716.92	607.84	-2.61234	1.27819e-06	Down	7.53011e-08	NA	NA	NA	NA	NP_013825.1//Spg4p [Saccharomyces cerevisiae S288C]
BK006949.2_mrna_6208	2244	5627.7	5782.24	0.0390827	0.903285	*	0.802104	GO:0016020//membrane;GO:0031942//i-AAA complex;GO:0005743//mitochondrial inner membrane;GO:0005739//mitochondrion	GO:0046872//metal ion binding;GO:0004222//metalloendopeptidase activity;GO:0005524//ATP binding;GO:0004176//ATP-dependent peptidase activity	GO:0006457//protein folding;GO:0006508//proteolysis;GO:0051604//protein maturation;GO:0006515//protein quality control for misfolded or incompletely synthesized proteins;GO:0045041//protein import into mitochondrial intermembrane space;GO:0030150//protein import into mitochondrial matrix;GO:0007005//mitochondrion organization	K08955//ATP-dependent metalloprotease [EC:3.4.24.-]	NP_015349.1//i-AAA protease YME1 [Saccharomyces cerevisiae S288C]
BK006938.2_mrna_987	963	2374	3439.79	0.535003	0.239979	*	0.0941551	GO:0005783//endoplasmic reticulum;GO:0016021//integral component of membrane;GO:0005739//mitochondrion;GO:0005886//plasma membrane;GO:0005933//cellular bud	GO:0005216//ion channel activity	NA	NA	NP_010316.1//Mrh1p [Saccharomyces cerevisiae S288C]
BK006949.2_mrna_6095	1029	2274.18	2341.09	0.0418361	0.916436	*	0.825464	NA	GO:0018456//aryl-alcohol dehydrogenase (NAD+) activity	GO:0006081//cellular aldehyde metabolic process	K15303//aflatoxin B1 aldehyde reductase;K17647//versiconal hemiacetal acetate reductase [EC:1.1.1.353]	NP_015237.1//aldo-keto reductase superfamily protein [Saccharomyces cerevisiae S288C]
BK006943.2_mrna_3393	978	435.755	494.041	0.181115	0.725077	*	0.529458	GO:0005634//nucleus;GO:0005737//cytoplasm	GO:0046872//metal ion binding;GO:0019135//deoxyhypusine monooxygenase activity	GO:0000226//microtubule cytoskeleton organization;GO:0008612//peptidyl-lysine modification to peptidyl-hypusine	K06072//deoxyhypusine monooxygenase [EC:1.14.99.29]	NP_012604.1//Lia1p [Saccharomyces cerevisiae S288C]
BK006936.2_mrna_164	417	1828.38	539.287	-1.76144	4.73841e-15	Down	1.42747e-16	NA	GO:0046872//metal ion binding	NA	K15428//Cys-Gly metallodipeptidase DUG1 [EC:3.4.13.-]	NP_009504.1//Moh1p [Saccharomyces cerevisiae S288C]
BK006947.3_mrna_4952	5269	15710.7	15937.8	0.0207104	0.970729	*	0.938255	GO:0000943//retrotransposon nucleocapsid;GO:0005634//nucleus;GO:0005737//cytoplasm	GO:0003723//RNA binding;GO:0003677//DNA binding;GO:0008233//peptidase activity;GO:0005524//ATP binding;GO:0004523//RNA-DNA hybrid ribonuclease activity;GO:0004190//aspartic-type endopeptidase activity;GO:0003964//RNA-directed DNA polymerase activity;GO:0003887//DNA-directed DNA polymerase activity;GO:0046872//metal ion binding;GO:0004540//ribonuclease activity	GO:0015074//DNA integration;GO:0032197//transposition, RNA-mediated;GO:0006310//DNA recombination	K14835//25S rRNA (cytosine2870-C5)-methyltransferase [EC:2.1.1.310]	NP_058178.1//gag-pol fusion protein [Saccharomyces cerevisiae S288C]
BK006945.2_mrna_4393	609	29.6597	31.0889	0.0678914	0.933917	*	0.861548	NA	GO:0005524//ATP binding;GO:0004386//helicase activity	NA	NA	NP_013567.3//hypothetical protein YLR462W [Saccharomyces cerevisiae S288C]
BK006936.2_mrna_453	1632	4393.15	4352.23	-0.0134997	0.969514	*	0.93531	GO:0005782//peroxisomal matrix;GO:0016021//integral component of membrane;GO:0005737//cytoplasm;GO:0005778//peroxisomal membrane	GO:0050203//oxalate-CoA ligase activity;GO:0003729//mRNA binding;GO:0003824//catalytic activity	GO:0033611//oxalate catabolic process	K22133//oxalate---CoA ligase [EC:6.2.1.8]	NP_009781.3//Pcs60p [Saccharomyces cerevisiae S288C]
BK006935.2_mrna_18	2352	8931.92	9611.86	0.105846	0.836714	*	0.695944	GO:0005783//endoplasmic reticulum;GO:0016021//integral component of membrane;GO:0005789//endoplasmic reticulum membrane;GO:0005737//cytoplasm	GO:0015230//FAD transmembrane transporter activity	GO:0006457//protein folding;GO:0055085//transmembrane transport;GO:0015883//FAD transport;GO:0071476//cellular hypotonic response;GO:0030148//sphingolipid biosynthetic process;GO:0055074//calcium ion homeostasis;GO:0009272//fungal-type cell wall biogenesis	NA	NP_009348.2//flavin adenine dinucleotide transporter FLC2 [Saccharomyces cerevisiae S288C]
BK006947.3_mrna_4966	1053	5467.82	4430.47	-0.303507	0.334499	*	0.154458	GO:0005634//nucleus;GO:0005829//cytosol;GO:0005739//mitochondrion;GO:0005737//cytoplasm	GO:0016616//oxidoreductase activity, acting on the CH-OH group of donors, NAD or NADP as acceptor;GO:0047964//glyoxylate reductase activity;GO:0051287//NAD binding;GO:0042803//protein homodimerization activity;GO:0016618//hydroxypyruvate reductase activity;GO:0030267//glyoxylate reductase (NADP) activity	GO:0009436//glyoxylate catabolic process	K00015//glyoxylate reductase [EC:1.1.1.26]	NP_014125.1//glyoxylate reductase [Saccharomyces cerevisiae S288C]
BK006938.2_mrna_919	987	78.476	75.0731	-0.0639545	0.935269	*	0.864029	NA	NA	NA	K19851//flocculation protein FLO11	GAX67419.1//pheromone-regulated protein [Saccharomyces cerevisiae]
BK006941.2_mrna_2283	384	1292.95	7975.65	2.62493	5.74364e-34	Up	3.07609e-36	GO:0015934//large ribosomal subunit;GO:0022625//cytosolic large ribosomal subunit	GO:0003723//RNA binding;GO:0003735//structural constituent of ribosome	GO:0006412//translation;GO:0002181//cytoplasmic translation;GO:0042273//ribosomal large subunit biogenesis	K02898//large subunit ribosomal protein L26e	NP_011548.2//ribosomal 60S subunit protein L26B [Saccharomyces cerevisiae S288C]
BK006938.2_mrna_929	1407	1538.03	829.638	-0.890527	3.58957e-05	*	2.63736e-06	GO:0009277//fungal-type cell wall;GO:0071944//cell periphery	GO:0003993//acid phosphatase activity;GO:0016791//phosphatase activity	GO:0007124//pseudohyphal growth;GO:0001403//invasive growth in response to glucose limitation	K01078//acid phosphatase [EC:3.1.3.2]	NP_010260.1//putative acid phosphatase DIA3 [Saccharomyces cerevisiae S288C]
BK006945.2_mrna_3854	2514	432.39	484.496	0.164152	0.697925	*	0.497834	GO:0005634//nucleus;GO:0005730//nucleolus;GO:0030687//preribosome, large subunit precursor	GO:0005524//ATP binding;GO:1990275//preribosome binding;GO:0016887//ATPase activity	GO:0000055//ribosomal large subunit export from nucleus;GO:0042254//ribosome biogenesis;GO:0051973//positive regulation of telomerase activity;GO:0042273//ribosomal large subunit biogenesis	K14571//ribosome biogenesis ATPase	NP_013066.1//putative AAA family ATPase RIX7 [Saccharomyces cerevisiae S288C]
BK006946.2_mrna_4800	2034	9004.97	5245.41	-0.779664	0.0806594	*	0.0205192	GO:0005634//nucleus;GO:0043332//mating projection tip;GO:0005739//mitochondrion;GO:0005737//cytoplasm	GO:0005089//Rho guanyl-nucleotide exchange factor activity	GO:0000747//conjugation with cellular fusion;GO:0000742//karyogamy involved in conjugation with cellular fusion;GO:0035023//regulation of Rho protein signal transduction;GO:0031385//regulation of termination of mating projection growth;GO:0000755//cytogamy	NA	NP_013959.1//Fus2p [Saccharomyces cerevisiae S288C]
BK006936.2_mrna_518	1452	1962.37	2374.77	0.275189	0.292648	*	0.126855	GO:0005794//Golgi apparatus;GO:0030131//clathrin adaptor complex;GO:0030123//AP-3 adaptor complex;GO:0030659//cytoplasmic vesicle membrane	NA	GO:0006886//intracellular protein transport;GO:0006896//Golgi to vacuole transport;GO:0006623//protein targeting to vacuole;GO:0016192//vesicle-mediated transport	K12398//AP-3 complex subunit mu	NP_009847.4//Apm3p [Saccharomyces cerevisiae S288C]
BK006938.2_mrna_915	801	763.842	960.901	0.331115	0.278495	*	0.118374	GO:0071004//U2-type prespliceosome;GO:0005686//U2 snRNP;GO:0071013//catalytic step 2 spliceosome	GO:0003723//RNA binding;GO:0008270//zinc ion binding;GO:0003676//nucleic acid binding	GO:0000245//spliceosomal complex assembly	K12826//splicing factor 3A subunit 2	NP_010241.1//Prp11p [Saccharomyces cerevisiae S288C]
BK006940.2_mrna_1958	3009	2059.49	2190.89	0.0892312	0.823358	*	0.66649	GO:0005737//cytoplasm	NA	GO:0000082//G1/S transition of mitotic cell cycle	K15457//SIT4-associating protein SAP155	NP_116698.3//Sap155p [Saccharomyces cerevisiae S288C]
BK006938.2_mrna_914	1323	1054.13	1173.2	0.154405	0.531961	*	0.315744	GO:0005759//mitochondrial matrix;GO:0005739//mitochondrion	GO:0003723//RNA binding	GO:0006397//mRNA processing;GO:0032543//mitochondrial translation	NA	NP_010240.1//Mtf2p [Saccharomyces cerevisiae S288C]
BK006946.2_mrna_4423	1005	1523.46	2220.58	0.543591	0.0071616	*	0.000940897	GO:0005634//nucleus;GO:0031965//nuclear membrane	GO:0043022//ribosome binding;GO:0008270//zinc ion binding	GO:0051237//maintenance of RNA location;GO:0051028//mRNA transport	NA	NP_013600.2//Pml39p [Saccharomyces cerevisiae S288C]
BK006944.2_mrna_3764	402	1781.92	1309.43	-0.44449	0.156394	*	0.0505956	GO:0005739//mitochondrion	GO:0016491//oxidoreductase activity	NA	NA	NP_012975.3//putative redox protein [Saccharomyces cerevisiae S288C]
BK006949.2_mrna_6072	1002	2656.04	358.667	-2.88856	3.99719e-63	Down	9.36581e-66	GO:0005634//nucleus;GO:0005829//cytosol;GO:0043332//mating projection tip;GO:0005737//cytoplasm	GO:0046872//metal ion binding;GO:0008270//zinc ion binding;GO:0004053//arginase activity;GO:0090369//ornithine carbamoyltransferase inhibitor activity;GO:0030145//manganese ion binding	GO:0006525//arginine metabolic process;GO:0090368//regulation of ornithine metabolic process;GO:0019547//arginine catabolic process to ornithine;GO:0000050//urea cycle	K01476//arginase [EC:3.5.3.1]	NP_015214.1//arginase [Saccharomyces cerevisiae S288C]
BK006946.2_mrna_4513	411	3060.12	12788	2.06313	4.39975e-19	Up	1.06772e-20	GO:0005840//ribosome;GO:0022627//cytosolic small ribosomal subunit	GO:0003735//structural constituent of ribosome	GO:0000028//ribosomal small subunit assembly;GO:0006412//translation;GO:0002181//cytoplasmic translation	K02962//small subunit ribosomal protein S17e	NP_013688.1//ribosomal 40S subunit protein S17A [Saccharomyces cerevisiae S288C]
BK006941.2_mrna_2301	1086	2318.76	2114.07	-0.133328	0.641309	*	0.430187	GO:0034098//VCP-NPL4-UFD1 AAA ATPase complex;GO:1990112//RQC complex;GO:0005634//nucleus;GO:0005829//cytosol;GO:0000839//Hrd1p ubiquitin ligase ERAD-L complex;GO:0000837//Doa10p ubiquitin ligase complex	GO:0043130//ubiquitin binding;GO:0031593//polyubiquitin modification-dependent protein binding;GO:0032183//SUMO binding	GO:0035103//sterol regulatory element binding protein cleavage;GO:0072665//protein localization to vacuole;GO:0030970//retrograde protein transport, ER to cytosol;GO:1900182//positive regulation of protein localization to nucleus;GO:0034067//protein localization to Golgi apparatus;GO:1990116//ribosome-associated ubiquitin-dependent protein catabolic process;GO:0071712//ER-associated misfolded pro…	K14016//ubiquitin fusion degradation protein 1	NP_011562.1//polyubiquitin-binding protein UFD1 [Saccharomyces cerevisiae S288C]
BK006937.2_mrna_575	1323	2076.18	1792.25	-0.212159	0.459024	*	0.249985	GO:0005938//cell cortex;GO:0005816//spindle pole body;GO:0035371//microtubule plus-end;GO:0043332//mating projection tip;GO:0000778//condensed nuclear chromosome kinetochore;GO:0005819//spindle;GO:0000776//kinetochore;GO:0005876//spindle microtubule	GO:0042803//protein homodimerization activity;GO:0008017//microtubule binding	GO:0000022//mitotic spindle elongation;GO:0051301//cell division;GO:0030543//2-micrometer plasmid partitioning;GO:0000742//karyogamy involved in conjugation with cellular fusion;GO:0000743//nuclear migration involved in conjugation with cellular fusion;GO:0031115//negative regulation of microtubule polymerization	K06687//nucleolar protein involved in exit from mitosis;K04648//dynactin 1;K18715//nucleoporin NUP159;K11836//ubiquitin carboxyl-terminal hydrolase 5/13 [EC:3.4.19.12]	NP_009901.1//Bik1p [Saccharomyces cerevisiae S288C]
BK006936.2_mrna_338	1350	5540.31	6453.73	0.220168	0.383633	*	0.188638	GO:0005783//endoplasmic reticulum;GO:0016021//integral component of membrane;GO:0005789//endoplasmic reticulum membrane	GO:0019187//beta-1,4-mannosyltransferase activity;GO:0004578//chitobiosyldiphosphodolichol beta-mannosyltransferase activity;GO:0000030//mannosyltransferase activity	GO:0006490//oligosaccharide-lipid intermediate biosynthetic process;GO:0006486//protein glycosylation;GO:0006487//protein N-linked glycosylation	K03842//beta-1,4-mannosyltransferase [EC:2.4.1.142]	NP_009668.3//chitobiosyldiphosphodolichol beta-1,4 mannosyltransferase [Saccharomyces cerevisiae S288C]
BK006938.2_mrna_781	1287	3196.87	4503.99	0.494543	0.271859	*	0.114193	GO:0005634//nucleus;GO:0005739//mitochondrion	GO:0004410//homocitrate synthase activity	GO:0001207//histone displacement;GO:0006281//DNA repair;GO:0019878//lysine biosynthetic process via aminoadipic acid	K01655//homocitrate synthase [EC:2.3.3.14]	NP_010099.1//homocitrate synthase LYS20 [Saccharomyces cerevisiae S288C]
BK006945.2_mrna_4372	2130	1809.73	2777.52	0.618019	0.000418346	*	3.67584e-05	GO:0005783//endoplasmic reticulum;GO:0005635//nuclear envelope;GO:0070939//Dsl1/NZR complex;GO:0005789//endoplasmic reticulum membrane	NA	GO:0032581//ER-dependent peroxisome organization;GO:0006890//retrograde vesicle-mediated transport, Golgi to ER;GO:0015031//protein transport;GO:0016192//vesicle-mediated transport	K20475//protein transport protein SEC39	NP_013545.3//Sec39p [Saccharomyces cerevisiae S288C]
BK006946.2_mrna_4402	1542	7784.77	7732.65	-0.00969272	0.981575	*	0.962462	GO:0005783//endoplasmic reticulum;GO:0005739//mitochondrion;GO:0005886//plasma membrane	NA	GO:0007131//reciprocal meiotic recombination	K12860//pre-mRNA-splicing factor CDC5/CEF1	NP_013578.1//Msc1p [Saccharomyces cerevisiae S288C]
BK006941.2_mrna_2149	3954	1905.46	1826.24	-0.0612573	0.914442	*	0.821641	GO:0005643//nuclear pore;GO:0031965//nuclear membrane;GO:0000781//chromosome, telomeric region;GO:0031080//nuclear pore outer ring;GO:0016021//integral component of membrane;GO:0044613//nuclear pore central transport channel;GO:0044614//nuclear pore cytoplasmic filaments	GO:0003723//RNA binding;GO:0016787//hydrolase activity;GO:0017056//structural constituent of nuclear pore;GO:0008139//nuclear localization sequence binding	GO:0031081//nuclear pore distribution;GO:0035392//maintenance of chromatin silencing at telomere;GO:0034398//telomere tethering at nuclear periphery;GO:0006607//NLS-bearing protein import into nucleus;GO:0006409//tRNA export from nucleus;GO:0046822//regulation of nucleocytoplasmic transport;GO:0006405//RNA export from nucleus;GO:0045893//positive regulation of transcription, DNA-templated;GO:0036…	K18720//nucleoporin NUP145	NP_011423.1//nucleocytoplasmic transporter NUP145 [Saccharomyces cerevisiae S288C]
BK006938.2_mrna_1010	747	28221	36527.1	0.372199	0.159056	*	0.0519874	GO:0005829//cytosol;GO:0005739//mitochondrion;GO:0005886//plasma membrane;GO:0005737//cytoplasm	GO:0004807//triose-phosphate isomerase activity	GO:0019563//glycerol catabolic process;GO:0006094//gluconeogenesis;GO:0006096//glycolytic process;GO:0046166//glyceraldehyde-3-phosphate biosynthetic process	K01803//triosephosphate isomerase (TIM) [EC:5.3.1.1]	NP_010335.1//triose-phosphate isomerase TPI1 [Saccharomyces cerevisiae S288C]
BK006936.2_mrna_331	1608	3248.84	2826.79	-0.200762	0.324336	*	0.147358	GO:0005634//nucleus;GO:0034967//Set3 complex;GO:0070210//Rpd3L-Expanded complex;GO:0000118//histone deacetylase complex	GO:0003714//transcription corepressor activity	GO:0006357//regulation of transcription by RNA polymerase II;GO:0045835//negative regulation of meiotic nuclear division;GO:0006355//regulation of transcription, DNA-templated;GO:0031939//negative regulation of chromatin silencing at telomere;GO:0032874//positive regulation of stress-activated MAPK cascade;GO:0016575//histone deacetylation	K04508//transducin (beta)-like 1	NP_009661.1//Sif2p [Saccharomyces cerevisiae S288C]
BK006938.2_mrna_879	1830	2236.38	2471.4	0.144165	0.464818	*	0.255432	GO:0005634//nucleus;GO:0005829//cytosol	GO:0004737//pyruvate decarboxylase activity;GO:0000287//magnesium ion binding;GO:0016831//carboxy-lyase activity;GO:0030976//thiamine pyrophosphate binding;GO:0001102//RNA polymerase II activating transcription factor binding;GO:0047433//branched-chain-2-oxoacid decarboxylase activity	GO:0006067//ethanol metabolic process;GO:0009083//branched-chain amino acid catabolic process;GO:0006090//pyruvate metabolic process;GO:0045944//positive regulation of transcription by RNA polymerase II;GO:0000949//aromatic amino acid family catabolic process to alcohol via Ehrlich pathway;GO:0006569//tryptophan catabolic process;GO:0090180//positive regulation of thiamine biosynthetic process;GO…	K01568//pyruvate decarboxylase [EC:4.1.1.1]	NP_010203.1//branched-chain-2-oxoacid decarboxylase THI3 [Saccharomyces cerevisiae S288C]
BK006946.2_mrna_4585	1665	2182.78	1437.78	-0.602327	0.000692335	*	6.48883e-05	GO:0005634//nucleus;GO:0005737//cytoplasm	GO:0004725//protein tyrosine phosphatase activity	GO:1902751//positive regulation of cell cycle G2/M phase transition;GO:0051301//cell division;GO:0045931//positive regulation of mitotic cell cycle;GO:0110032//positive regulation of G2/MI transition of meiotic cell cycle;GO:0010971//positive regulation of G2/M transition of mitotic cell cycle;GO:0000086//G2/M transition of mitotic cell cycle;GO:0000079//regulation of cyclin-dependent protein ser…	K02555//M-phase inducer tyrosine phosphatase [EC:3.1.3.48]	NP_013750.1//putative tyrosine protein phosphatase MIH1 [Saccharomyces cerevisiae S288C]
BK006938.2_mrna_965	4506	4175.38	3841.55	-0.120218	0.730136	*	0.537643	GO:0016021//integral component of membrane;GO:0005886//plasma membrane	GO:0005524//ATP binding;GO:0042626//ATPase activity, coupled to transmembrane movement of substances	GO:0046618//drug export;GO:0030003//cellular cation homeostasis	K08712//ATP-binding cassette, subfamily G (WHITE), member 2, SNQ2	CAY78519.1//Snq2p [Saccharomyces cerevisiae EC1118]
BK006942.2_mrna_2923	1224	1798.95	1005.06	-0.839877	0.000872763	*	8.42819e-05	GO:0005634//nucleus	GO:0003677//DNA binding;GO:0030695//GTPase regulator activity	GO:0045944//positive regulation of transcription by RNA polymerase II;GO:0007265//Ras protein signal transduction;GO:0009272//fungal-type cell wall biogenesis	K03126//transcription initiation factor TFIID subunit 12;K21671//glycolytic genes transcriptional activator GCR2	NP_012147.3//Rpi1p [Saccharomyces cerevisiae S288C]
BK006941.2_mrna_2176	1512	2036.08	1946.76	-0.0647166	0.796602	*	0.627604	GO:0005783//endoplasmic reticulum;GO:0016021//integral component of membrane;GO:0005789//endoplasmic reticulum membrane	GO:0000009//alpha-1,6-mannosyltransferase activity;GO:0033164//glycolipid 6-alpha-mannosyltransferase activity;GO:0004378//GDP-Man:Man1GlcNAc2-PP-Dol alpha-1,3-mannosyltransferase activity;GO:0000033//alpha-1,3-mannosyltransferase activity;GO:0102704//GDP-Man:Man2GlcNAc2-PP-dolichol alpha-1,6-mannosyltransferase activity	GO:0006490//oligosaccharide-lipid intermediate biosynthetic process;GO:0006486//protein glycosylation;GO:0033577//protein glycosylation in endoplasmic reticulum	K03843//alpha-1,3/alpha-1,6-mannosyltransferase [EC:2.4.1.132 2.4.1.257]	NP_011450.1//GDP-Man:Man(1)GlcNAc(2)-PP-dolichol alpha-1,3-mannosyltransferase [Saccharomyces cerevisiae S288C]
BK006943.2_mrna_3391	1062	2126.72	2476.59	0.219728	0.328691	*	0.15007	GO:0005634//nucleus;GO:0005663//DNA replication factor C complex;GO:0031390//Ctf18 RFC-like complex;GO:0031391//Elg1 RFC-like complex;GO:0031389//Rad17 RFC-like complex	GO:0003677//DNA binding;GO:0003689//DNA clamp loader activity;GO:0005524//ATP binding;GO:0017076//purine nucleotide binding	GO:0006272//leading strand elongation;GO:0006260//DNA replication;GO:0007062//sister chromatid cohesion;GO:0006298//mismatch repair;GO:0006261//DNA-dependent DNA replication;GO:0000076//DNA replication checkpoint	K10755//replication factor C subunit 2/4	NP_012602.3//replication factor C subunit 2 [Saccharomyces cerevisiae S288C]
BK006942.2_mrna_2866	363	3.16704	3.3937	0.099726	0.921295	*	0.838276	GO:0009277//fungal-type cell wall;GO:0000324//fungal-type vacuole	GO:0005199//structural constituent of cell wall	GO:0030437//ascospore formation;GO:0045944//positive regulation of transcription by RNA polymerase II;GO:0031505//fungal-type cell wall organization	NA	NP_012093.1//seripauperin PAU14 [Saccharomyces cerevisiae S288C]
BK006938.2_mrna_1105	1833	1937.58	1710.38	-0.179938	0.452413	*	0.244265	GO:0005634//nucleus;GO:0005737//cytoplasm	GO:0061630//ubiquitin protein ligase activity;GO:0046872//metal ion binding;GO:0004842//ubiquitin-protein transferase activity	GO:0006511//ubiquitin-dependent protein catabolic process;GO:0071630//nuclear protein quality control by the ubiquitin-proteasome system;GO:0051788//response to misfolded protein	K14297//nuclear pore complex protein Nup98-Nup96;K10601//E3 ubiquitin-protein ligase synoviolin [EC:2.3.2.27];K00921//1-phosphatidylinositol-3-phosphate 5-kinase [EC:2.7.1.150]	NP_010427.3//ubiquitin-protein ligase SAN1 [Saccharomyces cerevisiae S288C]
BK006949.2_mrna_6083	549	1697.88	1658.39	-0.0339519	0.921295	*	0.836786	GO:1990524//INA complex;GO:0005743//mitochondrial inner membrane;GO:0031304//intrinsic component of mitochondrial inner membrane;GO:0016021//integral component of membrane;GO:0005739//mitochondrion	NA	GO:0033615//mitochondrial proton-transporting ATP synthase complex assembly	NA	NP_015226.1//Ina17p [Saccharomyces cerevisiae S288C]
BK006946.2_mrna_4440	753	3813.39	3551.87	-0.102497	0.796602	*	0.627747	GO:0019773//proteasome core complex, alpha-subunit complex;GO:0005634//nucleus;GO:0042175//nuclear outer membrane-endoplasmic reticulum membrane network;GO:0005737//cytoplasm;GO:0034515//proteasome storage granule;GO:0005839//proteasome core complex	GO:0004175//endopeptidase activity;GO:0004298//threonine-type endopeptidase activity	GO:0006511//ubiquitin-dependent protein catabolic process;GO:0043161//proteasome-mediated ubiquitin-dependent protein catabolic process;GO:0010499//proteasomal ubiquitin-independent protein catabolic process;GO:0010498//proteasomal protein catabolic process	K02726//20S proteasome subunit alpha 2 [EC:3.4.25.1]	NP_013618.1//proteasome core particle subunit alpha 2 [Saccharomyces cerevisiae S288C]
BK006935.2_mrna_89	705	295.966	572.322	0.951396	0.000126309	*	1.01259e-05	GO:0000329//fungal-type vacuole membrane;GO:0005783//endoplasmic reticulum;GO:0005794//Golgi apparatus;GO:0016021//integral component of membrane;GO:0005886//plasma membrane	NA	GO:0016050//vesicle organization	NA	NP_009415.1//DUP240 family protein [Saccharomyces cerevisiae S288C]
BK006949.2_mrna_6138	300	414.384	366.033	-0.178996	0.561324	*	0.34478	GO:0000113//nucleotide-excision repair factor 4 complex;GO:0070449//elongin complex;GO:0005737//cytoplasm;GO:0031463//Cul3-RING ubiquitin ligase complex	GO:0003746//translation elongation factor activity;GO:0004842//ubiquitin-protein transferase activity	GO:0006511//ubiquitin-dependent protein catabolic process;GO:0032968//positive regulation of transcription elongation from RNA polymerase II promoter;GO:0016567//protein ubiquitination;GO:0070911//global genome nucleotide-excision repair	K03872//elongin-C	NP_015279.1//elongin C [Saccharomyces cerevisiae S288C]
BK006945.2_mrna_3933	675	15558.5	11393.1	-0.449538	0.277661	*	0.117753	GO:0009277//fungal-type cell wall;GO:0005576//extracellular region;GO:0071944//cell periphery;GO:0031225//anchored component of membrane	NA	GO:0000749//response to pheromone triggering conjugation with cellular fusion	NA	NP_013141.1//Afb1p [Saccharomyces cerevisiae S288C]
BK006946.2_mrna_4452	606	2669.68	2311.36	-0.207923	0.456301	*	0.247568	GO:0005634//nucleus;GO:0005737//cytoplasm	NA	NA	K09705//uncharacterized protein	NP_013632.1//hypothetical protein YML079W [Saccharomyces cerevisiae S288C]
BK006945.2_mrna_4092	2616	3170.25	4320.45	0.446585	0.0769533	*	0.01919	GO:0000145//exocyst;GO:0043332//mating projection tip;GO:0005935//cellular bud neck	NA	GO:0048278//vesicle docking;GO:0015031//protein transport;GO:0090522//vesicle tethering involved in exocytosis;GO:0006893//Golgi to plasma membrane transport;GO:0006887//exocytosis	K19984//exocyst complex component 5	NP_013267.1//exocyst subunit SEC10 [Saccharomyces cerevisiae S288C]
BK006944.2_mrna_3627	1239	2719.24	3199.61	0.234692	0.467176	*	0.257603	GO:0005840//ribosome;GO:0010494//cytoplasmic stress granule;GO:0005634//nucleus;GO:0005739//mitochondrion;GO:0005853//eukaryotic translation elongation factor 1 complex;GO:0005737//cytoplasm	GO:0003746//translation elongation factor activity;GO:0005085//guanyl-nucleotide exchange factor activity	GO:0006414//translational elongation	K03233//elongation factor 1-gamma	NP_012842.1//translation elongation factor EF1B gamma [Saccharomyces cerevisiae S288C]
BK006949.2_mrna_5974	1752	2273.45	2492.11	0.132487	0.643338	*	0.432852	GO:0005634//nucleus;GO:0005737//cytoplasm	GO:0016279//protein-lysine N-methyltransferase activity	GO:0018026//peptidyl-lysine monomethylation;GO:0018023//peptidyl-lysine trimethylation;GO:0018027//peptidyl-lysine dimethylation	K12879//THO complex subunit 2	NP_015116.1//protein-lysine N-methyltransferase [Saccharomyces cerevisiae S288C]
BK006941.2_mrna_2258	987	1217.65	2149.78	0.820092	0.00602095	*	0.000760806	GO:0005743//mitochondrial inner membrane;GO:0005739//mitochondrion	GO:0052689//carboxylic ester hydrolase activity;GO:0016740//transferase activity;GO:0003986//acetyl-CoA hydrolase activity;GO:0004623//phospholipase A2 activity	GO:0055088//lipid homeostasis;GO:0035965//cardiolipin acyl-chain remodeling	NA	NP_011529.1//putative hydrolase [Saccharomyces cerevisiae S288C]
BK006934.2_mrna_2825	4674	2832.79	1893.17	-0.581416	0.109189	*	0.0311029	GO:0010494//cytoplasmic stress granule;GO:0031931//TORC1 complex;GO:0000329//fungal-type vacuole membrane;GO:0005739//mitochondrion;GO:0005886//plasma membrane;GO:0005737//cytoplasm	GO:0043130//ubiquitin binding;GO:0030674//protein binding, bridging	GO:0001558//regulation of cell growth;GO:0031929//TOR signaling;GO:0009267//cellular response to starvation;GO:0008361//regulation of cell size;GO:0071902//positive regulation of protein serine/threonine kinase activity;GO:0031139//positive regulation of conjugation with cellular fusion;GO:0030307//positive regulation of cell growth;GO:0071230//cellular response to amino acid stimulus	K07204//regulatory associated protein of mTOR	NP_012056.1//ubiquitin-binding TORC1 subunit KOG1 [Saccharomyces cerevisiae S288C]
BK006947.3_mrna_5144	3537	6229.99	4806.8	-0.374154	0.0851087	*	0.0221781	GO:0005783//endoplasmic reticulum;GO:0032541//cortical endoplasmic reticulum;GO:0016021//integral component of membrane;GO:0071944//cell periphery;GO:0005886//plasma membrane;GO:0005933//cellular bud	GO:0008289//lipid binding	GO:0090158//endoplasmic reticulum membrane organization;GO:0060304//regulation of phosphatidylinositol dephosphorylation;GO:0061817//endoplasmic reticulum-plasma membrane tethering;GO:0006869//lipid transport	NA	NP_014312.1//tricalbin [Saccharomyces cerevisiae S288C]
BK006941.2_mrna_2478	1236	1695.93	1185.71	-0.516325	0.0237648	*	0.00414442	GO:0005737//cytoplasm	GO:0005525//GTP binding;GO:0016887//ATPase activity	NA	K06942//ribosome-binding ATPase	NP_011726.1//hypothetical protein YGR210C [Saccharomyces cerevisiae S288C]
BK006948.2_mrna_5340	711	1366.48	1006.11	-0.441678	0.0884648	*	0.0233334	GO:0005779//integral component of peroxisomal membrane;GO:1990429//peroxisomal importomer complex;GO:0005783//endoplasmic reticulum;GO:0005777//peroxisome;GO:0005778//peroxisomal membrane	NA	GO:0007031//peroxisome organization;GO:0019395//fatty acid oxidation;GO:0007165//signal transduction;GO:0044375//regulation of peroxisome size;GO:0016559//peroxisome fission	K16231//fungal type III polyketide synthase;K13352//peroxin-11B	NP_014494.1//Pex11p [Saccharomyces cerevisiae S288C]
BK006940.2_mrna_1842	1127	1763.28	3620.46	1.03792	0.00193952	Up	0.000210344	NA	GO:0018456//aryl-alcohol dehydrogenase (NAD+) activity	GO:0006081//cellular aldehyde metabolic process	K17647//versiconal hemiacetal acetate reductase [EC:1.1.1.353];K07005//uncharacterized protein	P43547.1//PUTATIVE PSEUDOGENE: RecName: Full=Putative aryl-alcohol dehydrogenase AAD6
BK006937.2_mrna_659	1074	3898.68	3447.88	-0.177274	0.456561	*	0.24811	GO:0000329//fungal-type vacuole membrane;GO:0005783//endoplasmic reticulum;GO:0016021//integral component of membrane;GO:0031227//intrinsic component of endoplasmic reticulum membrane	GO:0016788//hydrolase activity, acting on ester bonds	GO:0006506//GPI anchor biosynthetic process;GO:0030026//cellular manganese ion homeostasis	NA	NP_009973.1//Per1p [Saccharomyces cerevisiae S288C]
BK006942.2_mrna_2978	2037	1391.18	1250.73	-0.153544	0.513064	*	0.299882	GO:0005774//vacuolar membrane;GO:0000324//fungal-type vacuole;GO:0016021//integral component of membrane	NA	NA	NA	NP_012197.1//hypothetical protein YIL067C [Saccharomyces cerevisiae S288C]
BK006938.2_mrna_1431	1992	4496.47	4585.65	0.0283339	0.916436	*	0.825789	GO:0034399//nuclear periphery;GO:0005635//nuclear envelope;GO:0005637//nuclear inner membrane;GO:0016021//integral component of membrane	NA	NA	K11294//nucleolin;K11135//Pin2-interacting protein X1	NP_010746.1//Heh2p [Saccharomyces cerevisiae S288C]
BK006943.2_mrna_3236	2646	2193.06	1858.59	-0.238736	0.657333	*	0.450154	NA	NA	NA	K22493//agglutinin-like protein;K19851//flocculation protein FLO11	AJV41607.1//Pry3p [Saccharomyces cerevisiae YJM1342]
BK006941.2_mrna_2526	1101	2052.93	2435.25	0.246385	0.348555	*	0.164623	GO:0005743//mitochondrial inner membrane;GO:0016021//integral component of membrane;GO:0005739//mitochondrion	GO:0030170//pyridoxal phosphate binding;GO:0022857//transmembrane transporter activity	GO:0006879//cellular iron ion homeostasis;GO:0031921//pyridoxal phosphate transport	K15119//solute carrier family 25, member 39/40	NP_011773.3//Mtm1p [Saccharomyces cerevisiae S288C]
BK006936.2_mrna_468	2550	4320.3	4911.51	0.185034	0.424899	*	0.220168	GO:0005634//nucleus	GO:0005524//ATP binding;GO:0004386//helicase activity;GO:0008186//RNA-dependent ATPase activity;GO:0003676//nucleic acid binding	GO:0000348//mRNA branch site recognition	K12811//ATP-dependent RNA helicase DDX46/PRP5 [EC:3.6.4.13]	NP_009796.1//DEAD-box RNA helicase PRP5 [Saccharomyces cerevisiae S288C]
BK006946.2_mrna_4672	960	2190.65	14910.1	2.76687	1.54683e-34	Up	8.02538e-37	GO:0005634//nucleus;GO:0005829//cytosol;GO:0022627//cytosolic small ribosomal subunit;GO:0005737//cytoplasm	GO:0043022//ribosome binding;GO:0005080//protein kinase C binding;GO:0001965//G-protein alpha-subunit binding;GO:0005092//GDP-dissociation inhibitor activity;GO:0019899//enzyme binding	GO:0060733//regulation of eIF2 alpha phosphorylation by amino acid starvation;GO:0007186//G protein-coupled receptor signaling pathway;GO:0000747//conjugation with cellular fusion;GO:0032995//regulation of fungal-type cell wall biogenesis;GO:0031954//positive regulation of protein autophosphorylation;GO:0072344//rescue of stalled ribosome;GO:0001403//invasive growth in response to glucose limitat…	K14753//guanine nucleotide-binding protein subunit beta-2-like 1 protein	NP_013834.1//guanine nucleotide-binding protein subunit beta [Saccharomyces cerevisiae S288C]
BK006941.2_mrna_2115	1935	2213.34	3259.51	0.558432	0.00560681	*	0.00070003	GO:0005768//endosome;GO:0000329//fungal-type vacuole membrane;GO:0035658//Mon1-Ccz1 complex;GO:0005829//cytosol;GO:0032585//multivesicular body membrane	GO:0032266//phosphatidylinositol-3-phosphate binding;GO:0001786//phosphatidylserine binding;GO:0010314//phosphatidylinositol-5-phosphate binding	GO:0032258//protein localization by the Cvt pathway;GO:0006623//protein targeting to vacuole;GO:0048278//vesicle docking;GO:0006914//autophagy;GO:0044395//protein targeting to vacuolar membrane;GO:0043547//positive regulation of GTPase activity;GO:0016236//macroautophagy	K20195//vacuolar fusion protein MON1	NP_011391.2//Mon1p [Saccharomyces cerevisiae S288C]
BK006938.2_mrna_1252	1245	1556.68	1970.5	0.340092	0.323404	*	0.146303	GO:0005743//mitochondrial inner membrane;GO:0016021//integral component of membrane	NA	NA	NA	NP_010568.3//Mrx10p [Saccharomyces cerevisiae S288C]
BK006945.2_mrna_4098	1239	782.214	988.779	0.338084	0.0709066	*	0.0171119	GO:0005829//cytosol	GO:0000287//magnesium ion binding;GO:0004450//isocitrate dehydrogenase (NADP+) activity;GO:0051287//NAD binding;GO:0042803//protein homodimerization activity	GO:0006099//tricarboxylic acid cycle;GO:0006739//NADP metabolic process;GO:0006097//glyoxylate cycle;GO:0006102//isocitrate metabolic process	K00031//isocitrate dehydrogenase [EC:1.1.1.42]	NP_013275.1//isocitrate dehydrogenase (NADP(+)) IDP2 [Saccharomyces cerevisiae S288C]
BK006942.2_mrna_2989	1884	2301.41	1552.81	-0.567631	0.162632	*	0.053836	GO:0005739//mitochondrion	NA	NA	K12486//stromal membrane-associated protein	NP_012209.1//hypothetical protein YIL055C [Saccharomyces cerevisiae S288C]
BK006948.2_mrna_5720	2796	7898.06	6466.79	-0.28845	0.196266	*	0.0701632	GO:0005774//vacuolar membrane;GO:0016021//integral component of membrane;GO:0005802//trans-Golgi network	GO:0004177//aminopeptidase activity;GO:0008236//serine-type peptidase activity	GO:0007323//peptide pheromone maturation;GO:0019236//response to pheromone	K08787//dipeptidyl aminopeptidase Ste13 [EC:3.4.14.-]	NP_014862.3//Ste13p [Saccharomyces cerevisiae S288C]
BK006938.2_mrna_1180	2742	731.659	1074.9	0.554957	0.0249002	*	0.00439243	GO:0016020//membrane;GO:0005634//nucleus;GO:0005737//cytoplasm;GO:0048471//perinuclear region of cytoplasm	GO:0000981//DNA-binding transcription factor activity, RNA polymerase II-specific;GO:0000978//RNA polymerase II proximal promoter sequence-specific DNA binding;GO:0001228//DNA-binding transcription activator activity, RNA polymerase II-specific;GO:0008270//zinc ion binding	GO:0071456//cellular response to hypoxia;GO:0035969//positive regulation of sterol import by positive regulation of transcription from RNA polymerase II promoter;GO:1904741//positive regulation of filamentous growth of a population of unicellular organisms in response to starvation by positive regulation of transcription from RNA polymerase II promoter;GO:0045944//positive regulation of transcrip…	K11771//SWI/SNF chromatin-remodeling complex subunit SWI1	NP_010499.1//Upc2p [Saccharomyces cerevisiae S288C]
BK006939.2_mrna_1691	1563	34084.6	29063.9	-0.229895	0.449231	*	0.241079	GO:0005759//mitochondrial matrix;GO:0005739//mitochondrion	GO:0016620//oxidoreductase activity, acting on the aldehyde or oxo group of donors, NAD or NADP as acceptor;GO:0004030//aldehyde dehydrogenase [NAD(P)+] activity;GO:0004029//aldehyde dehydrogenase (NAD) activity	GO:0019413//acetate biosynthetic process;GO:0006068//ethanol catabolic process	K00128//aldehyde dehydrogenase (NAD+) [EC:1.2.1.3]	NP_010996.2//aldehyde dehydrogenase (NAD(P)(+)) ALD5 [Saccharomyces cerevisiae S288C]
BK006943.2_mrna_3198	681	74.9248	67.1585	-0.157872	0.819656	*	0.65888	GO:0005634//nucleus;GO:0000943//retrotransposon nucleocapsid;GO:0005739//mitochondrion	GO:0003964//RNA-directed DNA polymerase activity;GO:0046872//metal ion binding;GO:0003887//DNA-directed DNA polymerase activity;GO:0003677//DNA binding;GO:0003723//RNA binding;GO:0008233//peptidase activity;GO:0005524//ATP binding;GO:0004523//RNA-DNA hybrid ribonuclease activity;GO:0004540//ribonuclease activity;GO:0004190//aspartic-type endopeptidase activity	GO:0015074//DNA integration;GO:0032197//transposition, RNA-mediated;GO:0006310//DNA recombination	NA	NP_012422.2//gag protein [Saccharomyces cerevisiae S288C]
BK006945.2_mrna_4152	576	4655.86	3164.11	-0.557249	0.000544269	*	4.89788e-05	GO:0031965//nuclear membrane;GO:0000329//fungal-type vacuole membrane;GO:0042995//cell projection;GO:0005938//cell cortex;GO:0043332//mating projection tip;GO:0005934//cellular bud tip;GO:0071944//cell periphery;GO:0005737//cytoplasm;GO:0005935//cellular bud neck;GO:0000131//incipient cellular bud site;GO:0005940//septin ring;GO:0005886//plasma membrane	GO:0005525//GTP binding;GO:0019901//protein kinase binding;GO:0003924//GTPase activity	GO:0000747//conjugation with cellular fusion;GO:0045921//positive regulation of exocytosis;GO:0032956//regulation of actin cytoskeleton organization;GO:0001403//invasive growth in response to glucose limitation;GO:0007118//budding cell apical bud growth;GO:0007015//actin filament organization;GO:0007264//small GTPase mediated signal transduction;GO:0007163//establishment or maintenance of cell po…	K04393//cell division control protein 42	NP_013330.1//Rho family GTPase CDC42 [Saccharomyces cerevisiae S288C]
BK006949.2_mrna_6281	525	3521.2	13686.7	1.95863	3.12462e-21	Up	6.1185e-23	GO:0005840//ribosome;GO:0005634//nucleus;GO:0022625//cytosolic large ribosomal subunit	GO:0003735//structural constituent of ribosome;GO:0019843//rRNA binding	GO:0006412//translation;GO:0000027//ribosomal large subunit assembly;GO:0002181//cytoplasmic translation	K02868//large subunit ribosomal protein L11e	NP_015427.1//ribosomal 60S subunit protein L11A [Saccharomyces cerevisiae S288C]
BK006938.2_mrna_1182	414	12.3829	8.51237	-0.540711	0.47374	*	0.263312	GO:0016021//integral component of membrane	NA	NA	NA	NP_001335759.1//hypothetical protein YDR215C [Saccharomyces cerevisiae S288C]
BK006938.2_mrna_973	1203	38108	45295	0.249255	0.44667	*	0.238324	GO:0005960//glycine cleavage complex;GO:0005739//mitochondrion	GO:0008483//transaminase activity;GO:0004047//aminomethyltransferase activity;GO:0004375//glycine dehydrogenase (decarboxylating) activity	GO:0019464//glycine decarboxylation via glycine cleavage system;GO:0006546//glycine catabolic process;GO:0006730//one-carbon metabolic process;GO:0006544//glycine metabolic process;GO:0055114//oxidation-reduction process	K00605//aminomethyltransferase [EC:2.1.2.10]	NP_010302.1//glycine decarboxylase subunit T [Saccharomyces cerevisiae S288C]
BK006948.2_mrna_5874	1560	13943.8	4435.72	-1.65238	1.72103e-08	Down	8.00748e-10	GO:0042645//mitochondrial nucleoid;GO:0005739//mitochondrion	GO:0016620//oxidoreductase activity, acting on the aldehyde or oxo group of donors, NAD or NADP as acceptor;GO:0043878//glyceraldehyde-3-phosphate dehydrogenase (NAD+) (non-phosphorylating) activity;GO:0004030//aldehyde dehydrogenase [NAD(P)+] activity;GO:0004029//aldehyde dehydrogenase (NAD) activity	GO:0006067//ethanol metabolic process;GO:0006090//pyruvate metabolic process;GO:0006740//NADPH regeneration;GO:0019413//acetate biosynthetic process	K00128//aldehyde dehydrogenase (NAD+) [EC:1.2.1.3]	NP_015019.1//aldehyde dehydrogenase (NADP(+)) ALD4 [Saccharomyces cerevisiae S288C]
BK006945.2_mrna_4169	4671	6235.98	4983.01	-0.3236	0.0601172	*	0.0138345	GO:0005634//nucleus;GO:0005739//mitochondrion	GO:0046872//metal ion binding;GO:0005524//ATP binding;GO:0004386//helicase activity;GO:0004842//ubiquitin-protein transferase activity	GO:0045003//double-strand break repair via synthesis-dependent strand annealing;GO:0006303//double-strand break repair via nonhomologous end joining	K15710//E3 ubiquitin-protein ligase SHPRH [EC:3.6.4.- 2.3.2.27]	NP_013348.1//E3 ubiquitin-protein ligase IRC20 [Saccharomyces cerevisiae S288C]
BK006939.2_mrna_1615	705	3019.91	2442.54	-0.306122	0.128605	*	0.0387215	NA	GO:0008948//oxaloacetate decarboxylase activity;GO:0046872//metal ion binding;GO:0047443//4-hydroxy-4-methyl-2-oxoglutarate aldolase activity	GO:0019619//3,4-dihydroxybenzoate catabolic process	NA	NP_010926.3//bifunctional 4-hydroxy-4-methyl-2-oxoglutarate aldolase/oxaloacetate decarboxylase [Saccharomyces cerevisiae S288C]
BK006936.2_mrna_412	1695	468.405	434.666	-0.107848	0.79859	*	0.62965	GO:0005634//nucleus;GO:0005730//nucleolus;GO:0005694//chromosome	GO:0005524//ATP binding;GO:0016887//ATPase activity	GO:0007131//reciprocal meiotic recombination;GO:0042138//meiotic DNA double-strand break formation;GO:0051598//meiotic recombination checkpoint	K22399//pachytene checkpoint protein 2	NP_009745.2//Pch2p [Saccharomyces cerevisiae S288C]
BK006944.2_mrna_3596	942	1765.55	1867.02	0.0806216	0.83253	*	0.687621	GO:0005634//nucleus;GO:0033588//Elongator holoenzyme complex;GO:0005737//cytoplasm	GO:0005524//ATP binding;GO:0003682//chromatin binding;GO:0051213//dioxygenase activity	GO:0002098//tRNA wobble uridine modification;GO:0006357//regulation of transcription by RNA polymerase II	K15456//protein KTI12	NP_012812.1//Kti12p [Saccharomyces cerevisiae S288C]
BK006945.2_mrna_4320	339	667.653	565.117	-0.240548	0.466564	*	0.256825	GO:0016021//integral component of membrane;GO:0005739//mitochondrion;GO:0031966//mitochondrial membrane	NA	GO:0071555//cell wall organization	NA	NP_013494.3//Ecm19p [Saccharomyces cerevisiae S288C]
BK006946.2_mrna_4785	3309	2836.55	3872.49	0.449124	0.0149134	*	0.0022913	GO:0005829//cytosol;GO:1990071//TRAPPII protein complex;GO:0005802//trans-Golgi network;GO:0005769//early endosome	GO:0017112//Rab guanyl-nucleotide exchange factor activity	GO:0043087//regulation of GTPase activity;GO:0032258//protein localization by the Cvt pathway;GO:0034498//early endosome to Golgi transport;GO:0006891//intra-Golgi vesicle-mediated transport;GO:0016236//macroautophagy	K20307//trafficking protein particle complex subunit 10	NP_013945.1//transport protein particle complex II subunit TRS130 [Saccharomyces cerevisiae S288C]
BK006939.2_mrna_1550	1413	3657.19	3360.54	-0.122042	0.571738	*	0.355386	GO:0005829//cytosol;GO:0005739//mitochondrion;GO:0005886//plasma membrane	GO:0043022//ribosome binding;GO:0000104//succinate dehydrogenase activity;GO:0016156//fumarate reductase (NADH) activity	GO:0006888//ER to Golgi vesicle-mediated transport;GO:0071454//cellular response to anoxia	K18561//FAD-dependent fumarate reductase [EC:1.3.8.-]	KOH51233.1//FRD1p Soluble fumarate reductase [Saccharomyces sp. 'boulardii']
BK006944.2_mrna_3519	1605	498.91	382.339	-0.383928	0.328462	*	0.149624	GO:0005737//cytoplasm	GO:0016740//transferase activity	GO:0017183//peptidyl-diphthamide biosynthetic process from peptidyl-histidine	K17866//diphthamide biosynthesis protein 2	NP_012730.1//Dph2p [Saccharomyces cerevisiae S288C]
BK006934.2_mrna_2711	555	1000.19	1417.44	0.503005	0.0300773	*	0.00560268	GO:0005634//nucleus;GO:0000178//exosome (RNase complex)	GO:0030234//enzyme regulator activity;GO:0003725//double-stranded RNA binding;GO:0003690//double-stranded DNA binding;GO:0044877//protein-containing complex binding	GO:0071033//nuclear retention of pre-mRNA at the site of transcription;GO:0034476//U5 snRNA 3'-end processing;GO:0071028//nuclear mRNA surveillance;GO:0000467//exonucleolytic trimming to generate mature 3'-end of 5.8S rRNA from tricistronic rRNA transcript (SSU-rRNA, 5.8S rRNA, LSU-rRNA);GO:0071035//nuclear polyadenylation-dependent rRNA catabolic process;GO:0071039//nuclear polyadenylation-depen…	K12592//exosome complex protein LRP1	NP_011949.1//Lrp1p [Saccharomyces cerevisiae S288C]
BK006946.2_mrna_4824	405	748.64	608.572	-0.298845	0.197337	*	0.0707771	GO:0005739//mitochondrion	NA	NA	NA	NP_013979.1//hypothetical protein YMR252C [Saccharomyces cerevisiae S288C]
BK006946.2_mrna_4600	2424	303.744	397.424	0.387823	0.340739	*	0.159045	GO:0070545//PeBoW complex;GO:0005634//nucleus;GO:0005654//nucleoplasm;GO:0005730//nucleolus;GO:0030687//preribosome, large subunit precursor	GO:0043021//ribonucleoprotein complex binding;GO:0070180//large ribosomal subunit rRNA binding	GO:0000466//maturation of 5.8S rRNA from tricistronic rRNA transcript (SSU-rRNA, 5.8S rRNA, LSU-rRNA);GO:0000463//maturation of LSU-rRNA from tricistronic rRNA transcript (SSU-rRNA, 5.8S rRNA, LSU-rRNA);GO:0006364//rRNA processing;GO:0042273//ribosomal large subunit biogenesis	K14824//ribosome biogenesis protein ERB1	NP_013764.1//Erb1p [Saccharomyces cerevisiae S288C]
BK006934.2_mrna_2705	1032	2333.63	2263.51	-0.0440107	0.882789	*	0.764148	GO:0005635//nuclear envelope;GO:0005739//mitochondrion	GO:0046872//metal ion binding;GO:0004721//phosphoprotein phosphatase activity;GO:0003824//catalytic activity;GO:0004722//protein serine/threonine phosphatase activity	GO:0006470//protein dephosphorylation	K17508//protein phosphatase PTC7 [EC:3.1.3.16]	NP_011943.2//type 2C protein phosphatase PTC7 [Saccharomyces cerevisiae S288C]
BK006947.3_mrna_5301	2160	991.976	954.836	-0.0550529	0.885542	*	0.768902	GO:0016021//integral component of membrane;GO:0005886//plasma membrane	GO:0046872//metal ion binding;GO:0000293//ferric-chelate reductase activity;GO:0052851//ferric-chelate reductase (NADPH) activity;GO:0016491//oxidoreductase activity	GO:0006879//cellular iron ion homeostasis;GO:0006826//iron ion transport;GO:0015677//copper ion import;GO:0015891//siderophore transport	K13411//dual oxidase [EC:1.6.3.1 1.11.1.-]	NP_014458.1//ferric-chelate reductase [Saccharomyces cerevisiae S288C]
BK006948.2_mrna_5494	4611	2989.22	2587.35	-0.208297	0.667749	*	0.463054	GO:0005634//nucleus;GO:0070822//Sin3-type complex;GO:0032221//Rpd3S complex;GO:0033698//Rpd3L complex;GO:0000785//chromatin;GO:0070210//Rpd3L-Expanded complex	GO:0003677//DNA binding;GO:0003714//transcription corepressor activity;GO:0003713//transcription coactivator activity;GO:0042802//identical protein binding	GO:0061408//positive regulation of transcription from RNA polymerase II promoter in response to heat stress;GO:0061186//negative regulation of chromatin silencing at silent mating-type cassette;GO:0030174//regulation of DNA-dependent DNA replication initiation;GO:0006355//regulation of transcription, DNA-templated;GO:0061587//transfer RNA gene-mediated silencing;GO:0000122//negative regulation of…	K11644//paired amphipathic helix protein Sin3a	NP_014639.1//transcriptional regulator SIN3 [Saccharomyces cerevisiae S288C]
BK006940.2_mrna_1959	888	2199.43	2575.17	0.227533	0.320508	*	0.144179	GO:0005783//endoplasmic reticulum;GO:0016021//integral component of membrane;GO:0005789//endoplasmic reticulum membrane	NA	GO:0006457//protein folding	K09510//DnaJ homolog subfamily B member 4;K14002//DnaJ-related protein SCJ1	NP_116699.3//Erj5p [Saccharomyces cerevisiae S288C]
BK006942.2_mrna_2876	600	37134.9	20653.1	-0.846419	0.000456938	*	4.04552e-05	NA	GO:0016810//hydrolase activity, acting on carbon-nitrogen (but not peptide) bonds;GO:0000257//nitrilase activity	GO:0006807//nitrogen compound metabolic process	K01501//nitrilase [EC:3.5.5.1]	EDV09642.1//nitrilase [Saccharomyces cerevisiae RM11-1a]
BK006943.2_mrna_3138	831	4339.76	5889.69	0.440576	0.0223997	*	0.00385952	GO:0000324//fungal-type vacuole;GO:0005618//cell wall;GO:0005576//extracellular region	NA	GO:0006077//(1->6)-beta-D-glucan metabolic process;GO:0031505//fungal-type cell wall organization;GO:0042546//cell wall biogenesis;GO:0006078//(1->6)-beta-D-glucan biosynthetic process	K14213//Xaa-Pro dipeptidase [EC:3.4.13.9]	NP_012361.1//Kre9p [Saccharomyces cerevisiae S288C]
BK006938.2_mrna_1459	690	2969.73	2916.94	-0.0258747	0.957517	*	0.910876	GO:0010008//endosome membrane;GO:0000329//fungal-type vacuole membrane;GO:0005737//cytoplasm	NA	GO:0032511//late endosome to vacuole transport via multivesicular body sorting pathway;GO:0030447//filamentous growth;GO:0007034//vacuolar transport;GO:0015031//protein transport	K12198//charged multivesicular body protein 5	EDZ72780.1//YDR486Cp-like protein [Saccharomyces cerevisiae AWRI1631]
BK006937.2_mrna_642	408	4176.97	3904.48	-0.0973287	0.764482	*	0.58251	GO:0042645//mitochondrial nucleoid;GO:0009295//nucleoid;GO:0005739//mitochondrion	GO:0003697//single-stranded DNA binding	GO:0006264//mitochondrial DNA replication;GO:0006260//DNA replication;GO:0090297//positive regulation of mitochondrial DNA replication;GO:0000002//mitochondrial genome maintenance;GO:0051096//positive regulation of helicase activity	NA	NP_009958.2//Rim1p [Saccharomyces cerevisiae S288C]
BK006937.2_mrna_550	1008	49642.2	31372.8	-0.662052	0.0256277	*	0.00453364	GO:0005634//nucleus;GO:0005829//cytosol;GO:0005737//cytoplasm	GO:0003700//DNA-binding transcription factor activity	GO:0051321//meiotic cell cycle;GO:0007329//positive regulation of transcription from RNA polymerase II promoter by pheromones;GO:0000742//karyogamy involved in conjugation with cellular fusion	K05925//mRNA m6A methyltransferase [EC:2.1.1.348]	NP_009876.1//Kar4p [Saccharomyces cerevisiae S288C]
BK006943.2_mrna_3331	1536	54522.7	92734.5	0.766249	0.0357802	*	0.00705425	GO:0005739//mitochondrion;GO:0005737//cytoplasm	GO:0005524//ATP binding;GO:0004781//sulfate adenylyltransferase (ATP) activity	GO:0000103//sulfate assimilation;GO:0010134//sulfate assimilation via adenylyl sulfate reduction;GO:0070814//hydrogen sulfide biosynthetic process;GO:0019344//cysteine biosynthetic process;GO:0019379//sulfate assimilation, phosphoadenylyl sulfate reduction by phosphoadenylyl-sulfate reductase (thioredoxin);GO:0000096//sulfur amino acid metabolic process;GO:0009086//methionine biosynthetic process	K00958//sulfate adenylyltransferase [EC:2.7.7.4]	NP_012543.3//sulfate adenylyltransferase [Saccharomyces cerevisiae S288C]
BK006936.2_mrna_382	2097	5637.95	4857.63	-0.214918	0.714499	*	0.517734	GO:0005634//nucleus;GO:0051233//spindle midzone;GO:0000777//condensed chromosome kinetochore;GO:0005737//cytoplasm;GO:0032133//chromosome passenger complex;GO:0005876//spindle microtubule;GO:0005828//kinetochore microtubule	GO:0030295//protein kinase activator activity	GO:0007059//chromosome segregation;GO:0006468//protein phosphorylation;GO:0032465//regulation of cytokinesis	NA	NP_009714.3//Sli15p [Saccharomyces cerevisiae S288C]
BK006947.3_mrna_5153	1224	4078.56	3145.29	-0.374869	0.31603	*	0.141195	GO:0005634//nucleus;GO:0005938//cell cortex;GO:0005935//cellular bud neck	NA	GO:0007088//regulation of mitotic nuclear division	NA	NP_014321.3//Nis1p [Saccharomyces cerevisiae S288C]
BK006946.2_mrna_4806	1377	5338.23	6129.99	0.199525	0.591776	*	0.378555	GO:0005783//endoplasmic reticulum;GO:0016021//integral component of membrane;GO:0046658//anchored component of plasma membrane	GO:0008496//mannan endo-1,6-alpha-mannosidase activity	GO:0007124//pseudohyphal growth;GO:0071555//cell wall organization;GO:0007117//budding cell bud growth;GO:0009272//fungal-type cell wall biogenesis;GO:0016052//carbohydrate catabolic process	K08257//mannan endo-1,6-alpha-mannosidase [EC:3.2.1.101]	NP_013965.1//putative mannan endo-1,6-alpha-mannosidase [Saccharomyces cerevisiae S288C]
BK006948.2_mrna_5718	1455	3328.82	2711.73	-0.295801	0.101897	*	0.0282072	GO:0005794//Golgi apparatus;GO:0000139//Golgi membrane;GO:0005796//Golgi lumen	GO:0051020//GTPase binding	GO:0006888//ER to Golgi vesicle-mediated transport	K20361//intracellular protein transport protein USO1	NP_014859.3//Rud3p [Saccharomyces cerevisiae S288C]
BK006938.2_mrna_1223	2436	14585.1	11787.8	-0.307206	0.230313	*	0.0889258	GO:0005759//mitochondrial matrix;GO:0005739//mitochondrion	GO:0051787//misfolded protein binding;GO:0005524//ATP binding;GO:0016887//ATPase activity	GO:0000002//mitochondrial genome maintenance;GO:0050821//protein stabilization;GO:0042026//protein refolding;GO:0034605//cellular response to heat;GO:0043335//protein unfolding	K03695//ATP-dependent Clp protease ATP-binding subunit ClpB	NP_010544.3//chaperone ATPase HSP78 [Saccharomyces cerevisiae S288C]
BK006945.2_mrna_4354	5799	3669.32	3086.76	-0.249421	0.463512	*	0.253981	GO:0005739//mitochondrion;GO:0005886//plasma membrane;GO:0005737//cytoplasm	GO:0005085//guanyl-nucleotide exchange factor activity	GO:0007264//small GTPase mediated signal transduction;GO:0035556//intracellular signal transduction;GO:0000422//autophagy of mitochondrion	K05727//dedicator of cytokinesis protein 3	NP_013526.1//Dck1p [Saccharomyces cerevisiae S288C]
BK006945.2_mrna_4222	1983	12759.1	3970.11	-1.68427	3.76546e-11	Down	1.39905e-12	GO:0005774//vacuolar membrane;GO:0000324//fungal-type vacuole;GO:0016021//integral component of membrane	GO:0000048//peptidyltransferase activity;GO:0103068//leukotriene C4 gamma-glutamyl transferase activity;GO:0102953//hypoglycin A gamma-glutamyl transpeptidase activity;GO:0036374//glutathione hydrolase activity	GO:0006536//glutamate metabolic process;GO:0006749//glutathione metabolic process;GO:0006751//glutathione catabolic process;GO:0006520//cellular amino acid metabolic process;GO:0006805//xenobiotic metabolic process;GO:0019344//cysteine biosynthetic process	K00681//gamma-glutamyltranspeptidase / glutathione hydrolase [EC:2.3.2.2 3.4.19.13]	NP_013402.1//gamma-glutamyltransferase [Saccharomyces cerevisiae S288C]
BK006943.2_mrna_3191	528	198.089	278.867	0.493424	0.258076	*	0.105001	GO:0005634//nucleus;GO:0005737//cytoplasm	GO:0043022//ribosome binding	GO:0042273//ribosomal large subunit biogenesis	K14814//ribosome biogenesis protein ALB1	NP_012413.1//Alb1p [Saccharomyces cerevisiae S288C]
BK006943.2_mrna_3468	2289	4143.02	4153.37	0.00359675	0.990573	*	0.979915	GO:0005783//endoplasmic reticulum;GO:0097586//dolichyl-phosphate-mannose-protein mannosyltransferase Pmt4p homodimer complex;GO:0016021//integral component of membrane	GO:0042802//identical protein binding;GO:0000030//mannosyltransferase activity;GO:0004169//dolichyl-phosphate-mannose-protein mannosyltransferase activity	GO:1900101//regulation of endoplasmic reticulum unfolded protein response;GO:0035269//protein O-linked mannosylation;GO:0006493//protein O-linked glycosylation	K00728//dolichyl-phosphate-mannose-protein mannosyltransferase [EC:2.4.1.109]	NP_012677.1//dolichyl-phosphate-mannose-protein mannosyltransferase [Saccharomyces cerevisiae S288C]
BK006939.2_mrna_1805	2391	2213.33	1917.51	-0.206989	0.649015	*	0.439375	GO:0005634//nucleus;GO:0035097//histone methyltransferase complex	GO:0046872//metal ion binding;GO:0051864//histone demethylase activity (H3-K36 specific);GO:0043565//sequence-specific DNA binding;GO:0032454//histone demethylase activity (H3-K9 specific);GO:0032452//histone demethylase activity;GO:0003676//nucleic acid binding;GO:0001227//DNA-binding transcription repressor activity, RNA polymerase II-specific	GO:0000122//negative regulation of transcription by RNA polymerase II;GO:0032968//positive regulation of transcription elongation from RNA polymerase II promoter;GO:0006338//chromatin remodeling;GO:0010507//negative regulation of autophagy;GO:0016577//histone demethylation	K19799//DNA damage-responsive transcriptional repressor RPH1	NP_011096.1//Rph1p [Saccharomyces cerevisiae S288C]
BK006945.2_mrna_3965	501	309.104	460.511	0.575144	0.196148	*	0.0700551	GO:0005634//nucleus;GO:0005783//endoplasmic reticulum;GO:0030687//preribosome, large subunit precursor;GO:0005737//cytoplasm	GO:0008270//zinc ion binding;GO:0043023//ribosomal large subunit binding;GO:0003676//nucleic acid binding	GO:0000055//ribosomal large subunit export from nucleus;GO:0000282//cellular bud site selection	K14821//bud site selection protein 20	NP_013175.1//Bud20p [Saccharomyces cerevisiae S288C]
BK006940.2_mrna_1890	1641	34.8077	14.2722	-1.2862	0.033608	Down	0.00647411	GO:0016021//integral component of membrane;GO:0005886//plasma membrane	GO:0005355//glucose transmembrane transporter activity;GO:0015146//pentose transmembrane transporter activity;GO:0022857//transmembrane transporter activity	NA	K08139//MFS transporter, SP family, sugar:H+ symporter	KZV11590.1//HXT10 [Saccharomyces cerevisiae]
BK006938.2_mrna_1081	1698	2989.93	3038.11	0.0230615	0.934567	*	0.862461	NA	GO:0003743//translation initiation factor activity;GO:0003723//RNA binding;GO:0043024//ribosomal small subunit binding	GO:0006364//rRNA processing;GO:0001731//formation of translation preinitiation complex	K15027//translation initiation factor 2D	NP_010402.3//Tma64p [Saccharomyces cerevisiae S288C]
BK006936.2_mrna_199	1062	11670.1	7521.31	-0.633767	0.0359218	*	0.0071062	GO:0010494//cytoplasmic stress granule;GO:0005634//nucleus;GO:0043332//mating projection tip;GO:0005739//mitochondrion;GO:0005737//cytoplasm;GO:0042597//periplasmic space	GO:0005524//ATP binding;GO:0004672//protein kinase activity;GO:0042802//identical protein binding;GO:0004707//MAP kinase activity	GO:0046827//positive regulation of protein export from nucleus;GO:0010468//regulation of gene expression;GO:0071507//pheromone response MAPK cascade;GO:0006468//protein phosphorylation;GO:0075296//positive regulation of ascospore formation;GO:0035556//intracellular signal transduction;GO:0007050//cell cycle arrest;GO:0046777//protein autophosphorylation;GO:0071310//cellular response to organic su…	K04371//mitogen-activated protein kinase 1/3 [EC:2.7.11.24]	NP_009537.1//mitogen-activated serine/threonine-protein kinase FUS3 [Saccharomyces cerevisiae S288C]
BK006943.2_mrna_3222	2076	4623.65	4768.24	0.0444244	0.887081	*	0.773027	GO:0005887//integral component of plasma membrane;GO:0016021//integral component of membrane;GO:0071944//cell periphery;GO:0005886//plasma membrane	GO:0005249//voltage-gated potassium channel activity;GO:0005267//potassium channel activity;GO:0022841//potassium ion leak channel activity	GO:0030007//cellular potassium ion homeostasis;GO:0034765//regulation of ion transmembrane transport;GO:0030322//stabilization of membrane potential;GO:0071805//potassium ion transmembrane transport	K05389//potassium channel subfamily K, other eukaryote	NP_012442.1//Tok1p [Saccharomyces cerevisiae S288C]
BK006939.2_mrna_1743	345	557.157	235.317	-1.24347	3.0084e-07	Down	1.61119e-08	NA	NA	NA	NA	NP_011047.3//hypothetical protein YER121W [Saccharomyces cerevisiae S288C]
BK006938.2_mrna_843	2658	3476.59	3070.71	-0.179099	0.644791	*	0.434788	GO:0005634//nucleus;GO:0000142//cellular bud neck contractile ring;GO:0044697//HICS complex;GO:0005737//cytoplasm;GO:0005935//cellular bud neck	GO:0030234//enzyme regulator activity	GO:1990344//secondary cell septum biogenesis	K20521//myosin tail region-interacting protein MTI1	NP_010166.1//Cyk3p [Saccharomyces cerevisiae S288C]
BK006940.2_mrna_1949	264	5.03929	5.62417	0.158419	0.875749	*	0.755416	GO:0016021//integral component of membrane	NA	NA	NA	NP_878072.1//hypothetical protein YFR032C-B [Saccharomyces cerevisiae S288C]
BK006934.2_mrna_2683	2652	3864.33	4270.07	0.144044	0.658672	*	0.452086	GO:0016586//RSC-type complex	GO:0000981//DNA-binding transcription factor activity, RNA polymerase II-specific;GO:0003677//DNA binding;GO:0008270//zinc ion binding	GO:0006368//transcription elongation from RNA polymerase II promoter;GO:0006355//regulation of transcription, DNA-templated;GO:0006303//double-strand break repair via nonhomologous end joining;GO:0006337//nucleosome disassembly	K11758//chromatin structure-remodeling complex subunit RSC3/30	NP_011923.2//Rsc30p [Saccharomyces cerevisiae S288C]
BK006949.2_mrna_6376	1290	1943.57	1914.65	-0.0216309	0.948787	*	0.893541	GO:0005634//nucleus;GO:0005654//nucleoplasm	GO:0001002//RNA polymerase III type 1 promoter sequence-specific DNA binding;GO:0003723//RNA binding;GO:0046872//metal ion binding;GO:0001010//RNA polymerase II sequence-specific DNA-binding transcription factor recruiting activity;GO:0003676//nucleic acid binding	GO:0042791//5S class rRNA transcription by RNA polymerase III	K09191//general transcription factor IIIA	NP_015512.1//Pzf1p [Saccharomyces cerevisiae S288C]
BK006941.2_mrna_2440	513	2031.25	1060.06	-0.938229	4.16028e-09	*	1.79374e-10	GO:0016021//integral component of membrane;GO:0005743//mitochondrial inner membrane;GO:0005739//mitochondrion;GO:0032592//integral component of mitochondrial membrane	NA	GO:0034551//mitochondrial respiratory chain complex III assembly	NA	NP_011690.3//Cbp4p [Saccharomyces cerevisiae S288C]
BK006938.2_mrna_1515	5391	1883	1803.02	-0.0626132	0.893951	*	0.786893	GO:0005634//nucleus	GO:0005524//ATP binding;GO:0004386//helicase activity;GO:0003678//DNA helicase activity;GO:0003676//nucleic acid binding	GO:0000722//telomere maintenance via recombination	K01183//chitinase [EC:3.2.1.14]	NP_010834.1//Y' element ATP-dependent helicase protein 1 copy 1 [Saccharomyces cerevisiae S288C]
BK006947.3_mrna_5127	2019	9002.68	8174.35	-0.139251	0.561075	*	0.344251	GO:0005634//nucleus;GO:0089713//Cbf1-Met4-Met28 complex	GO:0003677//DNA binding;GO:0003713//transcription coactivator activity	GO:0046686//response to cadmium ion;GO:0045944//positive regulation of transcription by RNA polymerase II;GO:0046685//response to arsenic-containing substance;GO:0019344//cysteine biosynthetic process;GO:0000096//sulfur amino acid metabolic process;GO:0009086//methionine biosynthetic process	K03114//mitosis inhibitor protein kinase SWE1 [EC:2.7.11.1];K17974//protein JSN1;K09184//GATA-binding protein, other eukaryote	NP_014296.4//Met4p [Saccharomyces cerevisiae S288C]
BK006944.2_mrna_3737	969	1510.81	1953.64	0.370839	0.150622	*	0.0481235	GO:0005634//nucleus;GO:0005783//endoplasmic reticulum;GO:0071008//U2-type post-mRNA release spliceosomal complex;GO:0005681//spliceosomal complex;GO:0005737//cytoplasm	NA	GO:0000390//spliceosomal complex disassembly	NA	NP_012947.1//Ntr2p [Saccharomyces cerevisiae S288C]
BK006937.2_mrna_619	954	1687.72	1137.02	-0.569815	0.0428565	*	0.00894428	NA	GO:0042131//thiamine phosphate phosphatase activity	GO:0006817//phosphate ion transport	K22911//thiamine phosphate phosphatase / amino-HMP aminohydrolase [EC:3.1.3.100 3.5.99.-]	NP_009941.2//Cto1p [Saccharomyces cerevisiae S288C]
BK006936.2_mrna_530	222	0.836259	0.802292	-0.0598221	0.92738	*	0.848779	NA	NA	NA	NA	NP_878056.1//hypothetical protein YBR298C-A [Saccharomyces cerevisiae S288C]
BK006946.2_mrna_4674	642	444.017	779.314	0.811591	0.000204207	*	1.71568e-05	GO:0000778//condensed nuclear chromosome kinetochore;GO:0000780//condensed nuclear chromosome, centromeric region;GO:0031262//Ndc80 complex	GO:0042802//identical protein binding;GO:0005200//structural constituent of cytoskeleton	GO:0007059//chromosome segregation;GO:0051301//cell division;GO:0007049//cell cycle;GO:0007020//microtubule nucleation	K11557//kinetochore protein Spc24, fungi type	NP_013835.1//kinetochore-associated Ndc80 complex subunit SPC24 [Saccharomyces cerevisiae S288C]
BK006948.2_mrna_5554	2025	2802.07	3218.55	0.19992	0.448563	*	0.240235	GO:1990143//CoA-synthesizing protein complex;GO:0071513//phosphopantothenoylcysteine decarboxylase complex	GO:0004864//protein phosphatase inhibitor activity;GO:0042802//identical protein binding;GO:0003824//catalytic activity;GO:0004633//phosphopantothenoylcysteine decarboxylase activity	GO:0030004//cellular monovalent inorganic cation homeostasis	K11244//cell wall integrity and stress response component;K19898//alpha-agglutinin	GAX67908.1//phosphopantothenoylcysteine decarboxylase complex subunit [Saccharomyces cerevisiae]
BK006939.2_mrna_1700	633	3126.5	2239.83	-0.481159	0.0463967	*	0.00994714	GO:0005634//nucleus;GO:0005737//cytoplasm	NA	NA	NA	NP_011002.1//hypothetical protein YER079W [Saccharomyces cerevisiae S288C]
BK006942.2_mrna_3019	570	832.406	247.228	-1.75145	2.14612e-14	Down	6.68081e-16	NA	NA	NA	NA	NP_012240.3//hypothetical protein YIL024C [Saccharomyces cerevisiae S288C]
BK006935.2_mrna_99	612	26.6349	28.0215	0.0732158	0.931563	*	0.858441	GO:0005886//plasma membrane;GO:0031225//anchored component of membrane	NA	NA	NA	NP_009430.1//hypothetical protein YAR066W [Saccharomyces cerevisiae S288C]
BK006949.2_mrna_6077	2082	11211.1	9588.96	-0.225487	0.552824	*	0.335765	GO:0005634//nucleus;GO:0005829//cytosol;GO:0005737//cytoplasm;GO:0005844//polysome	GO:0005524//ATP binding;GO:0042277//peptide binding;GO:0005516//calmodulin binding;GO:0000774//adenyl-nucleotide exchange factor activity	GO:0006457//protein folding;GO:0043161//proteasome-mediated ubiquitin-dependent protein catabolic process;GO:0010499//proteasomal ubiquitin-independent protein catabolic process;GO:0042026//protein refolding	K09485//heat shock protein 110kDa	NP_015219.1//adenyl-nucleotide exchange factor SSE1 [Saccharomyces cerevisiae S288C]
BK006946.2_mrna_4469	768	6615.56	34433.5	2.37988	5.05022e-25	Up	6.20666e-27	GO:0030686//90S preribosome;GO:0005829//cytosol;GO:0022627//cytosolic small ribosomal subunit	GO:0003735//structural constituent of ribosome	GO:0000462//maturation of SSU-rRNA from tricistronic rRNA transcript (SSU-rRNA, 5.8S rRNA, LSU-rRNA);GO:0006412//translation;GO:0002181//cytoplasmic translation	K02984//small subunit ribosomal protein S3Ae	NP_013648.1//ribosomal 40S subunit protein S1B [Saccharomyces cerevisiae S288C]
BK006934.2_mrna_2684	618	1820.71	1439.39	-0.339043	0.109627	*	0.0312828	GO:0000324//fungal-type vacuole;GO:0005576//extracellular region	GO:0003755//peptidyl-prolyl cis-trans isomerase activity;GO:0051082//unfolded protein binding;GO:0016018//cyclosporin A binding	GO:0006457//protein folding;GO:0042026//protein refolding	K01802//peptidylprolyl isomerase [EC:5.2.1.8];K03768//peptidyl-prolyl cis-trans isomerase B (cyclophilin B) [EC:5.2.1.8];K03770//peptidyl-prolyl cis-trans isomerase D [EC:5.2.1.8]	NP_011924.1//peptidylprolyl isomerase CPR2 [Saccharomyces cerevisiae S288C]
BK006948.2_mrna_5865	2991	3306.75	2872.73	-0.202993	0.44153	*	0.234103	GO:0005634//nucleus;GO:0016021//integral component of membrane;GO:0089716//Pip2-Oaf1 complex	GO:0000978//RNA polymerase II proximal promoter sequence-specific DNA binding;GO:0000981//DNA-binding transcription factor activity, RNA polymerase II-specific;GO:0001228//DNA-binding transcription activator activity, RNA polymerase II-specific;GO:0008270//zinc ion binding	GO:0032000//positive regulation of fatty acid beta-oxidation;GO:0045944//positive regulation of transcription by RNA polymerase II;GO:0061429//positive regulation of transcription from RNA polymerase II promoter by oleic acid	K09247//heme activator protein 1	NP_015008.3//oleate-activated transcription factor PIP2 [Saccharomyces cerevisiae S288C]
BK006947.3_mrna_5126	1860	75654.6	60352.3	-0.326018	0.464831	*	0.255612	GO:0005739//mitochondrion;GO:0005737//cytoplasm	GO:0003852//2-isopropylmalate synthase activity	GO:0009098//leucine biosynthetic process	K01649//2-isopropylmalate synthase [EC:2.3.3.13]	NP_014295.1//2-isopropylmalate synthase LEU4 [Saccharomyces cerevisiae S288C]
BK006946.2_mrna_4736	240	23.9316	26.2039	0.130866	0.871811	*	0.74983	GO:0005737//cytoplasm	GO:0005543//phospholipid binding	GO:0042631//cellular response to water deprivation	NA	NP_013900.1//Sip18p [Saccharomyces cerevisiae S288C]
BK006947.3_mrna_5312	1029	197.037	160.827	-0.292952	0.47208	*	0.261758	NA	GO:0030246//carbohydrate binding;GO:0004034//aldose 1-epimerase activity;GO:0016853//isomerase activity	GO:0006006//glucose metabolic process;GO:0033499//galactose catabolic process via UDP-galactose;GO:0005975//carbohydrate metabolic process	K01784//UDP-glucose 4-epimerase [EC:5.1.3.2];K01785//aldose 1-epimerase [EC:5.1.3.3]	EGA84218.1//YNR071C-like protein [Saccharomyces cerevisiae VL3]
BK006949.2_mrna_6108	2358	3190.77	4009.05	0.329355	0.270134	*	0.112891	GO:0005635//nuclear envelope	GO:0000978//RNA polymerase II proximal promoter sequence-specific DNA binding;GO:0001228//DNA-binding transcription activator activity, RNA polymerase II-specific	GO:0072363//regulation of glycolytic process by positive regulation of transcription from RNA polymerase II promoter;GO:0060963//positive regulation of ribosomal protein gene transcription by RNA polymerase II;GO:0034728//nucleosome organization;GO:0045944//positive regulation of transcription by RNA polymerase II;GO:0000433//carbon catabolite repression of transcription from RNA polymerase II pr…	K21646//glycolytic genes transcriptional activator GCR1	NP_015250.1//transcription regulator GCR1 [Saccharomyces cerevisiae S288C]
BK006941.2_mrna_2161	963	513.177	610.102	0.249595	0.705927	*	0.506269	NA	NA	NA	NA	NP_011434.1//hypothetical protein YGL081W [Saccharomyces cerevisiae S288C]
BK006946.2_mrna_4547	1995	3682.33	2715.05	-0.439642	0.221319	*	0.0839501	GO:0005783//endoplasmic reticulum;GO:0005576//extracellular region;GO:0071944//cell periphery;GO:0005886//plasma membrane;GO:0005737//cytoplasm;GO:0031225//anchored component of membrane;GO:0042597//periplasmic space	GO:0004622//lysophospholipase activity;GO:0004623//phospholipase A2 activity	GO:0009395//phospholipid catabolic process;GO:0006650//glycerophospholipid metabolic process;GO:0036151//phosphatidylcholine acyl-chain remodeling;GO:0046475//glycerophospholipid catabolic process	K13333//lysophospholipase [EC:3.1.1.5]	NP_013721.1//lysophospholipase [Saccharomyces cerevisiae S288C]
BK006948.2_mrna_5802	2241	3177.31	5173.19	0.703248	1.0715e-06	*	6.25865e-08	GO:0016020//membrane;GO:0034044//exomer complex	NA	GO:0000282//cellular bud site selection;GO:0015031//protein transport;GO:0006893//Golgi to plasma membrane transport;GO:0034221//fungal-type cell wall chitin biosynthetic process	K19881//Chs5-Arf1p-binding protein BUD7/BCH1	NP_014943.1//exomer complex subunit [Saccharomyces cerevisiae S288C]
BK006948.2_mrna_5347	1272	15855.6	22449.1	0.501664	0.160709	*	0.0529332	GO:0005759//mitochondrial matrix;GO:0005739//mitochondrion	GO:0003992//N2-acetyl-L-ornithine:2-oxoglutarate 5-aminotransferase activity;GO:0008483//transaminase activity;GO:0030170//pyridoxal phosphate binding	GO:0006525//arginine metabolic process;GO:0006592//ornithine biosynthetic process;GO:0006526//arginine biosynthetic process	K00818//acetylornithine aminotransferase [EC:2.6.1.11]	NP_014501.1//acetylornithine transaminase [Saccharomyces cerevisiae S288C]
BK006940.2_mrna_1872	1494	6793.43	5884.84	-0.207136	0.656052	*	0.447762	GO:0005622//intracellular;GO:0005789//endoplasmic reticulum membrane	GO:0017137//Rab GTPase binding;GO:0005096//GTPase activator activity	GO:0006888//ER to Golgi vesicle-mediated transport;GO:0016192//vesicle-mediated transport	K20372//TBC1 domain family member 20	NP_444296.1//Gyp8p [Saccharomyces cerevisiae S288C]
BK006947.3_mrna_5285	2682	1534.97	1421.07	-0.111233	0.808901	*	0.641435	GO:0005634//nucleus;GO:0043332//mating projection tip;GO:0005886//plasma membrane;GO:0005737//cytoplasm	GO:0004674//protein serine/threonine kinase activity;GO:0005524//ATP binding;GO:0004672//protein kinase activity	GO:0061092//positive regulation of phospholipid translocation;GO:0018105//peptidyl-serine phosphorylation;GO:0006869//lipid transport;GO:0006468//protein phosphorylation;GO:0044387//negative regulation of protein kinase activity by regulation of protein phosphorylation;GO:0000749//response to pheromone triggering conjugation with cellular fusion;GO:0046777//protein autophosphorylation;GO:2000370/…	K08286//protein-serine/threonine kinase [EC:2.7.11.-]	NP_014445.1//serine/threonine protein kinase FPK1 [Saccharomyces cerevisiae S288C]
BK006946.2_mrna_4626	438	3679.99	3521.51	-0.0635069	0.825314	*	0.671026	GO:0005634//nucleus;GO:0005829//cytosol;GO:0005737//cytoplasm	GO:0003677//DNA binding	GO:0010421//hydrogen peroxide-mediated programmed cell death	K06875//programmed cell death protein 5	EIW08334.1//hypothetical protein CENPK1137D_104 [Saccharomyces cerevisiae CEN.PK113-7D]
BK006938.2_mrna_818	2073	1644.63	1628.51	-0.014209	0.978389	*	0.95376	GO:0005634//nucleus;GO:0016021//integral component of membrane;GO:0005737//cytoplasm	GO:0004078//biotin-[methylcrotonoyl-CoA-carboxylase] ligase activity;GO:0004080//biotin-[propionyl-CoA-carboxylase (ATP-hydrolyzing)] ligase activity;GO:0005524//ATP binding;GO:0004079//biotin-[methylmalonyl-CoA-carboxytransferase] ligase activity;GO:0004077//biotin-[acetyl-CoA-carboxylase] ligase activity;GO:0071734//biotin-[pyruvate-carboxylase] ligase activity	GO:0006464//cellular protein modification process;GO:0009305//protein biotinylation	K01942//biotin---protein ligase [EC:6.3.4.9 6.3.4.10 6.3.4.11 6.3.4.15]	NP_010140.1//biotin--[acetyl-CoA-carboxylase] ligase BPL1 [Saccharomyces cerevisiae S288C]
BK006936.2_mrna_301	2931	5991.45	5005.16	-0.25949	0.247324	*	0.0984327	GO:0000329//fungal-type vacuole membrane;GO:0016021//integral component of membrane	GO:0046872//metal ion binding;GO:0008233//peptidase activity;GO:0008237//metallopeptidase activity	NA	K01264//aminopeptidase Y [EC:3.4.11.15];K01302//carboxypeptidase Q [EC:3.4.17.-];K13095//splicing factor 1	NP_009630.3//Pff1p [Saccharomyces cerevisiae S288C]
BK006934.2_mrna_2770	345	4146.77	1729.98	-1.26123	2.15782e-07	Down	1.13037e-08	NA	GO:0004866//endopeptidase inhibitor activity	GO:0042144//vacuole fusion, non-autophagic	NA	NP_012006.1//hypothetical protein YHR138C [Saccharomyces cerevisiae S288C]
BK006939.2_mrna_1826	426	122.382	138.643	0.179978	0.820626	*	0.660864	NA	NA	NA	NA	NP_011114.1//hypothetical protein YER187W [Saccharomyces cerevisiae S288C]
BK006948.2_mrna_5499	1635	6292.66	7285.4	0.211339	0.323178	*	0.145984	GO:0005783//endoplasmic reticulum;GO:0016021//integral component of membrane;GO:0005789//endoplasmic reticulum membrane	GO:0042281//dolichyl pyrophosphate Man9GlcNAc2 alpha-1,3-glucosyltransferase activity;GO:0016758//transferase activity, transferring hexosyl groups	GO:0006490//oligosaccharide-lipid intermediate biosynthetic process;GO:0006486//protein glycosylation;GO:0006487//protein N-linked glycosylation;GO:0006488//dolichol-linked oligosaccharide biosynthetic process;GO:0009060//aerobic respiration	K03848//alpha-1,3-glucosyltransferase [EC:2.4.1.267]	NP_014644.1//dolichyl-P-Glc:Man(9)GlcNAc(2)-PP-dolichol alpha-1,3-glucosyltransferase [Saccharomyces cerevisiae S288C]
BK006947.3_mrna_4915	1245	1341.05	1463.81	0.126365	0.656911	*	0.449009	GO:0005783//endoplasmic reticulum;GO:1990531//phospholipid-translocating ATPase complex;GO:0005794//Golgi apparatus;GO:0016021//integral component of membrane;GO:0005886//plasma membrane;GO:0005737//cytoplasm	GO:0004012//phospholipid-translocating ATPase activity;GO:0015247//aminophospholipid transmembrane transporter activity	GO:0044088//regulation of vacuole organization;GO:0045332//phospholipid translocation;GO:0007166//cell surface receptor signaling pathway;GO:0010570//regulation of filamentous growth	NA	NP_014076.1//Lem3p [Saccharomyces cerevisiae S288C]
BK006941.2_mrna_2327	1770	3382.68	3338.21	-0.01909	0.957028	*	0.909604	GO:1990429//peroxisomal importomer complex;GO:0005782//peroxisomal matrix;GO:0005780//extrinsic component of intraperoxisomal membrane	GO:0030674//protein binding, bridging	GO:0016558//protein import into peroxisome matrix	NA	NP_011591.1//Pex8p [Saccharomyces cerevisiae S288C]
BK006938.2_mrna_1315	1824	8107.88	8488.54	0.0661912	0.892649	*	0.784714	GO:0005829//cytosol;GO:0005739//mitochondrion;GO:0005737//cytoplasm	GO:0004814//arginine-tRNA ligase activity;GO:0005524//ATP binding	GO:0032543//mitochondrial translation;GO:0006420//arginyl-tRNA aminoacylation	K01887//arginyl-tRNA synthetase [EC:6.1.1.19]	NP_010628.3//arginine--tRNA ligase [Saccharomyces cerevisiae S288C]
BK006944.2_mrna_3810	1806	965.59	525.751	-0.877031	0.0649981	*	0.0152719	GO:0000324//fungal-type vacuole;GO:0016021//integral component of membrane;GO:0071944//cell periphery;GO:0005886//plasma membrane	GO:0042937//tripeptide transmembrane transporter activity;GO:0015333//peptide:proton symporter activity;GO:1904680//peptide transmembrane transporter activity;GO:0035673//oligopeptide transmembrane transporter activity;GO:0022857//transmembrane transporter activity;GO:0071916//dipeptide transmembrane transporter activity	GO:0042939//tripeptide transport;GO:0006857//oligopeptide transport;GO:0042938//dipeptide transport;GO:0015833//peptide transport;GO:0015031//protein transport	K03305//proton-dependent oligopeptide transporter, POT family	NP_013019.1//Ptr2p [Saccharomyces cerevisiae S288C]
BK006936.2_mrna_208	240	4.9701	3.67811	-0.434308	0.609165	*	0.396365	GO:0005576//extracellular region	NA	NA	NA	NP_878046.1//hypothetical protein YBL008W-A [Saccharomyces cerevisiae S288C]
BK006936.2_mrna_437	318	4.84749	9.99486	1.04395	0.134168	*	0.0411373	GO:0016021//integral component of membrane	NA	NA	NA	NP_001335746.1//hypothetical protein YBR209W [Saccharomyces cerevisiae S288C]
BK006948.2_mrna_5835	4098	4686.02	4663.87	-0.00683363	0.985164	*	0.968649	GO:0005788//endoplasmic reticulum lumen;GO:0005783//endoplasmic reticulum	GO:0051082//unfolded protein binding;GO:0003980//UDP-glucose:glycoprotein glucosyltransferase activity	GO:0070880//fungal-type cell wall beta-glucan biosynthetic process;GO:0006486//protein glycosylation;GO:0018279//protein N-linked glycosylation via asparagine;GO:0071712//ER-associated misfolded protein catabolic process;GO:0071555//cell wall organization	K11718//UDP-glucose:glycoprotein glucosyltransferase [EC:2.4.1.-]	NP_014981.1//Kre5p [Saccharomyces cerevisiae S288C]
BK006944.2_mrna_3548	978	824.578	2519.81	1.61159	0.00476092	Up	0.000576091	GO:0009277//fungal-type cell wall;GO:0005576//extracellular region	GO:0005199//structural constituent of cell wall	GO:0031505//fungal-type cell wall organization	K22020//mucin-19	NP_012758.1//beta-1,3-glucan linked protein [Saccharomyces cerevisiae S288C]
BK006948.2_mrna_5355	327	396.479	74.1688	-2.41836	1.27481e-16	Down	3.52039e-18	NA	NA	NA	NA	NP_014510.1//hypothetical protein YOL131W [Saccharomyces cerevisiae S288C]
BK006949.2_mrna_6234	282	1125.45	851.771	-0.401963	0.0822425	*	0.0211069	GO:0005634//nucleus;GO:0032993//protein-DNA complex;GO:0000790//nuclear chromatin	GO:0031491//nucleosome binding;GO:0003677//DNA binding;GO:0032407//MutSalpha complex binding;GO:0008134//transcription factor binding;GO:0008301//DNA binding, bending	GO:0065004//protein-DNA complex assembly;GO:0006357//regulation of transcription by RNA polymerase II;GO:0043392//negative regulation of DNA binding;GO:0001195//maintenance of transcriptional fidelity during DNA-templated transcription elongation from RNA polymerase III promoter;GO:0006338//chromatin remodeling;GO:0006298//mismatch repair;GO:0034724//DNA replication-independent nucleosome organiz…	K11680//non-histone protein 10;K22483//transcriptional regulator HMO1	NP_015377.1//high-mobility group nucleosome-binding protein [Saccharomyces cerevisiae S288C]
BK006947.3_mrna_4939	4911	4291.1	4218.28	-0.0246929	0.965113	*	0.926993	GO:0005768//endosome;GO:0031901//early endosome membrane;GO:0005794//Golgi apparatus;GO:0019898//extrinsic component of membrane;GO:0005829//cytosol;GO:0005802//trans-Golgi network;GO:0000139//Golgi membrane	GO:0005085//guanyl-nucleotide exchange factor activity	GO:0006623//protein targeting to vacuole;GO:0006895//Golgi to endosome transport;GO:0006897//endocytosis;GO:0015031//protein transport	NA	NP_014102.1//Mon2p [Saccharomyces cerevisiae S288C]
BK006946.2_mrna_4477	1575	1141.62	1709.92	0.58284	0.0220734	*	0.00378665	GO:0005886//plasma membrane;GO:0005737//cytoplasm	GO:0003729//mRNA binding;GO:0046872//metal ion binding;GO:0000166//nucleotide binding;GO:0003938//IMP dehydrogenase activity	GO:0006177//GMP biosynthetic process;GO:0006183//GTP biosynthetic process	K00088//IMP dehydrogenase [EC:1.1.1.205]	GAX69381.1//IMP dehydrogenase [Saccharomyces cerevisiae]
BK006938.2_mrna_1274	654	1246.08	1141.21	-0.126831	0.606811	*	0.393742	GO:0005634//nucleus;GO:0005739//mitochondrion;GO:0005737//cytoplasm	GO:0016787//hydrolase activity;GO:0000166//nucleotide binding;GO:0017111//nucleoside-triphosphatase activity;GO:0003824//catalytic activity;GO:0047710//bis(5'-adenosyl)-triphosphatase activity	GO:0009164//nucleoside catabolic process;GO:0090305//nucleic acid phosphodiester bond hydrolysis;GO:0006259//DNA metabolic process	K01522//bis(5'-adenosyl)-triphosphatase [EC:3.6.1.29]	NP_010591.1//bis(5'-adenosyl)-triphosphatase [Saccharomyces cerevisiae S288C]
BK006949.2_mrna_5955	1005	1755.69	1773.66	0.0146938	0.968122	*	0.933033	GO:0016021//integral component of membrane;GO:0005789//endoplasmic reticulum membrane	GO:0004581//dolichyl-phosphate beta-glucosyltransferase activity	GO:0006487//protein N-linked glycosylation	K00729//dolichyl-phosphate beta-glucosyltransferase [EC:2.4.1.117]	NP_015097.1//dolichyl-phosphate beta-glucosyltransferase [Saccharomyces cerevisiae S288C]
BK006944.2_mrna_3819	1965	3101.26	4160.63	0.423948	0.0824289	*	0.0212039	GO:0005677//chromatin silencing complex;GO:0000775//chromosome, centromeric region	GO:0003682//chromatin binding;GO:0043565//sequence-specific DNA binding	GO:0006343//establishment of chromatin silencing;GO:0030466//chromatin silencing at silent mating-type cassette	K11120//regulatory protein SIR1	AAA35046.1//silent information regulator [Saccharomyces cerevisiae]
BK006938.2_mrna_1091	1011	2839.33	2791.59	-0.0244674	0.92959	*	0.853866	GO:0042175//nuclear outer membrane-endoplasmic reticulum membrane network;GO:0005783//endoplasmic reticulum;GO:0030479//actin cortical patch;GO:0005794//Golgi apparatus;GO:0016021//integral component of membrane;GO:0005789//endoplasmic reticulum membrane;GO:0032432//actin filament bundle	GO:0016409//palmitoyltransferase activity;GO:0019706//protein-cysteine S-palmitoyltransferase activity	GO:0018345//protein palmitoylation;GO:0030010//establishment of cell polarity;GO:0017157//regulation of exocytosis;GO:0006612//protein targeting to membrane;GO:0030866//cortical actin cytoskeleton organization;GO:0042144//vacuole fusion, non-autophagic;GO:0018230//peptidyl-L-cysteine S-palmitoylation	K20003//palmitoyltransferase ZDHHC4 [EC:2.3.1.225]	NP_010411.1//palmitoyltransferase SWF1 [Saccharomyces cerevisiae S288C]
BK006938.2_mrna_1076	1524	5742.87	7551.5	0.394991	0.324336	*	0.147376	GO:0005634//nucleus;GO:0005737//cytoplasm	GO:0008483//transaminase activity;GO:0003824//catalytic activity;GO:0030170//pyridoxal phosphate binding	GO:0042853//L-alanine catabolic process;GO:0009058//biosynthetic process	K00814//alanine transaminase [EC:2.6.1.2]	NP_010396.1//alanine transaminase ALT2 [Saccharomyces cerevisiae S288C]
BK006946.2_mrna_4637	789	353.624	497.094	0.491302	0.142029	*	0.0446887	NA	GO:0004360//glutamine-fructose-6-phosphate transaminase (isomerizing) activity	GO:0006541//glutamine metabolic process;GO:0006047//UDP-N-acetylglucosamine metabolic process;GO:0006002//fructose 6-phosphate metabolic process;GO:0006048//UDP-N-acetylglucosamine biosynthetic process;GO:0006487//protein N-linked glycosylation;GO:0034221//fungal-type cell wall chitin biosynthetic process	K00820//glucosamine---fructose-6-phosphate aminotransferase (isomerizing) [EC:2.6.1.16]	NP_013801.1//putative glutamine--fructose-6-phosphate transaminase [Saccharomyces cerevisiae S288C]
BK006943.2_mrna_3165	1149	1686.78	2152.36	0.351651	0.248401	*	0.0990289	GO:0005739//mitochondrion	NA	NA	NA	NP_012388.1//Mrx5p [Saccharomyces cerevisiae S288C]
BK006949.2_mrna_6345	1323	1344.07	855.729	-0.65138	0.0900698	*	0.0238025	GO:0000943//retrotransposon nucleocapsid;GO:0005737//cytoplasm	GO:0003723//RNA binding	GO:0032197//transposition, RNA-mediated	NA	NP_058196.1//gag protein [Saccharomyces cerevisiae S288C]
BK006938.2_mrna_1096	1671	3618.36	3238.79	-0.15988	0.623946	*	0.41217	GO:0005773//vacuole;GO:0019005//SCF ubiquitin ligase complex	GO:0030674//protein binding, bridging;GO:0016874//ligase activity	GO:0031146//SCF-dependent proteasomal ubiquitin-dependent protein catabolic process;GO:0016567//protein ubiquitination	NA	NP_010416.1//hypothetical protein YDR131C [Saccharomyces cerevisiae S288C]
BK006943.2_mrna_3110	2277	2247.45	2529.96	0.170827	0.592537	*	0.379819	GO:0005634//nucleus	GO:0000981//DNA-binding transcription factor activity, RNA polymerase II-specific;GO:0003677//DNA binding;GO:0008270//zinc ion binding	GO:0045944//positive regulation of transcription by RNA polymerase II;GO:0006351//transcription, DNA-templated	K09248//proline utilization trans-activator;K00480//salicylate hydroxylase [EC:1.14.13.1];K01684//galactonate dehydratase [EC:4.2.1.6];K09241//transcriptional regulatory protein GAL4	NP_012329.1//hypothetical protein YJL206C [Saccharomyces cerevisiae S288C]
BK006936.2_mrna_356	987	2151.73	2993.76	0.47646	0.0552087	*	0.0124554	GO:0005739//mitochondrion;GO:0005886//plasma membrane;GO:0005737//cytoplasm	GO:0005546//phosphatidylinositol-4,5-bisphosphate binding	GO:1902647//negative regulation of 1-phosphatidyl-1D-myo-inositol 4,5-bisphosphate biosynthetic process	NA	NP_009687.1//Opy1p [Saccharomyces cerevisiae S288C]
BK006944.2_mrna_3493	1851	1531.29	1383.19	-0.146745	0.65873	*	0.452457	GO:0000324//fungal-type vacuole;GO:0016021//integral component of membrane;GO:0071944//cell periphery;GO:0005739//mitochondrion;GO:0005886//plasma membrane	GO:0015355//secondary active monocarboxylate transmembrane transporter activity;GO:0015136//sialic acid transmembrane transporter activity;GO:0097079//selenite:proton symporter activity;GO:0046943//carboxylic acid transmembrane transporter activity	GO:0097080//plasma membrane selenite transport;GO:0046942//carboxylic acid transport;GO:0006849//plasma membrane pyruvate transport;GO:0035879//plasma membrane lactate transport	K08178//MFS transporter, SHS family, lactate transporter	NP_012705.1//Jen1p [Saccharomyces cerevisiae S288C]
BK006939.2_mrna_1722	2265	1271.09	997.379	-0.349858	0.107109	*	0.0302057	GO:0005737//cytoplasm	GO:0004843//thiol-dependent ubiquitin-specific protease activity;GO:0004197//cysteine-type endopeptidase activity	GO:0006511//ubiquitin-dependent protein catabolic process;GO:0016579//protein deubiquitination	K11872//ubiquitin carboxyl-terminal hydrolase 9/13 [EC:3.4.19.12]	NP_011024.1//putative ubiquitin-specific protease UBP9 [Saccharomyces cerevisiae S288C]
BK006949.2_mrna_6278	486	2648.15	2439.39	-0.118464	0.771895	*	0.594391	GO:0016021//integral component of membrane;GO:0005739//mitochondrion;GO:0005741//mitochondrial outer membrane	NA	NA	NA	NP_015423.2//hypothetical protein YPR098C [Saccharomyces cerevisiae S288C]
BK006947.3_mrna_4986	1269	2692.57	2887.79	0.100984	0.781205	*	0.605091	GO:0000445//THO complex part of transcription export complex;GO:0000346//transcription export complex	GO:0003729//mRNA binding	GO:0006406//mRNA export from nucleus	K12880//THO complex subunit 3	NP_014146.1//Tex1p [Saccharomyces cerevisiae S288C]
BK006938.2_mrna_1131	6030	4676.9	3144.9	-0.572539	0.0677421	*	0.0161648	GO:0005770//late endosome;GO:0005829//cytosol;GO:0016021//integral component of membrane;GO:0005798//Golgi-associated vesicle;GO:0005802//trans-Golgi network	GO:0005086//ARF guanyl-nucleotide exchange factor activity	GO:0032012//regulation of ARF protein signal transduction;GO:0006888//ER to Golgi vesicle-mediated transport;GO:0015031//protein transport;GO:0006891//intra-Golgi vesicle-mediated transport;GO:0000045//autophagosome assembly;GO:0016192//vesicle-mediated transport	K18442//brefeldin A-inhibited guanine nucleotide-exchange protein	NP_010454.3//Arf family guanine nucleotide exchange factor SEC7 [Saccharomyces cerevisiae S288C]
BK006934.2_mrna_2621	282	4202.71	4765.38	0.181272	0.471411	*	0.260992	GO:0005758//mitochondrial intermembrane space;GO:0005743//mitochondrial inner membrane;GO:0016021//integral component of membrane;GO:0042721//TIM22 mitochondrial import inner membrane insertion complex;GO:0005739//mitochondrion;GO:0042719//mitochondrial intermembrane space protein transporter complex	GO:0046872//metal ion binding;GO:0051082//unfolded protein binding;GO:0008565//protein transporter activity	GO:0045039//protein import into mitochondrial inner membrane	K17778//mitochondrial import inner membrane translocase subunit TIM10;K17781//mitochondrial import inner membrane translocase subunit TIM13	NP_011869.1//protein transporter TIM10 [Saccharomyces cerevisiae S288C]
BK006946.2_mrna_4779	2349	2305.52	3291.77	0.513769	0.017765	*	0.00286024	GO:0071944//cell periphery;GO:0005739//mitochondrion;GO:0005886//plasma membrane	GO:0016301//kinase activity	GO:0072659//protein localization to plasma membrane	K21842//protein EFR3	EDZ70012.1//YMR212Cp-like protein [Saccharomyces cerevisiae AWRI1631]
BK006943.2_mrna_3170	2424	6101.84	5817.11	-0.0689413	0.842171	*	0.707001	GO:0005634//nucleus;GO:0005737//cytoplasm	GO:0004713//protein tyrosine kinase activity;GO:0004712//protein serine/threonine/tyrosine kinase activity;GO:0004674//protein serine/threonine kinase activity;GO:0005524//ATP binding;GO:0004672//protein kinase activity	GO:0061408//positive regulation of transcription from RNA polymerase II promoter in response to heat stress;GO:0045944//positive regulation of transcription by RNA polymerase II;GO:0006468//protein phosphorylation;GO:0061406//positive regulation of transcription from RNA polymerase II promoter in response to glucose starvation;GO:0010811//positive regulation of cell-substrate adhesion;GO:0045893/…	K18670//dual specificity protein kinase YAK1 [EC:2.7.12.1]	NP_012394.1//serine/threonine protein kinase YAK1 [Saccharomyces cerevisiae S288C]
BK006934.2_mrna_2700	2196	13086.1	12926.2	-0.017736	0.947702	*	0.89203	GO:0005811//lipid droplet;GO:0005789//endoplasmic reticulum membrane	GO:0000250//lanosterol synthase activity;GO:0016866//intramolecular transferase activity	GO:0006696//ergosterol biosynthetic process	K01852//lanosterol synthase [EC:5.4.99.7]	NP_011939.2//lanosterol synthase ERG7 [Saccharomyces cerevisiae S288C]
BK006946.2_mrna_4761	384	4991.87	2726.55	-0.872504	2.98256e-07	*	1.59236e-08	GO:0000329//fungal-type vacuole membrane	NA	NA	NA	NP_013922.1//Icy1p [Saccharomyces cerevisiae S288C]
BK006946.2_mrna_4465	1059	4597.03	4969.01	0.112256	0.696822	*	0.496286	GO:0030134//COPII-coated ER to Golgi transport vesicle;GO:0005783//endoplasmic reticulum;GO:0030173//integral component of Golgi membrane;GO:0030176//integral component of endoplasmic reticulum membrane;GO:0016021//integral component of membrane;GO:0033116//endoplasmic reticulum-Golgi intermediate compartment membrane	NA	GO:0006890//retrograde vesicle-mediated transport, Golgi to ER;GO:0006888//ER to Golgi vesicle-mediated transport;GO:0015031//protein transport	K20366//endoplasmic reticulum-Golgi intermediate compartment protein 2	NP_013644.1//Erv41p [Saccharomyces cerevisiae S288C]
BK006942.2_mrna_2897	2076	3329.95	5284.16	0.666175	1.7723e-05	*	1.22504e-06	GO:0000778//condensed nuclear chromosome kinetochore;GO:0000780//condensed nuclear chromosome, centromeric region;GO:0031262//Ndc80 complex	GO:0042802//identical protein binding;GO:0005200//structural constituent of cytoskeleton	GO:0051315//attachment of mitotic spindle microtubules to kinetochore;GO:0034501//protein localization to kinetochore;GO:0007059//chromosome segregation;GO:0051301//cell division;GO:0007020//microtubule nucleation	K11547//kinetochore protein NDC80	NP_012122.3//kinetochore-associated Ndc80 complex subunit NDC80 [Saccharomyces cerevisiae S288C]
BK006937.2_mrna_599	1566	1168.58	1233.25	0.0777148	0.80922	*	0.642501	GO:0005739//mitochondrion	GO:0005524//ATP binding;GO:0008444//CDP-diacylglycerol-glycerol-3-phosphate 3-phosphatidyltransferase activity	GO:0032049//cardiolipin biosynthetic process	K00995//CDP-diacylglycerol---glycerol-3-phosphate 3-phosphatidyltransferase [EC:2.7.8.5]	NP_009923.2//CDP-diacylglycerol--glycerol-3-phosphate 3-phosphatidyltransferase [Saccharomyces cerevisiae S288C]
BK006936.2_mrna_420	1269	800.037	991.143	0.309026	0.165514	*	0.0552083	GO:0005634//nucleus;GO:0005737//cytoplasm;GO:0033186//CAF-1 complex	GO:0042393//histone binding	GO:0006335//DNA replication-dependent nucleosome assembly	K10752//histone-binding protein RBBP4	NP_009754.1//Msi1p [Saccharomyces cerevisiae S288C]
BK006945.2_mrna_3976	4257	2654.9	2247.83	-0.240122	0.514068	*	0.300852	GO:0005634//nucleus;GO:0000799//nuclear condensin complex;GO:0005737//cytoplasm	GO:0005524//ATP binding;GO:0003682//chromatin binding	GO:0010032//meiotic chromosome condensation;GO:0070058//tRNA gene clustering;GO:0007076//mitotic chromosome condensation;GO:0070550//rDNA condensation;GO:0007130//synaptonemal complex assembly;GO:0000070//mitotic sister chromatid segregation;GO:0051301//cell division;GO:0051307//meiotic chromosome separation	K06675//structural maintenance of chromosome 4	NP_013187.1//condensin subunit SMC4 [Saccharomyces cerevisiae S288C]
BK006948.2_mrna_5503	942	1198.02	1227.31	0.0348443	0.921295	*	0.83826	GO:0005634//nucleus;GO:0005737//cytoplasm	GO:0016740//transferase activity	GO:0006364//rRNA processing;GO:0030490//maturation of SSU-rRNA	K09140//pre-rRNA-processing protein TSR3	NP_014648.1//Tsr3p [Saccharomyces cerevisiae S288C]
BK006936.2_mrna_166	4146	10446	7609.3	-0.457117	0.26092	*	0.107262	GO:0030479//actin cortical patch;GO:0043332//mating projection tip;GO:0005934//cellular bud tip;GO:0005737//cytoplasm;GO:0005935//cellular bud neck	GO:0043130//ubiquitin binding;GO:0005509//calcium ion binding	GO:0032467//positive regulation of cytokinesis;GO:0032880//regulation of protein localization;GO:0044396//actin cortical patch organization;GO:0006897//endocytosis;GO:0030968//endoplasmic reticulum unfolded protein response	K12472//epidermal growth factor receptor substrate 15	NP_009506.1//Ede1p [Saccharomyces cerevisiae S288C]
BK006949.2_mrna_6237	3198	3205.7	3320.57	0.0507951	0.852862	*	0.720686	GO:0000145//exocyst;GO:0043332//mating projection tip;GO:0000131//incipient cellular bud site;GO:0005934//cellular bud tip;GO:0005886//plasma membrane;GO:0005737//cytoplasm;GO:0005935//cellular bud neck;GO:0005628//prospore membrane	NA	GO:0006612//protein targeting to membrane;GO:0006904//vesicle docking involved in exocytosis;GO:0048309//endoplasmic reticulum inheritance;GO:0048313//Golgi inheritance;GO:0090522//vesicle tethering involved in exocytosis;GO:0006893//Golgi to plasma membrane transport;GO:0006887//exocytosis	K06111//exocyst complex component 4	NP_015380.1//exocyst subunit SEC8 [Saccharomyces cerevisiae S288C]
BK006945.2_mrna_4380	1179	829.289	1072.67	0.371256	0.413747	*	0.211271	GO:0005634//nucleus;GO:0005730//nucleolus;GO:0000785//chromatin	GO:0003755//peptidyl-prolyl cis-trans isomerase activity;GO:0005527//macrolide binding	GO:0000412//histone peptidyl-prolyl isomerization;GO:0006334//nucleosome assembly;GO:0000415//negative regulation of histone H3-K36 methylation	K14826//FK506-binding nuclear protein [EC:5.2.1.8]	NP_013554.3//peptidylprolyl isomerase FPR4 [Saccharomyces cerevisiae S288C]
BK006946.2_mrna_4401	213	353.18	368.323	0.060566	0.895079	*	0.788569	GO:0005759//mitochondrial matrix;GO:0005740//mitochondrial envelope;GO:0019898//extrinsic component of membrane;GO:0005743//mitochondrial inner membrane;GO:0016021//integral component of membrane;GO:0005739//mitochondrion	NA	GO:0033617//mitochondrial respiratory chain complex IV assembly;GO:0070130//negative regulation of mitochondrial translation	K18181//cytochrome c oxidase assembly factor 14	NP_013577.1//Cox14p [Saccharomyces cerevisiae S288C]
BK006941.2_mrna_2341	3714	1652.66	2987.37	0.854083	2.01998e-07	*	1.04802e-08	GO:0005634//nucleus;GO:0005654//nucleoplasm;GO:0030686//90S preribosome;GO:0032040//small-subunit processome;GO:0005730//nucleolus;GO:0032545//CURI complex;GO:0034456//UTP-C complex	GO:0003723//RNA binding	GO:0031167//rRNA methylation;GO:0000462//maturation of SSU-rRNA from tricistronic rRNA transcript (SSU-rRNA, 5.8S rRNA, LSU-rRNA);GO:0006409//tRNA export from nucleus;GO:0006364//rRNA processing	K14544//U3 small nucleolar RNA-associated protein 22	NP_011604.3//rRNA-processing protein UTP22 [Saccharomyces cerevisiae S288C]
BK006937.2_mrna_683	948	3173.88	2347.31	-0.435239	0.00892301	*	0.00123354	GO:0005829//cytosol;GO:0005737//cytoplasm	GO:0017057//6-phosphogluconolactonase activity	GO:0006098//pentose-phosphate shunt;GO:0006409//tRNA export from nucleus;GO:0005975//carbohydrate metabolic process;GO:0009051//pentose-phosphate shunt, oxidative branch	K01057//6-phosphogluconolactonase [EC:3.1.1.31]	NP_009999.2//Sol2p [Saccharomyces cerevisiae S288C]
BK006939.2_mrna_1648	381	38.375	42.7941	0.157245	0.822464	*	0.664303	GO:0005783//endoplasmic reticulum;GO:0005794//Golgi apparatus;GO:0016021//integral component of membrane;GO:0005789//endoplasmic reticulum membrane;GO:0005739//mitochondrion;GO:0000139//Golgi membrane;GO:0030659//cytoplasmic vesicle membrane	GO:0005458//GDP-mannose transmembrane transporter activity;GO:0015297//antiporter activity;GO:0022857//transmembrane transporter activity	GO:0055085//transmembrane transport;GO:0008643//carbohydrate transport	K15356//GDP-mannose transporter	NP_001288277.1//Fmp49p [Saccharomyces cerevisiae S288C]
BK006945.2_mrna_4364	1572	657.822	970.001	0.56029	0.119059	*	0.0348579	GO:0005737//cytoplasm	GO:0046872//metal ion binding;GO:0000166//nucleotide binding;GO:0003938//IMP dehydrogenase activity	GO:0006177//GMP biosynthetic process	K00088//IMP dehydrogenase [EC:1.1.1.205]	XP_018220815.1//IMD3-like protein [Saccharomyces eubayanus]
BK006948.2_mrna_5861	1572	819.038	916.7	0.162519	0.754201	*	0.566608	GO:0005634//nucleus;GO:0005829//cytosol;GO:0000932//P-body	GO:0003723//RNA binding;GO:0003729//mRNA binding;GO:0070336//flap-structured DNA binding;GO:0000166//nucleotide binding;GO:0030371//translation repressor activity	GO:0017148//negative regulation of translation;GO:0000289//nuclear-transcribed mRNA poly(A) tail shortening;GO:0032079//positive regulation of endodeoxyribonuclease activity;GO:0043488//regulation of mRNA stability;GO:0015031//protein transport;GO:0000956//nuclear-transcribed mRNA catabolic process	K19816//transcription activator MSS11	NP_015004.3//Vts1p [Saccharomyces cerevisiae S288C]
BK006938.2_mrna_820	672	951.733	762.65	-0.319537	0.191517	*	0.067696	GO:0005634//nucleus;GO:0000780//condensed nuclear chromosome, centromeric region;GO:0005737//cytoplasm	GO:0042393//histone binding;GO:0046982//protein heterodimerization activity;GO:0097030//CENP-A containing nucleosome binding	GO:0071459//protein localization to chromosome, centromeric region;GO:0007059//chromosome segregation;GO:2000059//negative regulation of ubiquitin-dependent protein catabolic process;GO:0000086//G2/M transition of mitotic cell cycle;GO:0051382//kinetochore assembly	NA	CAA65620.1//D2155 [Saccharomyces cerevisiae]
BK006938.2_mrna_1237	1920	2691.52	3797.23	0.496526	0.00671904	*	0.000873756	GO:0005737//cytoplasm	GO:0043022//ribosome binding;GO:0046872//metal ion binding;GO:0016874//ligase activity;GO:0004842//ubiquitin-protein transferase activity;GO:0003676//nucleic acid binding	GO:0016574//histone ubiquitination;GO:0036205//histone catabolic process	K22381//E3 ubiquitin-protein ligase ZNF598 [EC:2.3.2.27]	NP_010552.3//E3 ubiquitin-protein ligase HEL2 [Saccharomyces cerevisiae S288C]
BK006941.2_mrna_2508	2964	13419.2	11552.2	-0.216132	0.591098	*	0.377412	GO:0005739//mitochondrion;GO:0005741//mitochondrial outer membrane;GO:0005945//6-phosphofructokinase complex;GO:0005737//cytoplasm	GO:0046872//metal ion binding;GO:0003872//6-phosphofructokinase activity;GO:0005524//ATP binding;GO:0048029//monosaccharide binding;GO:0016208//AMP binding;GO:0046961//proton-transporting ATPase activity, rotational mechanism;GO:0070095//fructose-6-phosphate binding	GO:0061621//canonical glycolysis;GO:1902600//proton transmembrane transport;GO:0006007//glucose catabolic process;GO:0006002//fructose 6-phosphate metabolic process;GO:0006096//glycolytic process;GO:0051453//regulation of intracellular pH;GO:0030388//fructose 1,6-bisphosphate metabolic process	K00850//6-phosphofructokinase 1 [EC:2.7.1.11]	NP_011756.1//6-phosphofructokinase subunit alpha [Saccharomyces cerevisiae S288C]
BK006949.2_ncrna_6271	164	14.407	9.47251	-0.604955	0.413954	*	0.211536	NA	NA	NA	NA	NA
BK006946.2_mrna_4799	3090	2465.31	3279	0.41149	0.0709066	*	0.0171125	GO:0005768//endosome;GO:0000329//fungal-type vacuole membrane;GO:0030897//HOPS complex;GO:0005829//cytosol;GO:0033263//CORVET complex	GO:0046872//metal ion binding;GO:0030674//protein binding, bridging;GO:0016740//transferase activity;GO:0004842//ubiquitin-protein transferase activity	GO:0006895//Golgi to endosome transport;GO:0006904//vesicle docking involved in exocytosis;GO:0042144//vacuole fusion, non-autophagic;GO:0045324//late endosome to vacuole transport;GO:0006886//intracellular protein transport;GO:0016574//histone ubiquitination;GO:0099022//vesicle tethering;GO:0007033//vacuole organization;GO:0007032//endosome organization;GO:0035542//regulation of SNARE complex as…	K20179//vacuolar protein sorting-associated protein 11	NP_013958.1//tethering complex subunit PEP5 [Saccharomyces cerevisiae S288C]
BK006945.2_mrna_4244	2367	2631.46	1988.99	-0.403822	0.0216787	*	0.00370119	GO:0005816//spindle pole body;GO:0000133//polarisome;GO:0043332//mating projection tip;GO:0000131//incipient cellular bud site;GO:0005934//cellular bud tip;GO:0005935//cellular bud neck;GO:0005628//prospore membrane	GO:0005519//cytoskeletal regulatory protein binding;GO:0003779//actin binding;GO:0008047//enzyme activator activity	GO:0007124//pseudohyphal growth;GO:0090338//positive regulation of formin-nucleated actin cable assembly;GO:0007121//bipolar cellular bud site selection;GO:0034652//extrachromosomal circular DNA localization involved in cell aging;GO:0051125//regulation of actin nucleation;GO:0007118//budding cell apical bud growth;GO:0030010//establishment of cell polarity;GO:0032880//regulation of protein local…	NA	NP_013423.1//Bud6p [Saccharomyces cerevisiae S288C]
BK006944.2_mrna_3529	921	506.345	1128.23	1.15586	3.33955e-11	Up	1.22963e-12	GO:0005634//nucleus;GO:0005737//cytoplasm	NA	NA	NA	NP_012738.1//Lot5p [Saccharomyces cerevisiae S288C]
BK006940.2_ncrna_1946	254	19.1519	11.7109	-0.709633	0.266813	*	0.110833	NA	NA	NA	NA	NA
BK006941.2_mrna_2465	2454	4178.28	5170.11	0.307287	0.0755232	*	0.0187196	GO:0005768//endosome;GO:0005634//nucleus;GO:0030479//actin cortical patch;GO:0005829//cytosol;GO:0005886//plasma membrane;GO:0005737//cytoplasm	GO:0043022//ribosome binding	GO:0006623//protein targeting to vacuole;GO:0072659//protein localization to plasma membrane;GO:0006898//receptor-mediated endocytosis;GO:0019236//response to pheromone	K21845//cargo-transport protein YPP1	NP_011714.3//Ypp1p [Saccharomyces cerevisiae S288C]
BK006948.2_mrna_5658	957	2054.11	2209.67	0.105319	0.702321	*	0.503085	GO:0005840//ribosome;GO:0005763//mitochondrial small ribosomal subunit;GO:0005739//mitochondrion	GO:0003735//structural constituent of ribosome	GO:0032543//mitochondrial translation	NA	NP_014801.1//mitochondrial 37S ribosomal protein PET123 [Saccharomyces cerevisiae S288C]
BK006946.2_mrna_4576	1101	2918.07	2724.76	-0.0988835	0.699111	*	0.499679	GO:0019898//extrinsic component of membrane;GO:0005829//cytosol	GO:0051721//protein phosphatase 2A binding	GO:0031929//TOR signaling;GO:0009968//negative regulation of signal transduction;GO:0009966//regulation of signal transduction;GO:0045943//positive regulation of transcription by RNA polymerase I	K17606//immunoglobulin-binding protein 1	NP_013741.1//Tap42p [Saccharomyces cerevisiae S288C]
BK006948.2_mrna_5599	3231	1966.23	1881.99	-0.0631713	0.899683	*	0.796094	GO:0005643//nuclear pore;GO:0031965//nuclear membrane;GO:0044615//nuclear pore nuclear basket;GO:0016021//integral component of membrane;GO:0044613//nuclear pore central transport channel	GO:0017056//structural constituent of nuclear pore;GO:0008139//nuclear localization sequence binding	GO:0000055//ribosomal large subunit export from nucleus;GO:0016973//poly(A)+ mRNA export from nucleus;GO:0006607//NLS-bearing protein import into nucleus;GO:0000972//transcription-dependent tethering of RNA polymerase II gene DNA at nuclear periphery;GO:0006606//protein import into nucleus	K18721//nucleoporin NUP1	NP_014741.1//FG-nucleoporin NUP1 [Saccharomyces cerevisiae S288C]
BK006945.2_mrna_4226	363	5.34895	7.1968	0.428099	0.613152	*	0.400201	GO:0016021//integral component of membrane	NA	NA	NA	NP_001335800.1//hypothetical protein YLR302C [Saccharomyces cerevisiae S288C]
BK006942.2_mrna_3020	1041	2690.91	3612.94	0.425078	0.0192093	*	0.00316029	GO:0005783//endoplasmic reticulum;GO:0016021//integral component of membrane;GO:0005789//endoplasmic reticulum membrane	GO:0046873//metal ion transmembrane transporter activity;GO:0005385//zinc ion transmembrane transporter activity	GO:0006882//cellular zinc ion homeostasis;GO:0006829//zinc ion transport;GO:0071577//zinc ion transmembrane transport	K14713//solute carrier family 39 (zinc transporter), member 7	NP_012241.1//Zn(2+) transporter YKE4 [Saccharomyces cerevisiae S288C]
BK006936.2_mrna_177	3078	788.303	936.421	0.248407	0.571317	*	0.355029	GO:0030122//AP-2 adaptor complex;GO:0005935//cellular bud neck	GO:0035615//clathrin adaptor activity	GO:0006886//intracellular protein transport;GO:0072583//clathrin-dependent endocytosis	K11824//AP-2 complex subunit alpha	NP_009516.1//Apl3p [Saccharomyces cerevisiae S288C]
BK006949.2_mrna_6188	1728	1852.11	851.421	-1.12123	1.34295e-10	Down	5.23696e-12	GO:0005759//mitochondrial matrix;GO:0005739//mitochondrion	GO:0046872//metal ion binding;GO:0046421//methylisocitrate lyase activity;GO:0004451//isocitrate lyase activity	GO:0019752//carboxylic acid metabolic process;GO:0019629//propionate catabolic process, 2-methylcitrate cycle	K01637//isocitrate lyase [EC:4.1.3.1]	NP_015331.1//methylisocitrate lyase ICL2 [Saccharomyces cerevisiae S288C]
BK006948.2_mrna_5527	1770	5026.94	4544.53	-0.145548	0.781694	*	0.605804	GO:0005737//cytoplasm	GO:0003729//mRNA binding;GO:0051879//Hsp90 protein binding;GO:0042030//ATPase inhibitor activity;GO:0030544//Hsp70 protein binding	GO:0006457//protein folding;GO:0006626//protein targeting to mitochondrion;GO:0008104//protein localization	K09553//stress-induced-phosphoprotein 1	NP_014670.1//Hsp90 cochaperone STI1 [Saccharomyces cerevisiae S288C]
BK006939.2_mrna_1618	597	7545.93	5599.06	-0.430514	0.100799	*	0.0277345	GO:0005634//nucleus;GO:0019774//proteasome core complex, beta-subunit complex;GO:0005789//endoplasmic reticulum membrane;GO:0005737//cytoplasm;GO:0034515//proteasome storage granule;GO:0005839//proteasome core complex	GO:0004175//endopeptidase activity;GO:0004298//threonine-type endopeptidase activity;GO:0061133//endopeptidase activator activity	GO:0051603//proteolysis involved in cellular protein catabolic process;GO:0043161//proteasome-mediated ubiquitin-dependent protein catabolic process;GO:0010499//proteasomal ubiquitin-independent protein catabolic process;GO:0010498//proteasomal protein catabolic process	K02734//20S proteasome subunit beta 4 [EC:3.4.25.1]	NP_010928.1//proteasome core particle subunit beta 4 [Saccharomyces cerevisiae S288C]
BK006938.2_mrna_1307	2172	2885.51	3956.28	0.455317	0.0202438	*	0.0033576	GO:1990112//RQC complex;GO:0005737//cytoplasm	NA	GO:1990116//ribosome-associated ubiquitin-dependent protein catabolic process;GO:0072344//rescue of stalled ribosome	NA	EGA87461.1//YDR333C-like protein [Saccharomyces cerevisiae VL3]
BK006939.2_mrna_1531	1848	5583.29	3772.79	-0.565483	0.0175817	*	0.00281896	GO:0097042//extrinsic component of fungal-type vacuolar membrane;GO:0035859//Seh1-associated complex;GO:1990130//GATOR1 complex	NA	GO:0032007//negative regulation of TOR signaling;GO:0034198//cellular response to amino acid starvation;GO:0042493//response to drug;GO:2000785//regulation of autophagosome assembly;GO:1903833//positive regulation of cellular response to amino acid starvation;GO:0015824//proline transport;GO:0010508//positive regulation of autophagy;GO:0006995//cellular response to nitrogen starvation;GO:0015840/…	K20405//nitrogen permease regulator 2-like protein	NP_010852.4//nitrogen permease regulating protein NPR2 [Saccharomyces cerevisiae S288C]
BK006938.2_mrna_1339	1368	1467.13	2295.29	0.645679	0.00439196	*	0.000521436	GO:0005681//spliceosomal complex;GO:0034399//nuclear periphery;GO:0071013//catalytic step 2 spliceosome	GO:0000386//second spliceosomal transesterification activity	GO:0000350//generation of catalytic spliceosome for second transesterification step;GO:0000398//mRNA splicing, via spliceosome;GO:0051301//cell division;GO:0000348//mRNA branch site recognition;GO:0000389//mRNA 3'-splice site recognition	K12816//pre-mRNA-processing factor 17	NP_010652.3//Cdc40p [Saccharomyces cerevisiae S288C]
BK006945.2_mrna_4338	2820	388.872	746.036	0.939948	0.00154269	*	0.000161886	GO:0034388//Pwp2p-containing subcomplex of 90S preribosome;GO:0005634//nucleus;GO:0005654//nucleoplasm;GO:0030686//90S preribosome;GO:0032040//small-subunit processome;GO:0005730//nucleolus	NA	GO:0031167//rRNA methylation;GO:0042274//ribosomal small subunit biogenesis;GO:0006364//rRNA processing	K14554//U3 small nucleolar RNA-associated protein 21	NP_013513.3//rRNA-processing protein UTP21 [Saccharomyces cerevisiae S288C]
BK006938.2_mrna_1235	2295	10228.8	9290.58	-0.138803	0.619493	*	0.406399	GO:0016020//membrane;GO:0031901//early endosome membrane;GO:0005794//Golgi apparatus;GO:0016021//integral component of membrane;GO:0000139//Golgi membrane	GO:0031683//G-protein beta/gamma-subunit complex binding;GO:0016409//palmitoyltransferase activity;GO:0019706//protein-cysteine S-palmitoyltransferase activity	GO:0018345//protein palmitoylation;GO:0006612//protein targeting to membrane;GO:0030100//regulation of endocytosis;GO:0090029//negative regulation of pheromone-dependent signal transduction involved in conjugation with cellular fusion	K20032//palmitoyltransferase ZDHHC13/17 [EC:2.3.1.225]	NP_010550.1//palmitoyltransferase AKR1 [Saccharomyces cerevisiae S288C]
BK006945.2_mrna_4192	1713	1594.68	2989.71	0.906739	0.0137398	*	0.00206039	NA	NA	NA	NA	NP_013369.1//Bop2p [Saccharomyces cerevisiae S288C]
BK006947.3_mrna_4923	768	3559.52	2159.53	-0.720966	5.62512e-06	*	3.61514e-07	GO:0005634//nucleus	GO:0043565//sequence-specific DNA binding;GO:0003700//DNA-binding transcription factor activity	GO:0001080//nitrogen catabolite activation of transcription from RNA polymerase II promoter;GO:0000256//allantoin catabolic process	NA	NP_014085.1//Dal82p [Saccharomyces cerevisiae S288C]
BK006947.3_mrna_4945	1023	1764.58	2162.82	0.293588	0.135716	*	0.041911	GO:0005634//nucleus;GO:0005663//DNA replication factor C complex;GO:0031390//Ctf18 RFC-like complex;GO:0031391//Elg1 RFC-like complex;GO:0005829//cytosol;GO:0031389//Rad17 RFC-like complex	GO:0003677//DNA binding;GO:0003689//DNA clamp loader activity;GO:0005524//ATP binding;GO:0016887//ATPase activity	GO:0006272//leading strand elongation;GO:0006260//DNA replication;GO:0007062//sister chromatid cohesion;GO:0006298//mismatch repair;GO:0006261//DNA-dependent DNA replication;GO:0070914//UV-damage excision repair	K10756//replication factor C subunit 3/5	NP_014109.1//replication factor C subunit 3 [Saccharomyces cerevisiae S288C]
BK006938.2_mrna_1271	660	1375.59	1588.15	0.207299	0.409074	*	0.207584	GO:0005783//endoplasmic reticulum;GO:0016021//integral component of membrane;GO:0005789//endoplasmic reticulum membrane	GO:0051377//mannose-ethanolamine phosphotransferase activity	GO:0006506//GPI anchor biosynthetic process	K05287//phosphatidylinositol glycan, class F [EC:2.7.-.-]	NP_010588.1//mannose-ethanolamine phosphotransferase GPI11 [Saccharomyces cerevisiae S288C]
BK006946.2_mrna_4540	231	10.9005	13.0157	0.255867	0.770683	*	0.591941	NA	NA	NA	NA	NP_878140.1//hypothetical protein YMR001C-A [Saccharomyces cerevisiae S288C]
BK006948.2_mrna_5648	558	2033.04	2021.28	-0.00836876	0.978966	*	0.954788	GO:0005681//spliceosomal complex;GO:0005737//cytoplasm	GO:0001671//ATPase activator activity;GO:0003676//nucleic acid binding	GO:0032781//positive regulation of ATPase activity;GO:0000398//mRNA splicing, via spliceosome	NA	NP_014791.1//Spp2p [Saccharomyces cerevisiae S288C]
BK006934.2_mrna_2709	276	33.6749	53.8881	0.678295	0.190087	*	0.0670137	GO:0000794//condensed nuclear chromosome;GO:0032798//Swi5-Sfr1 complex	NA	GO:0007131//reciprocal meiotic recombination;GO:0071479//cellular response to ionizing radiation;GO:0000707//meiotic DNA recombinase assembly;GO:0000730//DNA recombinase assembly	K10991//DNA repair protein Swi5/Sae3	NP_011947.2//Sae3p [Saccharomyces cerevisiae S288C]
BK006948.2_mrna_5755	837	39.534	45.808	0.212504	0.824645	*	0.668968	GO:0031160//spore wall;GO:0005628//prospore membrane	NA	GO:0030476//ascospore wall assembly;GO:0030437//ascospore formation	NA	NP_014898.3//Osw1p [Saccharomyces cerevisiae S288C]
BK006948.2_mrna_5653	4536	13268.1	15597.3	0.233334	0.3742	*	0.182188	GO:0016021//integral component of membrane	GO:0005524//ATP binding;GO:0042626//ATPase activity, coupled to transmembrane movement of substances	GO:0046618//drug export	K08711//ATP-binding cassette, subfamily G (WHITE), member 2, PDR	CAY86440.1//Pdr5p [Saccharomyces cerevisiae EC1118]
BK006948.2_mrna_5575	1773	1277.55	1743.56	0.448652	0.0656293	*	0.0154764	GO:0000922//spindle pole;GO:0005634//nucleus;GO:0000778//condensed nuclear chromosome kinetochore;GO:0000780//condensed nuclear chromosome, centromeric region;GO:0005737//cytoplasm	NA	GO:0045144//meiotic sister chromatid segregation;GO:0045184//establishment of protein localization;GO:0034096//positive regulation of maintenance of meiotic sister chromatid cohesion;GO:0007094//mitotic spindle assembly checkpoint;GO:0031134//sister chromatid biorientation;GO:0070199//establishment of protein localization to chromosome;GO:0034508//centromere complex assembly;GO:0000070//mitotic s…	K11582//shugoshin	NP_014716.1//Sgo1p [Saccharomyces cerevisiae S288C]
BK006938.2_mrna_1408	1245	5645.07	3904.67	-0.531792	0.209484	*	0.0774828	GO:0010494//cytoplasmic stress granule;GO:0005634//nucleus;GO:0005730//nucleolus;GO:0005737//cytoplasm	GO:0008143//poly(A) binding;GO:0003723//RNA binding;GO:0003729//mRNA binding;GO:0042802//identical protein binding;GO:0000993//RNA polymerase II complex binding;GO:0031370//eukaryotic initiation factor 4G binding	GO:0006406//mRNA export from nucleus;GO:0032968//positive regulation of transcription elongation from RNA polymerase II promoter;GO:0017148//negative regulation of translation;GO:0000398//mRNA splicing, via spliceosome;GO:0006415//translational termination;GO:0006364//rRNA processing;GO:2000805//negative regulation of termination of RNA polymerase II transcription, poly(A)-coupled	K14651//transcription initiation factor TFIID subunit 15	NP_010720.3//mRNA-binding protein NPL3 [Saccharomyces cerevisiae S288C]
BK006938.2_mrna_1391	708	827.05	734.829	-0.170566	0.653676	*	0.444445	GO:0005730//nucleolus;GO:0005737//cytoplasm	GO:0003697//single-stranded DNA binding;GO:0019843//rRNA binding	GO:0007000//nucleolus organization;GO:0030307//positive regulation of cell growth;GO:0043066//negative regulation of apoptotic process;GO:0006364//rRNA processing;GO:0008284//positive regulation of cell proliferation	K14851//ribosomal RNA-processing protein 17	NP_010700.3//Rrp17p [Saccharomyces cerevisiae S288C]
BK006949.2_mrna_6245	420	165.712	86.753	-0.933688	0.0191107	*	0.00313851	GO:0016021//integral component of membrane	NA	NA	NA	CAY87020.1//EC1118_1P2_3851p [Saccharomyces cerevisiae EC1118]
BK006938.2_mrna_1493	1509	313.061	288.81	-0.116326	0.839613	*	0.702324	GO:0009277//fungal-type cell wall;GO:0005886//plasma membrane;GO:0031225//anchored component of membrane	NA	GO:0030476//ascospore wall assembly;GO:0030437//ascospore formation;GO:0031505//fungal-type cell wall organization	NA	NP_010810.1//Sps2p [Saccharomyces cerevisiae S288C]
BK006947.3_mrna_5081	390	1460.8	1593.82	0.125734	0.758434	*	0.572601	GO:0031965//nuclear membrane;GO:0005783//endoplasmic reticulum;GO:0005635//nuclear envelope;GO:0016021//integral component of membrane;GO:0005789//endoplasmic reticulum membrane	NA	GO:0015031//protein transport	NA	NP_014250.1//Pga2p [Saccharomyces cerevisiae S288C]
BK006947.3_mrna_5058	1212	390.734	562.953	0.526827	0.170728	*	0.0575189	GO:0005634//nucleus;GO:0030686//90S preribosome;GO:0005730//nucleolus;GO:0030684//preribosome	GO:0003723//RNA binding;GO:0019843//rRNA binding	GO:0042274//ribosomal small subunit biogenesis	K11294//nucleolin	NP_014224.2//Nop13p [Saccharomyces cerevisiae S288C]
BK006939.2_ncrna_1754	186	30.1296	45.6056	0.598028	0.221855	*	0.0843119	NA	NA	NA	NA	NA
BK006938.2_mrna_719	1830	108.894	181.032	0.733314	0.0883763	*	0.0232663	GO:0000324//fungal-type vacuole;GO:0005887//integral component of plasma membrane;GO:0016021//integral component of membrane;GO:0071944//cell periphery;GO:0005886//plasma membrane	GO:0015151//alpha-glucoside transmembrane transporter activity;GO:0015144//carbohydrate transmembrane transporter activity;GO:0005351//carbohydrate:proton symporter activity;GO:0005363//maltose transmembrane transporter activity;GO:0022857//transmembrane transporter activity	GO:0055085//transmembrane transport;GO:0008643//carbohydrate transport;GO:0000023//maltose metabolic process;GO:0000017//alpha-glucoside transport	K08141//MFS transporter, SP family, general alpha glucoside:H+ symporter	NP_010034.1//alpha-glucoside permease [Saccharomyces cerevisiae S288C]
BK006949.2_mrna_6100	1404	1773.81	1868.96	0.0753839	0.826762	*	0.673187	GO:0000214//tRNA-intron endonuclease complex;GO:0012505//endomembrane system;GO:0005739//mitochondrion;GO:0005741//mitochondrial outer membrane	NA	GO:0000379//tRNA-type intron splice site recognition and cleavage;GO:0090502//RNA phosphodiester bond hydrolysis, endonucleolytic	K15326//tRNA-splicing endonuclease subunit Sen54	NP_015242.1//tRNA splicing endonuclease subunit SEN54 [Saccharomyces cerevisiae S288C]
BK006941.2_mrna_2086	1131	2221.91	3112.87	0.486441	0.0162857	*	0.0025403	GO:0005953//CAAX-protein geranylgeranyltransferase complex	GO:0004662//CAAX-protein geranylgeranyltransferase activity;GO:0008270//zinc ion binding;GO:0003824//catalytic activity;GO:0016740//transferase activity	GO:0030010//establishment of cell polarity;GO:0018342//protein prenylation;GO:0007264//small GTPase mediated signal transduction;GO:0018344//protein geranylgeranylation;GO:0006874//cellular calcium ion homeostasis	K11713//geranylgeranyl transferase type-1 subunit beta [EC:2.5.1.59]	NP_011360.1//protein geranylgeranyltransferase type I subunit CDC43 [Saccharomyces cerevisiae S288C]
BK006946.2_mrna_4609	930	938.62	1153	0.296784	0.373796	*	0.181674	GO:0005743//mitochondrial inner membrane;GO:0016021//integral component of membrane	GO:0005471//ATP:ADP antiporter activity;GO:0022857//transmembrane transporter activity	GO:0140021//mitochondrial ADP transmembrane transport;GO:1990544//mitochondrial ATP transmembrane transport;GO:0015886//heme transport;GO:0009060//aerobic respiration;GO:0006839//mitochondrial transport;GO:0006783//heme biosynthetic process	K05863//solute carrier family 25 (mitochondrial adenine nucleotide translocator), member 4/5/6/31	EHN00890.1//Aac1p [Saccharomyces cerevisiae x Saccharomyces kudriavzevii VIN7]
BK006943.2_mrna_3249	504	1668.45	2320.74	0.476078	0.00987212	*	0.00139614	GO:0008623//CHRAC;GO:0005634//nucleus;GO:0000781//chromosome, telomeric region	GO:0046982//protein heterodimerization activity	GO:0070868//heterochromatin organization involved in chromatin silencing;GO:0006348//chromatin silencing at telomere	K03506//DNA polymerase epsilon subunit 4 [EC:2.7.7.7]	NP_012470.1//Dls1p [Saccharomyces cerevisiae S288C]
BK006949.2_mrna_6116	1440	3992.61	4479.68	0.166063	0.603003	*	0.390362	GO:0000935//division septum;GO:0005737//cytoplasm;GO:0005935//cellular bud neck;GO:0032153//cell division site	NA	GO:0097271//protein localization to bud neck;GO:0000917//division septum assembly	NA	NP_015259.1//Rgl1p [Saccharomyces cerevisiae S288C]
BK006948.2_mrna_5686	663	3646.16	3140.11	-0.215563	0.486727	*	0.273708	GO:0005634//nucleus;GO:0016021//integral component of membrane;GO:0005737//cytoplasm	GO:0005525//GTP binding;GO:0003924//GTPase activity	GO:0006997//nucleus organization;GO:0006913//nucleocytoplasmic transport;GO:0006606//protein import into nucleus;GO:0015031//protein transport	K07936//GTP-binding nuclear protein Ran	NP_014828.1//Ran GTPase GSP2 [Saccharomyces cerevisiae S288C]
BK006937.2_mrna_555	966	1943.28	2126.09	0.12971	0.764169	*	0.580568	GO:0005634//nucleus;GO:0005737//cytoplasm	GO:0005524//ATP binding;GO:0004780//sulfate adenylyltransferase (ADP) activity;GO:0003877//ATP adenylyltransferase activity;GO:0008796//bis(5'-nucleosyl)-tetraphosphatase activity	GO:0009165//nucleotide biosynthetic process;GO:0009164//nucleoside catabolic process;GO:0090305//nucleic acid phosphodiester bond hydrolysis;GO:0006259//DNA metabolic process;GO:0009117//nucleotide metabolic process	K00988//sulfate adenylyltransferase (ADP) / ATP adenylyltransferase [EC:2.7.7.5 2.7.7.53]	NP_009880.2//bifunctional AP-4-A phosphorylase/ADP sulfurylase [Saccharomyces cerevisiae S288C]
BK006937.2_mrna_534	441	0.35418	0.317922	-0.155809	0.694339	*	0.492836	GO:0000943//retrotransposon nucleocapsid	GO:0003964//RNA-directed DNA polymerase activity;GO:0003723//RNA binding;GO:0003887//DNA-directed DNA polymerase activity;GO:0008233//peptidase activity;GO:0004540//ribonuclease activity;GO:0003676//nucleic acid binding	GO:0015074//DNA integration;GO:0032197//transposition, RNA-mediated	NA	P25601.1//PUTATIVE PSEUDOGENE: RecName: Full=Putative transposon Ty5-1 protein YCL075W
BK006945.2_mrna_3926	2088	1788.25	2062.43	0.205798	0.424899	*	0.220067	GO:0032390//MutLbeta complex;GO:0032389//MutLalpha complex;GO:0005634//nucleus;GO:0032300//mismatch repair complex	GO:0000405//bubble DNA binding;GO:0005524//ATP binding;GO:0000404//heteroduplex DNA loop binding;GO:0030983//mismatched DNA binding;GO:0016887//ATPase activity	GO:0007131//reciprocal meiotic recombination;GO:0006298//mismatch repair	K08734//DNA mismatch repair protein MLH1;K10858//DNA mismatch repair protein PMS2	NP_013135.1//mismatch repair protein MLH2 [Saccharomyces cerevisiae S288C]
BK006945.2_mrna_3989	1185	1682.15	1049.15	-0.681085	0.00216703	*	0.00023792	GO:0005743//mitochondrial inner membrane	GO:0052689//carboxylic ester hydrolase activity;GO:0003841//1-acylglycerol-3-phosphate O-acyltransferase activity;GO:0004623//phospholipase A2 activity;GO:0042171//lysophosphatidic acid acyltransferase activity	GO:0055088//lipid homeostasis;GO:0006654//phosphatidic acid biosynthetic process;GO:0035965//cardiolipin acyl-chain remodeling	K13699//abhydrolase domain-containing protein 5 [EC:2.3.1.51];K13535//cardiolipin-specific phospholipase [EC:3.1.1.-]	NP_013200.1//lysophosphatidic acid acyltransferase ICT1 [Saccharomyces cerevisiae S288C]
BK006938.2_mrna_1200	1635	2965.63	3670.03	0.307453	0.280235	*	0.119458	GO:0005685//U1 snRNP;GO:0071004//U2-type prespliceosome;GO:0000243//commitment complex	GO:0003723//RNA binding	GO:0006396//RNA processing;GO:0000398//mRNA splicing, via spliceosome;GO:0000395//mRNA 5'-splice site recognition	K13217//pre-mRNA-processing factor 39	NP_010521.1//mRNA splicing protein PRP42 [Saccharomyces cerevisiae S288C]
BK006938.2_mrna_887	2955	3556.09	4318.89	0.280366	0.155999	*	0.0503895	NA	GO:0005078//MAP-kinase scaffold activity	GO:0043407//negative regulation of MAP kinase activity;GO:0007232//osmosensory signaling pathway via Sho1 osmosensor	NA	NP_010210.1//Ahk1p [Saccharomyces cerevisiae S288C]
BK006939.2_mrna_1673	390	4924.44	3571.51	-0.463424	0.0264454	*	0.00471812	GO:0005634//nucleus;GO:0005829//cytosol;GO:0005758//mitochondrial intermembrane space;GO:0005737//cytoplasm	GO:0019239//deaminase activity	GO:1901565//organonitrogen compound catabolic process	K06965//protein pelota;K09022//2-iminobutanoate/2-iminopropanoate deaminase [EC:3.5.99.10]	NP_010978.3//putative isoleucine biosynthesis protein HMF1 [Saccharomyces cerevisiae S288C]
BK006938.2_mrna_1089	975	1751.39	1210.43	-0.532983	0.176525	*	0.0601217	NA	NA	NA	NA	NP_010409.3//hypothetical protein YDR124W [Saccharomyces cerevisiae S288C]
BK006936.2_mrna_506	5751	2352.18	1916.67	-0.295395	0.424899	*	0.220449	GO:0005634//nucleus;GO:0000784//nuclear chromosome, telomeric region;GO:0070187//shelterin complex	GO:0042162//telomeric DNA binding	GO:0016233//telomere capping;GO:0000729//DNA double-strand break processing;GO:0070198//protein localization to chromosome, telomeric region;GO:0030466//chromatin silencing at silent mating-type cassette;GO:0006270//DNA replication initiation;GO:0007049//cell cycle;GO:0000723//telomere maintenance	K11118//RAP1-interacting factor 1	NP_009834.4//DNA-binding protein RIF1 [Saccharomyces cerevisiae S288C]
BK006936.2_mrna_243	534	1504.89	1220.13	-0.302616	0.269121	*	0.112199	NA	GO:0004721//phosphoprotein phosphatase activity;GO:0047407//ADP-ribosyl-[dinitrogen reductase] hydrolase activity;GO:0016791//phosphatase activity	GO:0006388//tRNA splicing, via endonucleolytic cleavage and ligation	K15529//ADP-ribose 1''-phosphate phosphatase [EC:3.1.3.84]	NP_009578.1//ADP-ribose 1''-phosphate phosphatase [Saccharomyces cerevisiae S288C]
BK006948.2_mrna_5534	2250	1190.53	1121.78	-0.0858158	0.836714	*	0.696361	GO:0000329//fungal-type vacuole membrane;GO:0000324//fungal-type vacuole;GO:0005794//Golgi apparatus;GO:0016021//integral component of membrane	GO:0016409//palmitoyltransferase activity;GO:0019706//protein-cysteine S-palmitoyltransferase activity	GO:0018345//protein palmitoylation	K20032//palmitoyltransferase ZDHHC13/17 [EC:2.3.1.225]	NP_014677.1//putative palmitoyltransferase AKR2 [Saccharomyces cerevisiae S288C]
BK006940.2_mrna_1940	1656	3953.16	4116.27	0.0583284	0.862102	*	0.735132	GO:0072686//mitotic spindle;GO:0000922//spindle pole;GO:0005634//nucleus;GO:0044732//mitotic spindle pole body;GO:0005816//spindle pole body;GO:1990023//mitotic spindle midzone;GO:0005737//cytoplasm;GO:0005935//cellular bud neck;GO:0030869//RENT complex;GO:0005730//nucleolus	GO:0008138//protein tyrosine/serine/threonine phosphatase activity;GO:0004721//phosphoprotein phosphatase activity;GO:0004725//protein tyrosine phosphatase activity;GO:0004722//protein serine/threonine phosphatase activity	GO:0032467//positive regulation of cytokinesis;GO:0071850//mitotic cell cycle arrest;GO:0000278//mitotic cell cycle;GO:0000226//microtubule cytoskeleton organization;GO:0051229//meiotic spindle disassembly;GO:0007059//chromosome segregation;GO:0000422//autophagy of mitochondrion;GO:0071470//cellular response to osmotic stress;GO:0051301//cell division;GO:0007096//regulation of exit from mitosis;G…	K06639//cell division cycle 14 [EC:3.1.3.16 3.1.3.48]	NP_116684.3//phosphoprotein phosphatase CDC14 [Saccharomyces cerevisiae S288C]
BK006940.2_mrna_1915	2259	3929.53	4946.28	0.331984	0.0645473	*	0.015124	NA	NA	NA	K06158//ATP-binding cassette, subfamily F, member 3;K10472	AJU35630.1//Gcn20p [Saccharomyces cerevisiae YJM244]
BK006937.2_mrna_633	1836	5985.78	6943.01	0.214022	0.312228	*	0.139314	GO:0000329//fungal-type vacuole membrane;GO:0016021//integral component of membrane	NA	GO:0055085//transmembrane transport	NA	NP_009952.2//hypothetical protein YCR023C [Saccharomyces cerevisiae S288C]
BK006934.2_mrna_2802	1881	2062.5	2802.98	0.442565	0.0369262	*	0.00737467	GO:0000777//condensed chromosome kinetochore;GO:0005680//anaphase-promoting complex	GO:0061630//ubiquitin protein ligase activity;GO:0030332//cyclin binding	GO:0045842//positive regulation of mitotic metaphase/anaphase transition;GO:0051301//cell division;GO:0031145//anaphase-promoting complex-dependent catabolic process;GO:0016567//protein ubiquitination;GO:0030071//regulation of mitotic metaphase/anaphase transition;GO:0007049//cell cycle	K03355//anaphase-promoting complex subunit 8	NP_012036.1//anaphase promoting complex subunit CDC23 [Saccharomyces cerevisiae S288C]
BK006945.2_mrna_4018	2562	2457.79	2383.37	-0.0443575	0.904774	*	0.805438	GO:0005737//cytoplasm;GO:0005680//anaphase-promoting complex	GO:0061630//ubiquitin protein ligase activity;GO:0031625//ubiquitin protein ligase binding	GO:0006511//ubiquitin-dependent protein catabolic process;GO:0010458//exit from mitosis;GO:0051301//cell division;GO:0031145//anaphase-promoting complex-dependent catabolic process;GO:0016567//protein ubiquitination;GO:0007091//metaphase/anaphase transition of mitotic cell cycle	K03349//anaphase-promoting complex subunit 2	NP_013228.1//anaphase promoting complex subunit 2 [Saccharomyces cerevisiae S288C]
BK006947.3_mrna_4930	1128	4424.38	4046.71	-0.128725	0.583029	*	0.36582	NA	GO:0004712//protein serine/threonine/tyrosine kinase activity;GO:0004674//protein serine/threonine kinase activity;GO:0005524//ATP binding;GO:0004672//protein kinase activity;GO:0004857//enzyme inhibitor activity;GO:0030332//cyclin binding	GO:0030437//ascospore formation;GO:0044257//cellular protein catabolic process;GO:0006468//protein phosphorylation;GO:0034605//cellular response to heat;GO:0000070//mitotic sister chromatid segregation;GO:0018105//peptidyl-serine phosphorylation;GO:0051321//meiotic cell cycle;GO:0071472//cellular response to salt stress;GO:0006303//double-strand break repair via nonhomologous end joining	K22009//protein kinase MCK1	NP_014092.1//serine/threonine/tyrosine protein kinase MCK1 [Saccharomyces cerevisiae S288C]
BK006946.2_mrna_4494	1524	481.903	689.029	0.515824	0.269121	*	0.112164	GO:0070860//RNA polymerase I core factor complex;GO:0005730//nucleolus	GO:0001164//RNA polymerase I CORE element sequence-specific DNA binding;GO:0017025//TBP-class protein binding	GO:0006361//transcription initiation from RNA polymerase I promoter;GO:0042790//nucleolar large rRNA transcription by RNA polymerase I	K15222//RNA polymerase I-specific transcription initiation factor RRN11	NP_013669.1//Rrn11p [Saccharomyces cerevisiae S288C]
BK006949.2_mrna_6012	459	1788.76	2541.54	0.506744	0.0154359	*	0.00239322	GO:0005768//endosome	GO:0020037//heme binding	GO:0032443//regulation of ergosterol biosynthetic process	K17278//membrane-associated progesterone receptor component	NP_015155.1//Dap1p [Saccharomyces cerevisiae S288C]
BK006944.2_mrna_3746	822	2145.19	3229.01	0.589982	0.0322153	*	0.00606563	GO:0030173//integral component of Golgi membrane;GO:0016021//integral component of membrane;GO:0005789//endoplasmic reticulum membrane	NA	GO:0016192//vesicle-mediated transport	NA	NP_012955.1//Gmh1p [Saccharomyces cerevisiae S288C]
BK006949.2_ncrna_6040	462	11.264	21.336	0.921562	0.150633	*	0.0481522	NA	NA	NA	NA	XP_022675093.1//hypothetical protein KLMA_20782 [Kluyveromyces marxianus DMKU3-1042]
BK006941.2_mrna_2022	1380	4118.35	3828.45	-0.105307	0.814075	*	0.649625	GO:0032865//ERMES complex;GO:0031307//integral component of mitochondrial outer membrane;GO:0005739//mitochondrion;GO:0005741//mitochondrial outer membrane;GO:0005737//cytoplasm	GO:0008289//lipid binding	GO:1990456//mitochondrion-endoplasmic reticulum membrane tethering;GO:0006869//lipid transport;GO:0015914//phospholipid transport;GO:0000002//mitochondrial genome maintenance;GO:0007005//mitochondrion organization	K17775//mitochondrial distribution and morphology protein 34	NP_011296.1//ERMES complex subunit MDM34 [Saccharomyces cerevisiae S288C]
BK006940.2_mrna_1947	870	10.8363	19.2841	0.83154	0.221585	*	0.0841466	GO:0005628//prospore membrane	GO:0003723//RNA binding	NA	K13126//polyadenylate-binding protein	NP_116689.1//Rrt5p [Saccharomyces cerevisiae S288C]
BK006945.2_mrna_4212	1425	1913.34	2119.01	0.147301	0.653663	*	0.444272	GO:0035861//site of double-strand break;GO:0000781//chromosome, telomeric region;GO:0030896//checkpoint clamp complex	GO:0003677//DNA binding	GO:0000722//telomere maintenance via recombination;GO:0000077//DNA damage checkpoint;GO:0044778//meiotic DNA integrity checkpoint;GO:0006348//chromatin silencing at telomere;GO:0006289//nucleotide-excision repair;GO:0033314//mitotic DNA replication checkpoint;GO:0031573//intra-S DNA damage checkpoint;GO:0000724//double-strand break repair via homologous recombination;GO:0000723//telomere maintena…	K02544//G2-specific checkpoint protein	NP_013391.1//Mec3p [Saccharomyces cerevisiae S288C]
BK006948.2_mrna_5380	1029	4206.09	2547.88	-0.72318	0.000167305	*	1.38291e-05	GO:0005794//Golgi apparatus;GO:0016021//integral component of membrane;GO:0000139//Golgi membrane	NA	GO:0006890//retrograde vesicle-mediated transport, Golgi to ER	NA	NP_014534.1//hypothetical protein YOL107W [Saccharomyces cerevisiae S288C]
BK006947.3_mrna_5206	411	19050.4	15733.1	-0.276022	0.239238	*	0.0937333	GO:0043505//CENP-A containing nucleosome;GO:0005634//nucleus;GO:0031298//replication fork protection complex;GO:0000788//nuclear nucleosome;GO:0000786//nucleosome	GO:0003677//DNA binding;GO:0046982//protein heterodimerization activity;GO:0031492//nucleosomal DNA binding	GO:0006333//chromatin assembly or disassembly;GO:0009303//rRNA transcription;GO:0043935//sexual sporulation resulting in formation of a cellular spore;GO:0070911//global genome nucleotide-excision repair	K11253//histone H3	XP_454338.1//uncharacterized protein KLLA0_E08625g [Kluyveromyces lactis]
BK006941.2_mrna_2396	1404	2561.69	2527.4	-0.0194401	0.957028	*	0.909777	GO:0000329//fungal-type vacuole membrane;GO:0005783//endoplasmic reticulum;GO:0016021//integral component of membrane	NA	GO:0006623//protein targeting to vacuole	K16261//yeast amino acid transporter	NP_011657.1//Vps62p [Saccharomyces cerevisiae S288C]
BK006944.2_mrna_3556	735	1177.27	1168.34	-0.0109948	0.978966	*	0.954604	GO:0030176//integral component of endoplasmic reticulum membrane;GO:0005785//signal recognition particle receptor complex	GO:0042802//identical protein binding;GO:0005525//GTP binding;GO:0005047//signal recognition particle binding;GO:0003924//GTPase activity	GO:0006614//SRP-dependent cotranslational protein targeting to membrane;GO:0045047//protein targeting to ER	K12272//signal recognition particle receptor subunit beta	NP_012768.1//Signal recognition particle receptor subunit beta [Saccharomyces cerevisiae S288C]
BK006947.3_mrna_5275	462	1441.33	1690.5	0.230043	0.331238	*	0.151843	GO:0005763//mitochondrial small ribosomal subunit;GO:0005739//mitochondrion;GO:0015935//small ribosomal subunit	GO:0043022//ribosome binding;GO:0003735//structural constituent of ribosome	GO:0032543//mitochondrial translation;GO:0006412//translation	K02950//small subunit ribosomal protein S12	NP_014434.1//putative mitochondrial 37S ribosomal protein MRPS12 [Saccharomyces cerevisiae S288C]
BK006945.2_mrna_4172	705	5488.08	7146.47	0.380929	0.174968	*	0.0595038	GO:0000324//fungal-type vacuole;GO:0005737//cytoplasm	GO:0005509//calcium ion binding	NA	NA	NP_013351.1//Ssp120p [Saccharomyces cerevisiae S288C]
BK006934.2_mrna_2740	639	5809.68	5719.9	-0.0224693	0.941395	*	0.877882	GO:0030134//COPII-coated ER to Golgi transport vesicle;GO:0005783//endoplasmic reticulum;GO:0005794//Golgi apparatus;GO:0016021//integral component of membrane;GO:0005793//endoplasmic reticulum-Golgi intermediate compartment;GO:0005789//endoplasmic reticulum membrane	NA	GO:0006886//intracellular protein transport;GO:0007030//Golgi organization;GO:0006888//ER to Golgi vesicle-mediated transport;GO:0016192//vesicle-mediated transport	K20346//p24 family protein alpha	NP_011978.1//Erp5p [Saccharomyces cerevisiae S288C]
BK006947.3_mrna_5041	1677	2460.83	2414.35	-0.0275099	0.945899	*	0.888545	NA	NA	NA	NA	NP_014206.2//hypothetical protein YNL193W [Saccharomyces cerevisiae S288C]
BK006942.2_mrna_2913	7131	4834.29	3827.7	-0.336825	0.414092	*	0.211825	GO:0005938//cell cortex;GO:0043332//mating projection tip;GO:0000131//incipient cellular bud site;GO:0005739//mitochondrion;GO:0005933//cellular bud	NA	GO:0000902//cell morphogenesis;GO:0007118//budding cell apical bud growth;GO:0007114//cell budding	NA	NP_012137.3//Tao3p [Saccharomyces cerevisiae S288C]
BK006939.2_mrna_1778	282	610.147	811.836	0.412031	0.138886	*	0.0434671	GO:0005681//spliceosomal complex;GO:0005730//nucleolus;GO:1990726//Lsm1-7-Pat1 complex;GO:0005688//U6 snRNP;GO:0005732//small nucleolar ribonucleoprotein complex;GO:0046540//U4/U6 x U5 tri-snRNP complex	GO:0003723//RNA binding;GO:0008266//poly(U) RNA binding	GO:0006397//mRNA processing;GO:0000398//mRNA splicing, via spliceosome;GO:0008380//RNA splicing;GO:0006364//rRNA processing;GO:0008033//tRNA processing;GO:0000956//nuclear-transcribed mRNA catabolic process	K12624//U6 snRNA-associated Sm-like protein LSm5	NP_011073.1//RNA-binding protein LSM5 [Saccharomyces cerevisiae S288C]
BK006945.2_mrna_4281	1812	2232.32	1716.83	-0.378798	0.167816	*	0.0561727	GO:0016021//integral component of membrane;GO:0000131//incipient cellular bud site;GO:0005934//cellular bud tip;GO:0005886//plasma membrane	NA	GO:0007124//pseudohyphal growth;GO:0000282//cellular bud site selection	K01183//chitinase [EC:3.2.1.14]	NP_013457.1//Bud8p [Saccharomyces cerevisiae S288C]
BK006945.2_mrna_4142	2454	368.672	684.536	0.892788	0.0149134	*	0.00229088	GO:0034388//Pwp2p-containing subcomplex of 90S preribosome;GO:0005654//nucleoplasm;GO:0030686//90S preribosome;GO:0032040//small-subunit processome;GO:0005730//nucleolus	GO:0030515//snoRNA binding	GO:0031167//rRNA methylation;GO:0000462//maturation of SSU-rRNA from tricistronic rRNA transcript (SSU-rRNA, 5.8S rRNA, LSU-rRNA);GO:0000472//endonucleolytic cleavage to generate mature 5'-end of SSU-rRNA from (SSU-rRNA, 5.8S rRNA, LSU-rRNA);GO:0000447//endonucleolytic cleavage in ITS1 to separate SSU-rRNA from 5.8S rRNA and LSU-rRNA from tricistronic rRNA transcript (SSU-rRNA, 5.8S rRNA, LSU-rRN…	K14555//U3 small nucleolar RNA-associated protein 13	NP_013323.1//Utp13p [Saccharomyces cerevisiae S288C]
BK006948.2_mrna_5568	2028	4190.07	4198.97	0.00306137	0.99173	*	0.982275	GO:0010008//endosome membrane;GO:0005768//endosome;GO:0030905//retromer, tubulation complex;GO:0030904//retromer complex;GO:0005829//cytosol;GO:0000139//Golgi membrane	GO:0032266//phosphatidylinositol-3-phosphate binding;GO:0035091//phosphatidylinositol binding	GO:0045053//protein retention in Golgi apparatus;GO:0042147//retrograde transport, endosome to Golgi;GO:0015031//protein transport	K17917//sorting nexin-1/2	NP_014712.2//sorting nexin 1 [Saccharomyces cerevisiae S288C]
BK006940.2_mrna_1887	330	18288.3	16942.8	-0.110253	0.916979	*	0.826432	GO:0005768//endosome;GO:0005634//nucleus;GO:0005829//cytosol;GO:0005886//plasma membrane;GO:0005737//cytoplasm	GO:0008289//lipid binding	GO:0071470//cellular response to osmotic stress;GO:0007155//cell adhesion;GO:0007009//plasma membrane organization;GO:0034599//cellular response to oxidative stress;GO:0034605//cellular response to heat	K10750//chromatin assembly factor 1 subunit A	NP_116640.1//lipid-binding protein HSP12 [Saccharomyces cerevisiae S288C]
BK006936.2_mrna_430	204	522.763	184.086	-1.50578	4.27262e-12	Down	1.51598e-13	GO:0016021//integral component of membrane	NA	NA	NA	NP_001032571.3//hypothetical protein YBR201C-A [Saccharomyces cerevisiae S288C]
BK006938.2_mrna_1190	396	10049.6	7524.72	-0.417422	0.00785245	*	0.001054	GO:0005634//nucleus;GO:0031298//replication fork protection complex;GO:0000786//nucleosome;GO:0000788//nuclear nucleosome	GO:0003677//DNA binding;GO:0046982//protein heterodimerization activity	GO:0000122//negative regulation of transcription by RNA polymerase II;GO:0006333//chromatin assembly or disassembly;GO:0006301//postreplication repair	K11252//histone H2B	CAY78724.1//Htb1p [Saccharomyces cerevisiae EC1118]
BK006948.2_mrna_5513	414	343.48	380.224	0.146623	0.656911	*	0.448874	NA	NA	NA	NA	NP_014655.1//hypothetical protein YOR012W [Saccharomyces cerevisiae S288C]
BK006938.2_mrna_1062	1323	123.115	119.542	-0.0424861	0.962254	*	0.921348	GO:0000943//retrotransposon nucleocapsid;GO:0005737//cytoplasm	GO:0003723//RNA binding	GO:0032197//transposition, RNA-mediated	NA	NP_058141.1//gag protein [Saccharomyces cerevisiae S288C]
BK006936.2_mrna_444	1584	2615.18	1346.87	-0.9573	0.0184776	*	0.0030028	GO:0005634//nucleus;GO:0005829//cytosol;GO:0005737//cytoplasm	NA	GO:0000920//septum digestion after cytokinesis;GO:0006897//endocytosis;GO:0030071//regulation of mitotic metaphase/anaphase transition;GO:0042149//cellular response to glucose starvation	NA	NP_009773.1//Sds24p [Saccharomyces cerevisiae S288C]
BK006948.2_mrna_5729	909	951.07	989.308	0.0568686	0.836714	*	0.697339	GO:0016021//integral component of membrane;GO:0005739//mitochondrion;GO:0005741//mitochondrial outer membrane;GO:0032592//integral component of mitochondrial membrane	NA	GO:0055088//lipid homeostasis;GO:0007005//mitochondrion organization	K00555//tRNA (guanine26-N2/guanine27-N2)-dimethyltransferase [EC:2.1.1.215 2.1.1.216]	NP_014871.3//Mcp1p [Saccharomyces cerevisiae S288C]
BK006935.2_mrna_34	1110	826.721	1019.67	0.302633	0.418835	*	0.215411	GO:0010494//cytoplasmic stress granule;GO:0005737//cytoplasm;GO:0005844//polysome	GO:0005525//GTP binding	GO:1903833//positive regulation of cellular response to amino acid starvation;GO:0002181//cytoplasmic translation	K06944//uncharacterized protein	NP_009364.1//GTP-binding protein RBG1 [Saccharomyces cerevisiae S288C]
BK006939.2_mrna_1739	414	3676.66	17426.5	2.24481	6.97802e-24	Up	9.81011e-26	GO:0005840//ribosome;GO:0005634//nucleus;GO:0005829//cytosol;GO:0022625//cytosolic large ribosomal subunit	GO:0003735//structural constituent of ribosome;GO:0070180//large ribosomal subunit rRNA binding	GO:0006412//translation;GO:0002181//cytoplasmic translation	K02894//large subunit ribosomal protein L23e	NP_009466.1//ribosomal 60S subunit protein L23A [Saccharomyces cerevisiae S288C]
BK006946.2_mrna_4553	1560	1699.15	2389.45	0.491868	0.0814181	*	0.0208212	GO:0005783//endoplasmic reticulum;GO:0030176//integral component of endoplasmic reticulum membrane;GO:0016021//integral component of membrane;GO:0005789//endoplasmic reticulum membrane	GO:0004168//dolichol kinase activity	GO:0006486//protein glycosylation;GO:0043048//dolichyl monophosphate biosynthetic process	K00902//dolichol kinase [EC:2.7.1.108]	NP_013726.1//dolichol kinase [Saccharomyces cerevisiae S288C]
BK006941.2_mrna_2237	378	55.6372	37.8909	-0.554197	0.260876	*	0.107101	GO:0016021//integral component of membrane	NA	NA	NA	NP_001335779.1//Brp1p [Saccharomyces cerevisiae S288C]
BK006938.2_mrna_923	2988	1542.82	1581.1	0.0353523	0.908975	*	0.812525	GO:0005730//nucleolus;GO:0030687//preribosome, large subunit precursor	GO:0003723//RNA binding;GO:0004004//ATP-dependent RNA helicase activity;GO:0005524//ATP binding;GO:0042802//identical protein binding	GO:1902626//assembly of large subunit precursor of preribosome;GO:0000466//maturation of 5.8S rRNA from tricistronic rRNA transcript (SSU-rRNA, 5.8S rRNA, LSU-rRNA);GO:0000463//maturation of LSU-rRNA from tricistronic rRNA transcript (SSU-rRNA, 5.8S rRNA, LSU-rRNA);GO:0006364//rRNA processing	K14808//ATP-dependent RNA helicase DDX54/DBP10 [EC:3.6.4.13]	NP_010253.2//putative ATP-dependent RNA helicase DBP10 [Saccharomyces cerevisiae S288C]
BK006944.2_mrna_3671	675	2594.49	2028.39	-0.355117	0.071037	*	0.0171909	GO:0005829//cytosol;GO:0005771//multivesicular body;GO:0000815//ESCRT III complex;GO:0005737//cytoplasm	GO:0042802//identical protein binding	GO:0032509//endosome transport via multivesicular body sorting pathway;GO:0070676//intralumenal vesicle formation;GO:1904669//ATP export;GO:0007034//vacuolar transport;GO:0043162//ubiquitin-dependent protein catabolic process via the multivesicular body sorting pathway;GO:0015031//protein transport;GO:0045324//late endosome to vacuole transport	K12193//charged multivesicular body protein 3	NP_012883.1//ESCRT-III subunit protein VPS24 [Saccharomyces cerevisiae S288C]
BK006938.2_mrna_1041	219	103.615	82.6014	-0.326999	0.499185	*	0.286896	GO:0005675//transcription factor TFIIH holo complex;GO:0005634//nucleus;GO:0005829//cytosol;GO:0005669//transcription factor TFIID complex;GO:0000439//transcription factor TFIIH core complex	GO:0003743//translation initiation factor activity	GO:0006294//nucleotide-excision repair, preincision complex assembly;GO:0006355//regulation of transcription, DNA-templated;GO:0070816//phosphorylation of RNA polymerase II C-terminal domain;GO:0006366//transcription by RNA polymerase II;GO:0006289//nucleotide-excision repair	K10845//TFIIH basal transcription factor complex TTD-A subunit	NP_076886.3//TFIIH complex subunit TFB5 [Saccharomyces cerevisiae S288C]
BK006939.2_mrna_1572	381	290.501	352.05	0.277236	0.570343	*	0.353389	GO:0005654//nucleoplasm;GO:1990904//ribonucleoprotein complex;GO:0005681//spliceosomal complex;GO:0032040//small-subunit processome;GO:0005730//nucleolus;GO:0031428//box C/D snoRNP complex;GO:0046540//U4/U6 x U5 tri-snRNP complex	GO:0034511//U3 snoRNA binding;GO:0003723//RNA binding;GO:0030621//U4 snRNA binding	GO:0031167//rRNA methylation;GO:0000470//maturation of LSU-rRNA;GO:0042254//ribosome biogenesis;GO:0000462//maturation of SSU-rRNA from tricistronic rRNA transcript (SSU-rRNA, 5.8S rRNA, LSU-rRNA);GO:0000398//mRNA splicing, via spliceosome;GO:0000451//rRNA 2'-O-methylation	K12845//U4/U6 small nuclear ribonucleoprotein SNU13	EGA83250.1//Snu13p [Saccharomyces cerevisiae Lalvin QA23]
BK006946.2_mrna_4435	1356	4776.5	5423.35	0.183229	0.416705	*	0.213871	GO:0005829//cytosol	GO:0043130//ubiquitin binding;GO:0005085//guanyl-nucleotide exchange factor activity	GO:0032511//late endosome to vacuole transport via multivesicular body sorting pathway;GO:0036010//protein localization to endosome;GO:0006623//protein targeting to vacuole;GO:0006895//Golgi to endosome transport;GO:0000011//vacuole inheritance	K20131//Rab5 GDP/GTP exchange factor	NP_013612.1//guanine nucleotide exchange factor VPS9 [Saccharomyces cerevisiae S288C]
BK006943.2_ncrna_3415	1489	204.746	278.853	0.445667	0.197826	*	0.071118	NA	NA	NA	NA	NA
BK006942.2_mrna_3009	1764	5308.75	5588.14	0.0739954	0.874642	*	0.754022	GO:0005634//nucleus;GO:0005829//cytosol	GO:0001228//DNA-binding transcription activator activity, RNA polymerase II-specific;GO:0043565//sequence-specific DNA binding;GO:0003700//DNA-binding transcription factor activity	GO:0045944//positive regulation of transcription by RNA polymerase II;GO:0071400//cellular response to oleic acid;GO:0043618//regulation of transcription from RNA polymerase II promoter in response to stress;GO:0071244//cellular response to carbon dioxide;GO:0061429//positive regulation of transcription from RNA polymerase II promoter by oleic acid	K09051//ATF/CREB family transcription factor;K09047//cyclic AMP-responsive element-binding protein 5;K21543//transcription factor CRZ1	NP_012228.1//Cst6p [Saccharomyces cerevisiae S288C]
BK006939.2_mrna_1595	846	30711.4	20180.8	-0.605789	0.0167922	*	0.00266146	GO:0005634//nucleus;GO:0005654//nucleoplasm;GO:0005667//transcription factor complex;GO:0000790//nuclear chromatin	GO:0000978//RNA polymerase II proximal promoter sequence-specific DNA binding;GO:0000981//DNA-binding transcription factor activity, RNA polymerase II-specific;GO:0042802//identical protein binding;GO:0043621//protein self-association;GO:0001085//RNA polymerase II transcription factor binding;GO:0003682//chromatin binding;GO:0043565//sequence-specific DNA binding;GO:0003700//DNA-binding transcrip…	GO:0060261//positive regulation of transcription initiation from RNA polymerase II promoter;GO:0008652//cellular amino acid biosynthetic process;GO:1903833//positive regulation of cellular response to amino acid starvation;GO:0045899//positive regulation of RNA polymerase II transcriptional preinitiation complex assembly;GO:0001080//nitrogen catabolite activation of transcription from RNA polymer…	K09464//general control protein GCN4	NP_010907.3//amino acid starvation-responsive transcription factor GCN4 [Saccharomyces cerevisiae S288C]
BK006937.2_mrna_698	549	1445.35	1709.6	0.242236	0.346615	*	0.163126	GO:0005634//nucleus;GO:0005737//cytoplasm	GO:0046872//metal ion binding	NA	NA	NP_010014.1//hypothetical protein YCR090C [Saccharomyces cerevisiae S288C]
BK006943.2_mrna_3404	930	2231.69	1679.02	-0.410516	0.00950512	*	0.00133628	NA	NA	NA	NA	NP_012616.1//Acf4p [Saccharomyces cerevisiae S288C]
BK006936.2_mrna_267	1719	7129.17	3997.9	-0.834493	1.97084e-05	*	1.37546e-06	GO:0005743//mitochondrial inner membrane;GO:0016021//integral component of membrane;GO:0005739//mitochondrion	GO:0005524//ATP binding;GO:0051082//unfolded protein binding	GO:0051131//chaperone-mediated protein complex assembly;GO:0034553//mitochondrial respiratory chain complex II assembly	K04077//chaperonin GroEL	NP_009600.2//Tcm62p [Saccharomyces cerevisiae S288C]
BK006948.2_mrna_5427	2874	3667.84	4392.06	0.259966	0.241674	*	0.095092	NA	NA	GO:0006357//regulation of transcription by RNA polymerase II	NA	NP_014578.1//Crt10p [Saccharomyces cerevisiae S288C]
BK006943.2_mrna_3201	2145	3042.02	3971.38	0.384612	0.0376553	*	0.00758498	GO:0005739//mitochondrion;GO:0005741//mitochondrial outer membrane	GO:0043130//ubiquitin binding;GO:0051082//unfolded protein binding	GO:0090141//positive regulation of mitochondrial fission;GO:0000002//mitochondrial genome maintenance;GO:0042273//ribosomal large subunit biogenesis;GO:0016559//peroxisome fission;GO:0000266//mitochondrial fission	K17970//mitochondrial division protein 1	NP_012423.1//Mdv1p [Saccharomyces cerevisiae S288C]
BK006936.2_mrna_394	423	1272.98	1577.38	0.309324	0.131482	*	0.0398958	GO:0000172//ribonuclease MRP complex;GO:0005634//nucleus;GO:0005697//telomerase holoenzyme complex;GO:0005655//nucleolar ribonuclease P complex	GO:0003723//RNA binding;GO:0004526//ribonuclease P activity;GO:0003676//nucleic acid binding	GO:0034965//intronic box C/D snoRNA processing;GO:0000294//nuclear-transcribed mRNA catabolic process, endonucleolytic cleavage-dependent decay;GO:0006364//rRNA processing;GO:0008033//tRNA processing	K14526//ribonuclease P/MRP protein subunit POP7 [EC:3.1.26.5]	NP_009726.3//ribonuclease P/MRP protein subunit POP7 [Saccharomyces cerevisiae S288C]
BK006944.2_mrna_3577	1293	470.315	581.493	0.306135	0.368068	*	0.177597	GO:0005759//mitochondrial matrix;GO:0005739//mitochondrion;GO:0005737//cytoplasm	GO:0004326//tetrahydrofolylpolyglutamate synthase activity;GO:0046872//metal ion binding;GO:0005524//ATP binding;GO:0008841//dihydrofolate synthase activity	GO:0006730//one-carbon metabolic process	K20457//dihydrofolate synthase [EC:6.3.2.12]	NP_012790.1//putative tetrahydrofolate synthase [Saccharomyces cerevisiae S288C]
BK006941.2_mrna_2356	234	510.9	610.139	0.256097	0.42836	*	0.223088	GO:0005783//endoplasmic reticulum;GO:0016021//integral component of membrane;GO:0033116//endoplasmic reticulum-Golgi intermediate compartment membrane;GO:0005789//endoplasmic reticulum membrane;GO:0012507//ER to Golgi transport vesicle membrane;GO:0005773//vacuole	NA	GO:0070072//vacuolar proton-transporting V-type ATPase complex assembly	NA	NP_011619.3//Vma21p [Saccharomyces cerevisiae S288C]
BK006940.2_mrna_1834	1179	228.391	227.291	-0.00696994	0.991588	*	0.981749	GO:0005634//nucleus	GO:0005524//ATP binding;GO:0004386//helicase activity;GO:0003676//nucleic acid binding	NA	K03257//translation initiation factor 4A	NP_116589.1//Y' element ATP-dependent helicase [Saccharomyces cerevisiae S288C]
BK006936.2_mrna_210	3735	4644.71	4089.49	-0.183667	0.679842	*	0.476402	GO:0010008//endosome membrane;GO:0005634//nucleus;GO:0030479//actin cortical patch;GO:0005938//cell cortex;GO:0043332//mating projection tip;GO:0005886//plasma membrane;GO:0005935//cellular bud neck	GO:0003779//actin binding;GO:0043130//ubiquitin binding;GO:0098748//endocytic adaptor activity;GO:0042802//identical protein binding	GO:0007015//actin filament organization;GO:0000147//actin cortical patch assembly;GO:0034316//negative regulation of Arp2/3 complex-mediated actin nucleation;GO:0006897//endocytosis	K20046//actin cytoskeleton-regulatory complex protein SLA1	NP_009546.1//cytoskeletal protein-binding protein SLA1 [Saccharomyces cerevisiae S288C]
BK006938.2_mrna_848	4311	1781.59	1486.47	-0.26127	0.390024	*	0.193543	GO:0005737//cytoplasm	GO:0003723//RNA binding;GO:0009020//tRNA (guanosine-2'-O-)-methyltransferase activity;GO:0016423//tRNA (guanine) methyltransferase activity	GO:0030488//tRNA methylation	K15333//tRNA guanosine-2'-O-methyltransferase [EC:2.1.1.34]	NP_010171.1//tRNA (guanosine(18)-2'-O)-methyltransferase [Saccharomyces cerevisiae S288C]
BK006941.2_mrna_2241	1254	1707.28	1819.08	0.0915085	0.744056	*	0.5544	GO:0005634//nucleus;GO:0000502//proteasome complex;GO:0005829//cytosol;GO:0005737//cytoplasm	NA	GO:0070682//proteasome regulatory particle assembly;GO:0006511//ubiquitin-dependent protein catabolic process	K11887//proteasomal ATPase-associated factor 1	NP_011511.3//Rpn14p [Saccharomyces cerevisiae S288C]
BK006948.2_mrna_5788	957	1215.67	1174.68	-0.0494795	0.878369	*	0.758705	GO:0005788//endoplasmic reticulum lumen;GO:0005783//endoplasmic reticulum;GO:0000324//fungal-type vacuole;GO:0005623//cell	GO:0015035//protein disulfide oxidoreductase activity;GO:0016853//isomerase activity;GO:0019153//protein-disulfide reductase (glutathione) activity;GO:0003756//protein disulfide isomerase activity	GO:0006457//protein folding;GO:0045454//cell redox homeostasis	K09584//protein disulfide-isomerase A6 [EC:5.3.4.1]	NP_014931.3//protein disulfide isomerase MPD1 [Saccharomyces cerevisiae S288C]
BK006945.2_mrna_4359	981	2389.48	2257.01	-0.0822879	0.726476	*	0.532668	GO:0005783//endoplasmic reticulum;GO:0016021//integral component of membrane;GO:0005739//mitochondrion;GO:0031966//mitochondrial membrane	GO:0016491//oxidoreductase activity	GO:0042493//response to drug	K06123//1-acylglycerone phosphate reductase [EC:1.1.1.101];K08876//SCY1-like protein 1;K10251//17beta-estradiol 17-dehydrogenase / very-long-chain 3-oxoacyl-CoA reductase [EC:1.1.1.62 1.1.1.330]	NP_013530.1//Tda5p [Saccharomyces cerevisiae S288C]
BK006944.2_mrna_3562	1923	1691.67	1276.05	-0.406768	0.200098	*	0.0727049	GO:0005743//mitochondrial inner membrane	GO:0050660//flavin adenine dinucleotide binding;GO:0008177//succinate dehydrogenase (ubiquinone) activity	GO:0006099//tricarboxylic acid cycle;GO:0022900//electron transport chain	K00234//succinate dehydrogenase (ubiquinone) flavoprotein subunit [EC:1.3.5.1]	AJS48645.1//Sdh1p [Saccharomyces cerevisiae YJM1388]
BK006945.2_mrna_4008	2580	2105.07	1701.29	-0.307238	0.324579	*	0.147541	GO:0005847//mRNA cleavage and polyadenylation specificity factor complex;GO:0005849//mRNA cleavage factor complex	GO:0003723//RNA binding	GO:0098789//pre-mRNA cleavage required for polyadenylation;GO:0006379//mRNA cleavage;GO:0006378//mRNA polyadenylation	K14402//cleavage and polyadenylation specificity factor subunit 2	NP_013216.1//cleavage polyadenylation factor subunit CFT2 [Saccharomyces cerevisiae S288C]
BK006946.2_mrna_4682	369	1741.51	1460.92	-0.253461	0.163222	*	0.0540614	GO:0005783//endoplasmic reticulum;GO:0030176//integral component of endoplasmic reticulum membrane;GO:0016021//integral component of membrane	NA	GO:0070072//vacuolar proton-transporting V-type ATPase complex assembly	K11866//STAM-binding protein [EC:3.4.19.12];K03349//anaphase-promoting complex subunit 2	NP_013842.1//Pkr1p [Saccharomyces cerevisiae S288C]
BK006949.2_mrna_5907	978	15384.3	10708	-0.522781	0.00236491	*	0.000261229	GO:0005634//nucleus;GO:0005737//cytoplasm	GO:0046872//metal ion binding;GO:0008168//methyltransferase activity;GO:0008898//S-adenosylmethionine-homocysteine S-methyltransferase activity	GO:0046498//S-adenosylhomocysteine metabolic process;GO:0050667//homocysteine metabolic process;GO:0019284//L-methionine salvage from S-adenosylmethionine	K00547//homocysteine S-methyltransferase [EC:2.1.1.10]	NP_015050.1//S-adenosylmethionine-homocysteine S-methyltransferase SAM4 [Saccharomyces cerevisiae S288C]
BK006945.2_mrna_4333	1104	637.807	1079.38	0.759012	0.00030098	*	2.58415e-05	NA	GO:0102266//tRNA-dihydrouridine20a synthase activity;GO:0017150//tRNA dihydrouridine synthase activity;GO:0050660//flavin adenine dinucleotide binding	GO:0006400//tRNA modification	K05545//tRNA-dihydrouridine synthase 4 [EC:1.3.1.90]	NP_013509.1//tRNA dihydrouridine synthase [Saccharomyces cerevisiae S288C]
BK006938.2_mrna_830	261	3398.47	3123.03	-0.12194	0.773986	*	0.59685	GO:0005739//mitochondrion	GO:0042030//ATPase inhibitor activity;GO:0051117//ATPase binding	GO:0032780//negative regulation of ATPase activity	K22255//ATPase inhibitor, mitochondrial	NP_010152.1//ATPase-binding protein [Saccharomyces cerevisiae S288C]
BK006944.2_mrna_3787	1047	16631.7	17035.4	0.0346029	0.904774	*	0.805167	GO:0005829//cytosol;GO:0005758//mitochondrial intermembrane space;GO:0005737//cytoplasm	GO:0009055//electron transfer activity;GO:0046872//metal ion binding;GO:0051537//2 iron, 2 sulfur cluster binding;GO:0051539//4 iron, 4 sulfur cluster binding	GO:0016226//iron-sulfur cluster assembly;GO:1901299//negative regulation of hydrogen peroxide-mediated programmed cell death;GO:0045019//negative regulation of nitric oxide biosynthetic process	K22746//anamorsin	NP_012997.3//electron carrier DRE2 [Saccharomyces cerevisiae S288C]
BK006935.2_mrna_29	1743	2252.36	2078.4	-0.115964	0.825543	*	0.671488	GO:0005634//nucleus;GO:0000307//cyclin-dependent protein kinase holoenzyme complex;GO:0005813//centrosome;GO:0005737//cytoplasm	GO:0016538//cyclin-dependent protein serine/threonine kinase regulator activity;GO:0019901//protein kinase binding	GO:0007089//traversing start control point of mitotic cell cycle;GO:0000278//mitotic cell cycle;GO:0006468//protein phosphorylation;GO:0042144//vacuole fusion, non-autophagic;GO:0007088//regulation of mitotic nuclear division;GO:0000083//regulation of transcription involved in G1/S transition of mitotic cell cycle;GO:0007033//vacuole organization;GO:0051301//cell division;GO:0000086//G2/M transit…	K06646//G1/S-specific cyclin CLN3	NP_009360.1//cyclin CLN3 [Saccharomyces cerevisiae S288C]
BK006948.2_mrna_5736	315	82.4443	80.0497	-0.0425236	0.948787	*	0.893686	GO:0016021//integral component of membrane	NA	NA	NA	NP_001335817.1//Irc13p [Saccharomyces cerevisiae S288C]
BK006934.2_mrna_2664	1101	198.05	161.008	-0.298731	0.413433	*	0.210918	GO:0005634//nucleus;GO:0005737//cytoplasm;GO:0070761//pre-snoRNP complex	GO:0046872//metal ion binding;GO:0003676//nucleic acid binding	GO:0048254//snoRNA localization;GO:0016074//snoRNA metabolic process;GO:0000463//maturation of LSU-rRNA from tricistronic rRNA transcript (SSU-rRNA, 5.8S rRNA, LSU-rRNA);GO:0000492//box C/D snoRNP assembly	NA	NP_011906.1//Bcd1p [Saccharomyces cerevisiae S288C]
BK006949.2_mrna_6140	2058	935.435	929.642	-0.00896188	0.985501	*	0.969997	GO:0005634//nucleus;GO:1990904//ribonucleoprotein complex;GO:0005730//nucleolus	GO:0003723//RNA binding;GO:0003729//mRNA binding;GO:0042802//identical protein binding;GO:0070180//large ribosomal subunit rRNA binding	GO:0000463//maturation of LSU-rRNA from tricistronic rRNA transcript (SSU-rRNA, 5.8S rRNA, LSU-rRNA);GO:0042273//ribosomal large subunit biogenesis	K14573//nucleolar protein 4	NP_015282.1//mRNA-binding ribosome biosynthesis protein NOP4 [Saccharomyces cerevisiae S288C]
BK006946.2_mrna_4595	5269	7914.66	7389.13	-0.0991219	0.844566	*	0.710142	GO:0000943//retrotransposon nucleocapsid;GO:0005634//nucleus;GO:0005737//cytoplasm	GO:0003723//RNA binding;GO:0003677//DNA binding;GO:0008233//peptidase activity;GO:0005524//ATP binding;GO:0004523//RNA-DNA hybrid ribonuclease activity;GO:0004190//aspartic-type endopeptidase activity;GO:0003964//RNA-directed DNA polymerase activity;GO:0003887//DNA-directed DNA polymerase activity;GO:0046872//metal ion binding;GO:0004540//ribonuclease activity	GO:0015074//DNA integration;GO:0032197//transposition, RNA-mediated;GO:0006310//DNA recombination	K14835//25S rRNA (cytosine2870-C5)-methyltransferase [EC:2.1.1.310]	CAA88411.1//unnamed protein product, partial [Saccharomyces cerevisiae]
BK006945.2_mrna_4180	966	20741.2	10731.3	-0.950666	1.53008e-06	*	9.14209e-08	GO:0005737//cytoplasm	NA	NA	NA	NP_013358.1//hypothetical protein YLR257W [Saccharomyces cerevisiae S288C]
BK006948.2_mrna_5369	1938	2041.14	1936.22	-0.076137	0.78617	*	0.613248	GO:0008180//COP9 signalosome;GO:0005737//cytoplasm	NA	GO:0000338//protein deneddylation;GO:0000754//adaptation of signaling pathway by response to pheromone involved in conjugation with cellular fusion	NA	NP_014524.1//Rri2p [Saccharomyces cerevisiae S288C]
BK006941.2_mrna_2434	279	498.063	686.835	0.463636	0.0450882	*	0.0096219	GO:0005634//nucleus;GO:0005737//cytoplasm	GO:0043022//ribosome binding	GO:0002182//cytoplasmic translational elongation;GO:0055072//iron ion homeostasis	NA	NP_878080.3//Lso2p [Saccharomyces cerevisiae S288C]
BK006934.2_mrna_2768	447	197.102	83.8883	-1.2324	1.40388e-05	Down	9.58632e-07	GO:0005737//cytoplasm	GO:0004860//protein kinase inhibitor activity;GO:0004857//enzyme inhibitor activity	GO:0006623//protein targeting to vacuole	NA	NP_012004.1//Spl2p [Saccharomyces cerevisiae S288C]
BK006947.3_mrna_5044	615	5155	3213.67	-0.681751	0.0210505	*	0.00355315	GO:0009277//fungal-type cell wall;GO:0005576//extracellular region;GO:0031225//anchored component of membrane	NA	GO:0042631//cellular response to water deprivation	NA	NP_014209.1//hypothetical protein YNL190W [Saccharomyces cerevisiae S288C]
BK006937.2_mrna_660	1476	913.244	1020.69	0.160473	0.676787	*	0.472064	GO:0005615//extracellular space;GO:0005635//nuclear envelope;GO:0005619//ascospore wall	GO:0004252//serine-type endopeptidase activity;GO:0008236//serine-type peptidase activity	GO:0030476//ascospore wall assembly	K14644//subtilase-type proteinase RRT12 [EC:3.4.21.-]	NP_009974.1//Rrt12p [Saccharomyces cerevisiae S288C]
BK006948.2_mrna_5858	1896	6694.57	6436.09	-0.056807	0.852598	*	0.720178	GO:0005739//mitochondrion;GO:0031305//integral component of mitochondrial inner membrane	GO:0043783//oxidoreductase activity, oxidizing metal ions with flavin as acceptor;GO:0004174//electron-transferring-flavoprotein dehydrogenase activity;GO:0009055//electron transfer activity;GO:0046872//metal ion binding;GO:0051539//4 iron, 4 sulfur cluster binding;GO:0048039//ubiquinone binding	GO:0022904//respiratory electron transport chain	K00311//electron-transferring-flavoprotein dehydrogenase [EC:1.5.5.1]	NP_015001.1//putative electron-transferring-flavoprotein dehydrogenase [Saccharomyces cerevisiae S288C]
BK006941.2_mrna_2402	2124	237.954	260.169	0.128766	0.823578	*	0.6673	GO:0005634//nucleus;GO:0030686//90S preribosome;GO:0032040//small-subunit processome;GO:0005730//nucleolus	NA	GO:0000462//maturation of SSU-rRNA from tricistronic rRNA transcript (SSU-rRNA, 5.8S rRNA, LSU-rRNA);GO:0042274//ribosomal small subunit biogenesis	K14788//ribosome biogenesis protein ENP2	NP_011661.2//ribosome biosynthesis protein ENP2 [Saccharomyces cerevisiae S288C]
BK006949.2_mrna_6193	3612	577.813	856.879	0.56849	0.220904	*	0.0835922	GO:0005634//nucleus;GO:0005736//RNA polymerase I complex	GO:0003899//DNA-directed 5'-3' RNA polymerase activity;GO:0032549//ribonucleoside binding;GO:0046872//metal ion binding;GO:0003677//DNA binding;GO:0001054//RNA polymerase I activity	GO:0042254//ribosome biogenesis;GO:0006360//transcription by RNA polymerase I;GO:0042790//nucleolar large rRNA transcription by RNA polymerase I;GO:0006351//transcription, DNA-templated	K03002//DNA-directed RNA polymerase I subunit RPA2 [EC:2.7.7.6]	NP_015335.1//DNA-directed RNA polymerase I core subunit RPA135 [Saccharomyces cerevisiae S288C]
BK006938.2_mrna_746	954	384.701	144.218	-1.41549	2.30772e-09	Down	9.84883e-11	GO:0016021//integral component of membrane;GO:0005737//cytoplasm	NA	NA	NA	NP_010063.1//hypothetical protein YDL218W [Saccharomyces cerevisiae S288C]
BK006946.2_mrna_4830	1662	3191.1	4044.09	0.34176	0.263001	*	0.108458	GO:0005634//nucleus;GO:0005783//endoplasmic reticulum;GO:0005623//cell;GO:0005737//cytoplasm;GO:0030659//cytoplasmic vesicle membrane	GO:0005095//GTPase inhibitor activity	GO:0006623//protein targeting to vacuole;GO:0006897//endocytosis;GO:0034260//negative regulation of GTPase activity	NA	NP_013985.1//Roy1p [Saccharomyces cerevisiae S288C]
BK006934.2_mrna_2619	1341	2533.66	2914.15	0.201852	0.531961	*	0.315793	GO:0031965//nuclear membrane;GO:0005811//lipid droplet;GO:0016021//integral component of membrane;GO:0071595//Nem1-Spo7 phosphatase complex;GO:0005739//mitochondrion;GO:0005789//endoplasmic reticulum membrane	GO:0004721//phosphoprotein phosphatase activity;GO:0016791//phosphatase activity	GO:0071072//negative regulation of phospholipid biosynthetic process;GO:0006470//protein dephosphorylation;GO:1903740//positive regulation of phosphatidate phosphatase activity;GO:0006998//nuclear envelope organization	K17617//CTD nuclear envelope phosphatase 1 [EC:3.1.3.16]	NP_011867.1//Nem1-Spo7 phosphatase catalytic subunit NEM1 [Saccharomyces cerevisiae S288C]
BK006949.2_mrna_6327	1659	1988.52	1535.72	-0.372783	0.145171	*	0.0459823	GO:0005634//nucleus;GO:0005654//nucleoplasm;GO:0030686//90S preribosome;GO:0030692//Noc4p-Nop14p complex;GO:0005730//nucleolus;GO:0032040//small-subunit processome;GO:0005829//cytosol;GO:0030688//preribosome, small subunit precursor	NA	GO:0031167//rRNA methylation;GO:0042254//ribosome biogenesis;GO:0000472//endonucleolytic cleavage to generate mature 5'-end of SSU-rRNA from (SSU-rRNA, 5.8S rRNA, LSU-rRNA);GO:0042274//ribosomal small subunit biogenesis;GO:0000447//endonucleolytic cleavage in ITS1 to separate SSU-rRNA from 5.8S rRNA and LSU-rRNA from tricistronic rRNA transcript (SSU-rRNA, 5.8S rRNA, LSU-rRNA);GO:0006364//rRNA pr…	K14771//U3 small nucleolar RNA-associated protein 19	NP_015470.1//ribosome biosynthesis protein NOC4 [Saccharomyces cerevisiae S288C]
BK006937.2_mrna_665	669	844.119	689.961	-0.290931	0.311586	*	0.138819	GO:0005634//nucleus;GO:0005737//cytoplasm	NA	NA	K06867//uncharacterized protein	NP_009980.1//hypothetical protein YCR051W [Saccharomyces cerevisiae S288C]
BK006949.2_mrna_6315	807	2567.74	2440.04	-0.0735928	0.785191	*	0.611046	GO:0005739//mitochondrion	NA	GO:0090615//mitochondrial mRNA processing;GO:0000372//Group I intron splicing	NA	NP_015460.1//Mss18p [Saccharomyces cerevisiae S288C]
BK006948.2_mrna_5680	816	704.926	848.624	0.267654	0.343344	*	0.16061	GO:0005782//peroxisomal matrix;GO:0005777//peroxisome;GO:0005737//cytoplasm	GO:0003824//catalytic activity;GO:0004165//dodecenoyl-CoA delta-isomerase activity	GO:0006635//fatty acid beta-oxidation	K22587//Delta3,5-Delta2,4-dienoyl-CoA isomerase [EC:5.3.3.21]	NP_014823.3//putative dodecenoyl-CoA isomerase DCI1 [Saccharomyces cerevisiae S288C]
BK006941.2_mrna_2446	1038	9853.5	6116.45	-0.687943	5.98326e-06	*	3.86534e-07	GO:0005634//nucleus;GO:0005971//ribonucleoside-diphosphate reductase complex;GO:0005737//cytoplasm	GO:0004748//ribonucleoside-diphosphate reductase activity, thioredoxin disulfide as acceptor;GO:0046982//protein heterodimerization activity;GO:0016491//oxidoreductase activity	GO:0009263//deoxyribonucleotide biosynthetic process;GO:0051188//cofactor biosynthetic process;GO:0006260//DNA replication	K10808//ribonucleoside-diphosphate reductase subunit M2 [EC:1.17.4.1]	NP_011696.3//ribonucleotide-diphosphate reductase subunit RNR4 [Saccharomyces cerevisiae S288C]
BK006938.2_mrna_1496	90	18.612	14.9005	-0.320873	0.696822	*	0.495996	NA	NA	NA	NA	NP_878066.3//hypothetical protein YDR524W-C [Saccharomyces cerevisiae S288C]
BK006948.2_mrna_5454	96	2.08592	2.17905	0.0630165	0.947458	*	0.890944	NA	NA	NA	NA	NP_878164.1//hypothetical protein YOL038C-A [Saccharomyces cerevisiae S288C]
BK006936.2_mrna_406	711	2945.02	11836.2	2.00685	4.22185e-21	Up	8.54969e-23	GO:0005840//ribosome;GO:0005654//nucleoplasm;GO:0030686//90S preribosome;GO:0032040//small-subunit processome;GO:0005730//nucleolus;GO:0022627//cytosolic small ribosomal subunit;GO:0005737//cytoplasm	GO:0003735//structural constituent of ribosome	GO:0031167//rRNA methylation;GO:0000462//maturation of SSU-rRNA from tricistronic rRNA transcript (SSU-rRNA, 5.8S rRNA, LSU-rRNA);GO:0006412//translation;GO:0002181//cytoplasmic translation	K02991//small subunit ribosomal protein S6e	NP_015235.1//ribosomal 40S subunit protein S6A [Saccharomyces cerevisiae S288C]
BK006938.2_mrna_1443	1509	905.228	1109.74	0.293864	0.247857	*	0.0986866	GO:0031307//integral component of mitochondrial outer membrane;GO:0016021//integral component of membrane;GO:0005739//mitochondrion;GO:0005741//mitochondrial outer membrane	GO:0022857//transmembrane transporter activity	GO:0008053//mitochondrial fusion	K17967//mitochondrial fusion and transport protein UGO1	NP_010758.3//Ugo1p [Saccharomyces cerevisiae S288C]
BK006942.2_mrna_2976	408	1269.38	6886.64	2.43967	2.65973e-38	Up	1.2464e-40	GO:0005840//ribosome;GO:0005739//mitochondrion;GO:0022627//cytosolic small ribosomal subunit	GO:0003735//structural constituent of ribosome	GO:0000462//maturation of SSU-rRNA from tricistronic rRNA transcript (SSU-rRNA, 5.8S rRNA, LSU-rRNA);GO:0006412//translation;GO:0002181//cytoplasmic translation	K02974//small subunit ribosomal protein S24e	NP_012195.1//ribosomal 40S subunit protein S24B [Saccharomyces cerevisiae S288C]
BK006941.2_mrna_2407	1299	7986.83	9059.75	0.181848	0.3331	*	0.153421	GO:0005783//endoplasmic reticulum;GO:0016021//integral component of membrane;GO:0071944//cell periphery	GO:0071617//lysophospholipid acyltransferase activity	GO:0006656//phosphatidylcholine biosynthetic process	NA	NP_011665.1//glycerophosphocholine acyltransferase [Saccharomyces cerevisiae S288C]
BK006945.2_mrna_4303	2706	1566.53	1629.68	0.0570119	0.921999	*	0.839134	GO:0005634//nucleus;GO:0005887//integral component of plasma membrane;GO:0005773//vacuole	GO:0046872//metal ion binding;GO:0003677//DNA binding	GO:0007039//protein catabolic process in the vacuole;GO:0015031//protein transport	K03114//mitosis inhibitor protein kinase SWE1 [EC:2.7.11.1];K04718//sphingosine kinase [EC:2.7.1.91];K15154//mediator of RNA polymerase II transcription subunit 2	NP_013477.1//Vid22p [Saccharomyces cerevisiae S288C]
BK006945.2_mrna_3949	2550	1534.6	1685.83	0.135595	0.612553	*	0.39921	GO:0005783//endoplasmic reticulum;GO:0016021//integral component of membrane;GO:0005789//endoplasmic reticulum membrane;GO:0000139//Golgi membrane	GO:0004571//mannosyl-oligosaccharide 1,2-alpha-mannosidase activity;GO:0005509//calcium ion binding	GO:0006486//protein glycosylation;GO:0030433//ubiquitin-dependent ERAD pathway;GO:0006491//N-glycan processing	K01230//mannosyl-oligosaccharide alpha-1,2-mannosidase [EC:3.2.1.113]	NP_013158.1//putative mannosidase MNL2 [Saccharomyces cerevisiae S288C]
BK006941.2_mrna_2381	1719	7877.74	9653.28	0.293237	0.492253	*	0.281746	GO:0005829//cytosol;GO:0005737//cytoplasm	GO:0005524//ATP binding;GO:0042803//protein homodimerization activity;GO:0004066//asparagine synthase (glutamine-hydrolyzing) activity	GO:0070981//L-asparagine biosynthetic process;GO:0006541//glutamine metabolic process;GO:0006529//asparagine biosynthetic process	K01953//asparagine synthase (glutamine-hydrolysing) [EC:6.3.5.4]	NP_011640.1//asparagine synthase (glutamine-hydrolyzing) 2 [Saccharomyces cerevisiae S288C]
BK006936.2_mrna_385	1044	4799.41	4675.22	-0.037824	0.893951	*	0.787125	GO:0005783//endoplasmic reticulum;GO:0016021//integral component of membrane;GO:0005789//endoplasmic reticulum membrane	GO:0102341//3-oxo-lignoceroyl-CoA reductase activity;GO:0102342//3-oxo-cerotoyl-CoA reductase activity;GO:0045703//ketoreductase activity;GO:0102340//3-oxo-behenoyl-CoA reductase activity;GO:0016491//oxidoreductase activity;GO:0102339//3-oxo-arachidoyl-CoA reductase activity	GO:0030497//fatty acid elongation;GO:0030148//sphingolipid biosynthetic process;GO:0042761//very long-chain fatty acid biosynthetic process	K10251//17beta-estradiol 17-dehydrogenase / very-long-chain 3-oxoacyl-CoA reductase [EC:1.1.1.62 1.1.1.330]	NP_009717.1//ketoreductase [Saccharomyces cerevisiae S288C]
BK006949.2_mrna_6057	3099	3085.44	3677.91	0.253413	0.255547	*	0.103531	GO:0005643//nuclear pore;GO:0005634//nucleus;GO:0005635//nuclear envelope;GO:0005829//cytosol;GO:0016021//integral component of membrane;GO:0005737//cytoplasm	GO:0008536//Ran GTPase binding;GO:0008565//protein transporter activity;GO:0008139//nuclear localization sequence binding	GO:0006886//intracellular protein transport;GO:0006606//protein import into nucleus	K20223//importin-7;K18423//exportin-2 (importin alpha re-exporter)	NP_015200.1//Kap120p [Saccharomyces cerevisiae S288C]
BK006949.2_mrna_5929	1467	3108.52	2341.56	-0.40876	0.0769533	*	0.0191853	GO:0000124//SAGA complex;GO:0070461//SAGA-type complex;GO:0005671//Ada2/Gcn5/Ada3 transcription activator complex;GO:0046695//SLIK (SAGA-like) complex	GO:0003713//transcription coactivator activity;GO:0003712//transcription coregulator activity;GO:0016740//transferase activity	GO:0006357//regulation of transcription by RNA polymerase II;GO:0043966//histone H3 acetylation;GO:0006325//chromatin organization;GO:0016573//histone acetylation;GO:0006366//transcription by RNA polymerase II	K11362//transcriptional coactivator HFI1/ADA1	NP_015069.1//Hfi1p [Saccharomyces cerevisiae S288C]
BK006939.2_mrna_1730	909	84.8533	92.871	0.130258	0.870445	*	0.748073	GO:0000778//condensed nuclear chromosome kinetochore;GO:0033551//monopolin complex	NA	GO:0045859//regulation of protein kinase activity;GO:0010789//meiotic sister chromatid cohesion involved in meiosis I;GO:0045143//homologous chromosome segregation;GO:0051455//attachment of spindle microtubules to kinetochore involved in homologous chromosome segregation;GO:0045132//meiotic chromosome segregation	K12774//monopolin complex subunit MAM1	NP_011032.1//Mam1p [Saccharomyces cerevisiae S288C]
BK006947.3_mrna_5267	1656	3353.98	2948.35	-0.185968	0.358917	*	0.171679	GO:0005788//endoplasmic reticulum lumen;GO:0005783//endoplasmic reticulum;GO:0016021//integral component of membrane;GO:0005789//endoplasmic reticulum membrane	GO:0000009//alpha-1,6-mannosyltransferase activity;GO:0000030//mannosyltransferase activity;GO:0052824//dolichyl-pyrophosphate Man7GlcNAc2 alpha-1,6-mannosyltransferase activity;GO:0052917//dol-P-Man:Man(7)GlcNAc(2)-PP-Dol alpha-1,6-mannosyltransferase activity	GO:0006486//protein glycosylation;GO:0006487//protein N-linked glycosylation;GO:0006488//dolichol-linked oligosaccharide biosynthetic process	K03847//alpha-1,6-mannosyltransferase [EC:2.4.1.260]	NP_014427.1//dolichyl-P-Man:Man(7)GlcNAc(2)-PP-dolichol alpha-1,6-mannosyltransferase [Saccharomyces cerevisiae S288C]
BK006941.2_mrna_2538	702	471.557	570.344	0.274398	0.463931	*	0.254444	GO:0005730//nucleolus;GO:0030685//nucleolar preribosome;GO:0030688//preribosome, small subunit precursor	NA	GO:0071027//nuclear RNA surveillance;GO:0000462//maturation of SSU-rRNA from tricistronic rRNA transcript (SSU-rRNA, 5.8S rRNA, LSU-rRNA);GO:0000321//re-entry into mitotic cell cycle after pheromone arrest;GO:0006364//rRNA processing	NA	NP_076891.4//Efg1p [Saccharomyces cerevisiae S288C]
BK006941.2_mrna_2331	633	1169.28	1119.77	-0.0624188	0.895079	*	0.788481	GO:0005634//nucleus;GO:0030686//90S preribosome;GO:0005730//nucleolus;GO:0030688//preribosome, small subunit precursor	NA	GO:0000462//maturation of SSU-rRNA from tricistronic rRNA transcript (SSU-rRNA, 5.8S rRNA, LSU-rRNA);GO:0000056//ribosomal small subunit export from nucleus	K14804//ribosome biogenesis protein SLX9	NP_011595.3//Slx9p [Saccharomyces cerevisiae S288C]
BK006945.2_mrna_4385	7887	4885.64	4156.46	-0.23319	0.499185	*	0.286808	GO:0005739//mitochondrion	NA	NA	NA	NP_013559.1//Fmp27p [Saccharomyces cerevisiae S288C]
BK006944.2_mrna_3551	438	3668.23	2743.5	-0.419064	0.0674505	*	0.0160527	GO:0005634//nucleus;GO:0008023//transcription elongation factor complex	GO:0046872//metal ion binding;GO:0003746//translation elongation factor activity;GO:0000993//RNA polymerase II complex binding	GO:0006368//transcription elongation from RNA polymerase II promoter;GO:0048096//chromatin-mediated maintenance of transcription	NA	NP_012762.1//Elf1p [Saccharomyces cerevisiae S288C]
BK006943.2_mrna_3266	1353	2207.89	3278.72	0.570467	0.0144196	*	0.00219129	NA	NA	GO:0007034//vacuolar transport	K15053//charged multivesicular body protein 7	NP_012486.3//Chm7p [Saccharomyces cerevisiae S288C]
BK006944.2_mrna_3669	1101	5061.46	1530.12	-1.72591	1.18973e-05	Down	8.00453e-07	GO:0005634//nucleus	GO:0003677//DNA binding;GO:0043565//sequence-specific DNA binding;GO:0003700//DNA-binding transcription factor activity	GO:0045944//positive regulation of transcription by RNA polymerase II;GO:2000222//positive regulation of pseudohyphal growth	K12763//enhanced filamentous growth protein 1	NP_012881.1//Phd1p [Saccharomyces cerevisiae S288C]
BK006941.2_mrna_2371	438	5672.31	15281.1	1.42974	3.27061e-14	Up	1.02908e-15	GO:0022627//cytosolic small ribosomal subunit;GO:0015935//small ribosomal subunit	GO:0003735//structural constituent of ribosome	GO:0000462//maturation of SSU-rRNA from tricistronic rRNA transcript (SSU-rRNA, 5.8S rRNA, LSU-rRNA);GO:1990145//maintenance of translational fidelity;GO:0006412//translation;GO:0006450//regulation of translational fidelity	K02973//small subunit ribosomal protein S23e	NP_015457.1//ribosomal 40S subunit protein S23B [Saccharomyces cerevisiae S288C]
BK006936.2_mrna_190	438	676.439	922.324	0.447313	0.0753859	*	0.0186304	GO:0005730//nucleolus;GO:0000500//RNA polymerase I upstream activating factor complex	GO:0001165//RNA polymerase I upstream control element sequence-specific DNA binding;GO:0001181//RNA polymerase I general transcription initiation factor activity	GO:0042790//nucleolar large rRNA transcription by RNA polymerase I	K15221//RNA polymerase I-specific transcription initiation factor RRN10	NP_009528.1//Rrn10p [Saccharomyces cerevisiae S288C]
BK006949.2_mrna_5900	714	400.639	307.613	-0.381184	0.338383	*	0.1571	GO:0010494//cytoplasmic stress granule;GO:0000932//P-body	GO:0008233//peptidase activity;GO:0008234//cysteine-type peptidase activity;GO:0051082//unfolded protein binding;GO:0019172//glyoxalase III activity	GO:0031669//cellular response to nutrient levels	K22211//D-lactate dehydratase [EC:4.2.1.130]	NP_015043.1//glutathione-independent methylglyoxalase family protein [Saccharomyces cerevisiae S288C]
BK006941.2_mrna_2360	1416	1171.98	2127.58	0.860264	3.99945e-06	*	2.53689e-07	GO:0005634//nucleus;GO:0000307//cyclin-dependent protein kinase holoenzyme complex;GO:0005813//centrosome;GO:0005737//cytoplasm	GO:0016538//cyclin-dependent protein serine/threonine kinase regulator activity;GO:0019901//protein kinase binding	GO:0060631//regulation of meiosis I;GO:0000278//mitotic cell cycle;GO:0006468//protein phosphorylation;GO:0007088//regulation of mitotic nuclear division;GO:0010696//positive regulation of mitotic spindle pole body separation;GO:0051301//cell division;GO:0007052//mitotic spindle organization;GO:0000086//G2/M transition of mitotic cell cycle;GO:0008315//G2/MI transition of meiotic cell cycle;GO:00…	K02220//G2/mitotic-specific cyclin 1/2	NP_011622.1//B-type cyclin CLB1 [Saccharomyces cerevisiae S288C]
BK006948.2_mrna_5622	1395	4196.12	4185.38	-0.00369664	0.991932	*	0.983631	GO:0016593//Cdc73/Paf1 complex	GO:0003723//RNA binding;GO:1990269//RNA polymerase II C-terminal domain phosphoserine binding;GO:0003712//transcription coregulator activity;GO:0001085//RNA polymerase II transcription factor binding	GO:0006368//transcription elongation from RNA polymerase II promoter;GO:0006353//DNA-templated transcription, termination;GO:0032968//positive regulation of transcription elongation from RNA polymerase II promoter;GO:0090262//regulation of transcription-coupled nucleotide-excision repair;GO:0080182//histone H3-K4 trimethylation;GO:2001173//regulation of histone H2B conserved C-terminal lysine ubi…	K15177//RNA polymerase-associated protein LEO1	EEU07952.1//Leo1p [Saccharomyces cerevisiae JAY291]
BK006947.3_mrna_5078	390	1480.45	2099.12	0.503752	0.0316055	*	0.00592967	GO:0016272//prefoldin complex;GO:0005737//cytoplasm	GO:0015631//tubulin binding;GO:0051082//unfolded protein binding	GO:0006457//protein folding;GO:0071629//cytoplasm protein quality control by the ubiquitin-proteasome system;GO:0032968//positive regulation of transcription elongation from RNA polymerase II promoter;GO:0007021//tubulin complex assembly	K09550//prefoldin subunit 4	NP_014246.1//tubulin-binding prefolding complex subunit GIM3 [Saccharomyces cerevisiae S288C]
BK006943.2_mrna_3318	357	437.513	358.058	-0.289133	0.210307	*	0.0780343	GO:0005743//mitochondrial inner membrane;GO:0016021//integral component of membrane;GO:0031966//mitochondrial membrane;GO:0005739//mitochondrion	NA	GO:0033617//mitochondrial respiratory chain complex IV assembly	K18182//cytochrome c oxidase assembly protein subunit 16	NP_012531.1//Cox16p [Saccharomyces cerevisiae S288C]
BK006947.3_mrna_5031	1368	2400.36	4070.93	0.76211	1.49827e-05	*	1.0281e-06	GO:0005634//nucleus;GO:0005694//chromosome	GO:0042393//histone binding;GO:0003677//DNA binding;GO:0042802//identical protein binding;GO:0003690//double-stranded DNA binding	GO:0006368//transcription elongation from RNA polymerase II promoter;GO:0000122//negative regulation of transcription by RNA polymerase II;GO:0006335//DNA replication-dependent nucleosome assembly;GO:0006336//DNA replication-independent nucleosome assembly;GO:0032196//transposition;GO:0070869//heterochromatin assembly involved in chromatin silencing	K14823//rRNA-processing protein EBP2;K09272//structure-specific recognition protein 1	NP_014193.1//Rtt106p [Saccharomyces cerevisiae S288C]
BK006934.2_mrna_2794	3495	2053.94	1582.96	-0.37577	0.376128	*	0.184255	GO:0005938//cell cortex;GO:0043332//mating projection tip;GO:0005934//cellular bud tip;GO:0005737//cytoplasm;GO:0005935//cellular bud neck;GO:0051285//cell cortex of cell tip;GO:1990615//Kelch-containing formin regulatory complex;GO:0005628//prospore membrane	GO:0042802//identical protein binding	GO:0060627//regulation of vesicle-mediated transport;GO:0001100//negative regulation of exit from mitosis;GO:0032465//regulation of cytokinesis;GO:0008360//regulation of cell shape;GO:0090337//regulation of formin-nucleated actin cable assembly;GO:0000755//cytogamy	K20361//intracellular protein transport protein USO1	NP_012028.1//Kel1p [Saccharomyces cerevisiae S288C]
BK006946.2_mrna_4654	1863	1599.16	1935.58	0.27545	0.310052	*	0.137357	GO:1990304//MUB1-RAD6-UBR2 ubiquitin ligase complex;GO:0005737//cytoplasm	GO:0046872//metal ion binding	GO:0006511//ubiquitin-dependent protein catabolic process;GO:0007163//establishment or maintenance of cell polarity	NA	NP_013818.1//Mub1p [Saccharomyces cerevisiae S288C]
BK006934.2_ncrna_2791	90	0.167187	0.173923	0.0569864	0.832499	*	0.687431	NA	NA	NA	NA	NA
BK006942.2_mrna_2946	468	1258.46	866.326	-0.538676	0.00191847	*	0.00020774	GO:0005759//mitochondrial matrix;GO:0005739//mitochondrion	NA	GO:0033615//mitochondrial proton-transporting ATP synthase complex assembly;GO:0016236//macroautophagy	K18191//ATP synthase assembly factor FMC1, mitochondrial	NP_012168.3//Fmc1p [Saccharomyces cerevisiae S288C]
BK006948.2_mrna_5594	4947	4689.26	4291.82	-0.12777	0.64405	*	0.43375	GO:0005829//cytosol;GO:0016021//integral component of membrane;GO:0005935//cellular bud neck	GO:0003824//catalytic activity	NA	NA	NP_014736.1//Cmr2p [Saccharomyces cerevisiae S288C]
BK006938.2_mrna_1144	4482	752.344	907.148	0.269945	0.351852	*	0.16636	GO:0005634//nucleus;GO:0000785//chromatin;GO:0000790//nuclear chromatin;GO:0000775//chromosome, centromeric region;GO:0090694//Scc2-Scc4 cohesin loading complex;GO:0000228//nuclear chromosome;GO:0032116//SMC loading complex;GO:0005829//cytosol;GO:0005729//2-micrometer circle DNA	GO:0003682//chromatin binding;GO:0043565//sequence-specific DNA binding	GO:1990414//replication-born double-strand break repair via sister chromatid exchange;GO:0010468//regulation of gene expression;GO:0071168//protein localization to chromatin;GO:0000972//transcription-dependent tethering of RNA polymerase II gene DNA at nuclear periphery;GO:0070058//tRNA gene clustering;GO:0007076//mitotic chromosome condensation;GO:0006302//double-strand break repair;GO:0070550//…	K06672//cohesin loading factor subunit SCC2	NP_010466.3//cohesin-loading factor complex subunit SCC2 [Saccharomyces cerevisiae S288C]
BK006944.2_mrna_3806	2733	6905.1	6367.45	-0.116948	0.800531	*	0.632129	GO:0005811//lipid droplet;GO:0016021//integral component of membrane	GO:0004806//triglyceride lipase activity;GO:0004771//sterol esterase activity;GO:0047499//calcium-independent phospholipase A2 activity;GO:0042171//lysophosphatidic acid acyltransferase activity	GO:0019433//triglyceride catabolic process;GO:0016042//lipid catabolic process;GO:0006642//triglyceride mobilization;GO:0030435//sporulation resulting in formation of a cellular spore;GO:0007114//cell budding;GO:0006644//phospholipid metabolic process	K14674//TAG lipase / steryl ester hydrolase / phospholipase A2 / LPA acyltransferase [EC:3.1.1.3 3.1.1.13 3.1.1.4 2.3.1.51]	NP_013015.1//Tgl4p [Saccharomyces cerevisiae S288C]
BK006936.2_mrna_157	627	2238.56	2696.88	0.26872	0.221166	*	0.0838016	GO:0005829//cytosol;GO:0005739//mitochondrion;GO:0005741//mitochondrial outer membrane;GO:0005737//cytoplasm	GO:0004045//aminoacyl-tRNA hydrolase activity	GO:0032435//negative regulation of proteasomal ubiquitin-dependent protein catabolic process	K04794//peptidyl-tRNA hydrolase, PTH2 family [EC:3.1.1.29]	CAA80790.1//YBLO514 [Saccharomyces cerevisiae]
BK006949.2_mrna_6288	213	0.864911	0.784706	-0.1404	0.785191	*	0.611831	NA	NA	NA	NA	NP_878183.1//hypothetical protein YPR108W-A [Saccharomyces cerevisiae S288C]
BK006941.2_mrna_2554	1422	3223.68	1453.94	-1.14874	3.62935e-11	Down	1.3424e-12	GO:0005634//nucleus	GO:0000981//DNA-binding transcription factor activity, RNA polymerase II-specific;GO:0003677//DNA binding;GO:0008270//zinc ion binding;GO:0003700//DNA-binding transcription factor activity	GO:0000023//maltose metabolic process;GO:0006355//regulation of transcription, DNA-templated;GO:0006351//transcription, DNA-templated;GO:0044262//cellular carbohydrate metabolic process	K01182//oligo-1,6-glucosidase [EC:3.2.1.10];K21450//arabinolytic transcriptional activator AraR;K08141//MFS transporter, SP family, general alpha glucoside:H+ symporter;K21451//xylanolytic transcriptional activator XlnR	NP_011804.1//transcription factor MAL13 [Saccharomyces cerevisiae S288C]
BK006938.2_mrna_871	786	1337.79	1255.15	-0.0919913	0.764169	*	0.580042	GO:0005685//U1 snRNP;GO:0071004//U2-type prespliceosome;GO:0005634//nucleus;GO:0005829//cytosol	GO:0003729//mRNA binding	GO:0006376//mRNA splice site selection	NA	NP_010196.1//Luc7p [Saccharomyces cerevisiae S288C]
BK006938.2_mrna_1020	447	2533.93	1294.82	-0.968624	0.000221424	*	1.87145e-05	GO:0005634//nucleus;GO:0000151//ubiquitin ligase complex;GO:0005737//cytoplasm	GO:0043130//ubiquitin binding;GO:0005524//ATP binding;GO:0030674//protein binding, bridging;GO:0031625//ubiquitin protein ligase binding;GO:0070628//proteasome binding;GO:0016740//transferase activity;GO:0061631//ubiquitin conjugating enzyme activity;GO:0004842//ubiquitin-protein transferase activity	GO:0071629//cytoplasm protein quality control by the ubiquitin-proteasome system;GO:0006511//ubiquitin-dependent protein catabolic process;GO:0006513//protein monoubiquitination;GO:0043162//ubiquitin-dependent protein catabolic process via the multivesicular body sorting pathway;GO:0034605//cellular response to heat;GO:0000209//protein polyubiquitination	K06689//ubiquitin-conjugating enzyme E2 D [EC:2.3.2.23]	NP_010344.1//E2 ubiquitin-conjugating protein UBC5 [Saccharomyces cerevisiae S288C]
BK006947.3_mrna_5057	1911	3648.07	3430.93	-0.0885337	0.839368	*	0.701838	GO:0005576//extracellular region	GO:0004553//hydrolase activity, hydrolyzing O-glycosyl compounds;GO:0030246//carbohydrate binding;GO:0016787//hydrolase activity	GO:0005975//carbohydrate metabolic process	K19849//signaling mucin MSB2;K01183//chitinase [EC:3.2.1.14]	ORY49598.1//hypothetical protein BCR33DRAFT_763325 [Rhizoclosmatium globosum]
BK006947.3_mrna_5038	897	622.192	273.846	-1.184	1.56878e-07	Down	8.00801e-09	GO:0036396//RNA N6-methyladenosine methyltransferase complex;GO:0005730//nucleolus;GO:0005737//cytoplasm	NA	GO:0030435//sporulation resulting in formation of a cellular spore;GO:0051321//meiotic cell cycle;GO:2000221//negative regulation of pseudohyphal growth;GO:0080009//mRNA methylation	NA	NP_014203.1//Slz1p [Saccharomyces cerevisiae S288C]
BK006947.3_mrna_4978	1440	2834.3	3316.18	0.226528	0.334412	*	0.154226	GO:0031261//DNA replication preinitiation complex;GO:0000808//origin recognition complex;GO:0005634//nucleus;GO:0005656//nuclear pre-replicative complex;GO:0005664//nuclear origin of replication recognition complex	GO:0003688//DNA replication origin binding;GO:0005524//ATP binding	GO:0031938//regulation of chromatin silencing at telomere;GO:0006267//pre-replicative complex assembly involved in nuclear cell cycle DNA replication;GO:0030466//chromatin silencing at silent mating-type cassette;GO:0006260//DNA replication;GO:0006270//DNA replication initiation	K02607//origin recognition complex subunit 5	NP_014138.1//origin recognition complex subunit 5 [Saccharomyces cerevisiae S288C]
BK006945.2_mrna_3994	396	1801.47	1966.19	0.12623	0.591388	*	0.377828	GO:0000324//fungal-type vacuole	NA	GO:0030433//ubiquitin-dependent ERAD pathway	NA	NP_013205.1//Lcl2p [Saccharomyces cerevisiae S288C]
BK006934.2_mrna_2750	2880	1535.34	1635.41	0.0910918	0.714499	*	0.518027	GO:0032300//mismatch repair complex;GO:0005739//mitochondrion	GO:0032137//guanine/thymine mispair binding;GO:0032139//dinucleotide insertion or deletion binding;GO:0003684//damaged DNA binding;GO:0005524//ATP binding;GO:0030983//mismatched DNA binding;GO:0008094//DNA-dependent ATPase activity	GO:0006281//DNA repair;GO:0006298//mismatch repair;GO:0000002//mitochondrial genome maintenance;GO:0043504//mitochondrial DNA repair;GO:0007005//mitochondrion organization	K08736//DNA mismatch repair protein MSH3	NP_011988.1//mismatch repair ATPase MSH1 [Saccharomyces cerevisiae S288C]
BK006945.2_mrna_4186	195	888.937	1027.41	0.208861	0.464818	*	0.255325	GO:0005634//nucleus;GO:0005829//cytosol;GO:0005801//cis-Golgi network;GO:0005737//cytoplasm	GO:0005525//GTP binding;GO:0043024//ribosomal small subunit binding;GO:0003924//GTPase activity	GO:0032258//protein localization by the Cvt pathway;GO:0034497//protein localization to phagophore assembly site;GO:0042147//retrograde transport, endosome to Golgi;GO:0034629//cellular protein-containing complex localization;GO:0002181//cytoplasmic translation;GO:0006890//retrograde vesicle-mediated transport, Golgi to ER;GO:0000301//retrograde transport, vesicle recycling within Golgi	NA	NP_013364.1//Tma7p [Saccharomyces cerevisiae S288C]
BK006944.2_mrna_3796	2517	730.184	1023.05	0.486544	0.0579162	*	0.0132193	GO:0005634//nucleus;GO:0005739//mitochondrion;GO:0005737//cytoplasm	GO:0046872//metal ion binding;GO:0042781//3'-tRNA processing endoribonuclease activity	GO:0042780//tRNA 3'-end processing;GO:0072684//mitochondrial tRNA 3'-trailer cleavage, endonucleolytic;GO:0034414//tRNA 3'-trailer cleavage, endonucleolytic;GO:1990180//mitochondrial tRNA 3'-end processing;GO:0008033//tRNA processing	K00784//ribonuclease Z [EC:3.1.26.11]	NP_013005.1//tRNase Z [Saccharomyces cerevisiae S288C]
BK006949.2_mrna_5898	495	12.2026	11.8953	-0.0368026	0.970729	*	0.938351	GO:0009277//fungal-type cell wall;GO:0000324//fungal-type vacuole;GO:0005829//cytosol	GO:0005199//structural constituent of cell wall	GO:0031505//fungal-type cell wall organization	NA	NP_015041.1//seripauperin PAU22 [Saccharomyces cerevisiae S288C]
BK006948.2_mrna_5774	1287	2148.92	1582.77	-0.441163	0.0225014	*	0.00389773	GO:0005634//nucleus;GO:0005730//nucleolus;GO:0005829//cytosol;GO:0005739//mitochondrion;GO:0005737//cytoplasm	GO:0046872//metal ion binding;GO:0005524//ATP binding;GO:0052381//tRNA dimethylallyltransferase activity;GO:0000049//tRNA binding	GO:0006400//tRNA modification;GO:0061587//transfer RNA gene-mediated silencing;GO:0008033//tRNA processing	K00791//tRNA dimethylallyltransferase [EC:2.5.1.75]	NP_014917.3//tRNA dimethylallyltransferase [Saccharomyces cerevisiae S288C]
BK006942.2_mrna_2924	696	4321.12	3850.08	-0.166519	0.491004	*	0.280458	GO:0043231//intracellular membrane-bounded organelle;GO:0005938//cell cortex;GO:0005829//cytosol;GO:0005886//plasma membrane;GO:0005737//cytoplasm;GO:0032153//cell division site;GO:0005933//cellular bud	GO:0005525//GTP binding;GO:0019901//protein kinase binding;GO:0003924//GTPase activity	GO:0090338//positive regulation of formin-nucleated actin cable assembly;GO:0045921//positive regulation of exocytosis;GO:0008360//regulation of cell shape;GO:0032956//regulation of actin cytoskeleton organization;GO:0030950//establishment or maintenance of actin cytoskeleton polarity;GO:0007266//Rho protein signal transduction;GO:0007015//actin filament organization;GO:0030334//regulation of cel…	K07975//Rho family, other	NP_012148.1//Rho family GTPase RHO3 [Saccharomyces cerevisiae S288C]
BK006946.2_mrna_4531	1953	7694.17	7751.45	0.0106992	0.973036	*	0.94242	GO:0005634//nucleus;GO:0005737//cytoplasm	GO:0003677//DNA binding;GO:0003700//DNA-binding transcription factor activity	GO:1900101//regulation of endoplasmic reticulum unfolded protein response;GO:0042493//response to drug;GO:0046686//response to cadmium ion;GO:0043619//regulation of transcription from RNA polymerase II promoter in response to oxidative stress;GO:0000304//response to singlet oxygen;GO:0061395//positive regulation of transcription from RNA polymerase II promoter in response to arsenic-containing su…	K09043//AP-1-like transcription factor	NP_013707.1//DNA-binding transcription factor YAP1 [Saccharomyces cerevisiae S288C]
BK006941.2_mrna_2297	903	5954.16	6636.7	0.156568	0.617344	*	0.404193	GO:0005634//nucleus;GO:0005737//cytoplasm	GO:0000978//RNA polymerase II proximal promoter sequence-specific DNA binding;GO:0046872//metal ion binding;GO:0000981//DNA-binding transcription factor activity, RNA polymerase II-specific;GO:0003676//nucleic acid binding	GO:0071931//positive regulation of transcription involved in G1/S transition of mitotic cell cycle;GO:0000122//negative regulation of transcription by RNA polymerase II;GO:0045835//negative regulation of meiotic nuclear division;GO:0036095//positive regulation of invasive growth in response to glucose limitation by positive regulation of transcription from RNA polymerase II promoter;GO:0045944//p…	K09235//zinc finger protein RME1	NP_011558.1//Rme1p [Saccharomyces cerevisiae S288C]
BK006945.2_mrna_4161	2628	5047.77	4165.91	-0.277015	0.318728	*	0.143014	GO:0034272//phosphatidylinositol 3-kinase complex, class III, type II;GO:0016020//membrane;GO:0010008//endosome membrane;GO:0000329//fungal-type vacuole membrane;GO:0005777//peroxisome;GO:0071561//nucleus-vacuole junction;GO:0005737//cytoplasm;GO:0005768//endosome;GO:0034271//phosphatidylinositol 3-kinase complex, class III, type I;GO:0005829//cytosol;GO:0005794//Golgi apparatus;GO:0000407//phago…	GO:0005524//ATP binding;GO:0016303//1-phosphatidylinositol-3-kinase activity;GO:0004672//protein kinase activity	GO:2001159//regulation of protein localization by the Cvt pathway;GO:0006468//protein phosphorylation;GO:0036092//phosphatidylinositol-3-phosphate biosynthetic process;GO:0030242//autophagy of peroxisome;GO:0046854//phosphatidylinositol phosphorylation;GO:0016239//positive regulation of macroautophagy;GO:0032968//positive regulation of transcription elongation from RNA polymerase II promoter;GO:0…	K00914//phosphatidylinositol 3-kinase [EC:2.7.1.137]	NP_013341.1//phosphatidylinositol 3-kinase VPS34 [Saccharomyces cerevisiae S288C]
BK006941.2_mrna_2130	1875	2710.47	3391.97	0.323577	0.168518	*	0.0564924	GO:0005737//cytoplasm	GO:0043130//ubiquitin binding	NA	K18667//activating signal cointegrator complex subunit 2	NP_011405.1//Cue3p [Saccharomyces cerevisiae S288C]
BK006945.2_mrna_4340	5314	4397.19	3657.59	-0.265685	0.500527	*	0.288086	GO:0000943//retrotransposon nucleocapsid;GO:0005737//cytoplasm	GO:0003723//RNA binding	GO:0015074//DNA integration	K14835//25S rRNA (cytosine2870-C5)-methyltransferase [EC:2.1.1.310]	KOH47468.1//gag-pol fusion protein [Saccharomyces sp. 'boulardii']
BK006942.2_mrna_2980	468	931.354	996.394	0.0973864	0.835905	*	0.693672	GO:0005779//integral component of peroxisomal membrane;GO:0031307//integral component of mitochondrial outer membrane;GO:0016021//integral component of membrane;GO:0005777//peroxisome;GO:0005739//mitochondrion;GO:0005741//mitochondrial outer membrane	NA	GO:0007031//peroxisome organization;GO:0090141//positive regulation of mitochondrial fission;GO:0043653//mitochondrial fragmentation involved in apoptotic process;GO:0016559//peroxisome fission;GO:0000266//mitochondrial fission;GO:0001300//chronological cell aging;GO:0000422//autophagy of mitochondrion;GO:0006915//apoptotic process	K17969//mitochondrial fission 1 protein	NP_012199.3//Fis1p [Saccharomyces cerevisiae S288C]
BK006941.2_mrna_2059	660	511.432	416.764	-0.295311	0.479862	*	0.268011	GO:0005634//nucleus;GO:0000794//condensed nuclear chromosome	GO:0003690//double-stranded DNA binding	GO:0007131//reciprocal meiotic recombination	K22381//E3 ubiquitin-protein ligase ZNF598 [EC:2.3.2.27]	NP_011332.2//Mnd1p [Saccharomyces cerevisiae S288C]
BK006944.2_mrna_3759	816	6221.95	5208.53	-0.25649	0.396793	*	0.197965	GO:0005634//nucleus;GO:0005737//cytoplasm	GO:0050278//sedoheptulose-bisphosphatase activity;GO:0016491//oxidoreductase activity	GO:0042254//ribosome biogenesis;GO:0046390//ribose phosphate biosynthetic process;GO:0005975//carbohydrate metabolic process	K22315//sedoheptulose-bisphosphatase [EC:3.1.3.37]	NP_012969.1//sedoheptulose-bisphosphatase [Saccharomyces cerevisiae S288C]
BK006938.2_mrna_1165	1056	2837.06	3535.32	0.317444	0.211959	*	0.078895	GO:0043291//RAVE complex;GO:0005634//nucleus;GO:0031901//early endosome membrane	NA	GO:0032502//developmental process;GO:0043254//regulation of protein complex assembly;GO:0007035//vacuolar acidification;GO:0015031//protein transport	NA	NP_010488.1//Rav2p [Saccharomyces cerevisiae S288C]
BK006942.2_mrna_2869	4650	1243.21	1840.8	0.566269	0.00632982	*	0.000809369	GO:0010008//endosome membrane;GO:0005768//endosome;GO:0000324//fungal-type vacuole;GO:0005794//Golgi apparatus;GO:0016021//integral component of membrane	GO:0005048//signal sequence binding;GO:0000166//nucleotide binding	GO:0006896//Golgi to vacuole transport;GO:0006623//protein targeting to vacuole;GO:0015031//protein transport	K22832//1,3-beta-glucanosyltransferase GAS1 [EC:2.4.1.-]	NP_012095.1//signal sequence-binding protein [Saccharomyces cerevisiae S288C]
BK006937.2_mrna_653	1929	1768.24	1460.52	-0.275831	0.292836	*	0.126985	GO:0005938//cell cortex;GO:0000131//incipient cellular bud site;GO:0005935//cellular bud neck	GO:0005088//Ras guanyl-nucleotide exchange factor activity;GO:0005085//guanyl-nucleotide exchange factor activity	GO:0007121//bipolar cellular bud site selection;GO:0007264//small GTPase mediated signal transduction;GO:0007120//axial cellular bud site selection	K03099//son of sevenless	NP_009967.2//Ras family guanine nucleotide exchange factor BUD5 [Saccharomyces cerevisiae S288C]
BK006947.3_mrna_5292	1461	1323.63	2125.53	0.683327	0.0986445	*	0.027001	GO:0005634//nucleus;GO:0005654//nucleoplasm;GO:0005730//nucleolus;GO:0030687//preribosome, large subunit precursor	GO:0005525//GTP binding;GO:0070180//large ribosomal subunit rRNA binding;GO:0003924//GTPase activity	GO:0000055//ribosomal large subunit export from nucleus;GO:2000200//regulation of ribosomal subunit export from nucleus	K14537//nuclear GTP-binding protein	NP_014451.1//putative GTPase NOG2 [Saccharomyces cerevisiae S288C]
BK006941.2_mrna_2536	4140	4933.83	5321.97	0.109254	0.786462	*	0.613638	GO:0005634//nucleus;GO:0042406//extrinsic component of endoplasmic reticulum membrane;GO:0005829//cytosol	GO:0042393//histone binding;GO:0005524//ATP binding;GO:0003682//chromatin binding;GO:0016887//ATPase activity	GO:0000122//negative regulation of transcription by RNA polymerase II;GO:0045944//positive regulation of transcription by RNA polymerase II;GO:2000219//positive regulation of invasive growth in response to glucose limitation;GO:0031936//negative regulation of chromatin silencing	K22531//ATPase family AAA domain-containing protein 2 [EC:3.6.1.-];K14575//AAA family ATPase	NP_011786.1//Yta7p [Saccharomyces cerevisiae S288C]
BK006937.2_mrna_710	951	824.794	951.519	0.206199	0.553655	*	0.336471	GO:0005794//Golgi apparatus;GO:0016021//integral component of membrane	NA	NA	NA	NP_010024.1//hypothetical protein YCR100C [Saccharomyces cerevisiae S288C]
BK006947.3_mrna_5223	1362	6512.16	6450.07	-0.0138204	0.961369	*	0.91836	GO:0010494//cytoplasmic stress granule;GO:0005634//nucleus;GO:0000932//P-body;GO:0005737//cytoplasm	GO:0003723//RNA binding;GO:0003729//mRNA binding;GO:0008266//poly(U) RNA binding	GO:0034063//stress granule assembly;GO:0000184//nuclear-transcribed mRNA catabolic process, nonsense-mediated decay;GO:0043488//regulation of mRNA stability	K13201//nucleolysin TIA-1/TIAR	NP_014382.1//Pub1p [Saccharomyces cerevisiae S288C]
BK006944.2_mrna_3722	555	954.149	928.329	-0.0395781	0.919454	*	0.832218	GO:0000329//fungal-type vacuole membrane;GO:0034448//EGO complex;GO:0005829//cytosol;GO:0031902//late endosome membrane;GO:0071986//Ragulator complex	NA	GO:0072665//protein localization to vacuole;GO:0016197//endosomal transport;GO:0016237//lysosomal microautophagy;GO:0007035//vacuolar acidification;GO:0032008//positive regulation of TOR signaling;GO:0071230//cellular response to amino acid stimulus;GO:0042632//cholesterol homeostasis;GO:0043410//positive regulation of MAPK cascade;GO:0015031//protein transport;GO:0001919//regulation of receptor …	NA	NP_012932.1//Meh1p [Saccharomyces cerevisiae S288C]
BK006936.2_mrna_136	4509	3997.95	3964.87	-0.011986	0.978968	*	0.955538	GO:0005643//nuclear pore;GO:0031965//nuclear membrane;GO:0044611//nuclear pore inner ring;GO:0016021//integral component of membrane	GO:0003682//chromatin binding;GO:1990841//promoter-specific chromatin binding;GO:0017056//structural constituent of nuclear pore;GO:0044877//protein-containing complex binding	GO:0034398//telomere tethering at nuclear periphery;GO:0006342//chromatin silencing;GO:0016458//gene silencing;GO:0007059//chromosome segregation;GO:0000972//transcription-dependent tethering of RNA polymerase II gene DNA at nuclear periphery;GO:0016584//nucleosome positioning;GO:0051028//mRNA transport;GO:0036228//protein localization to nuclear inner membrane;GO:0006913//nucleocytoplasmic trans…	K14312//nuclear pore complex protein Nup155	NP_009474.1//Nup170p [Saccharomyces cerevisiae S288C]
BK006941.2_mrna_2385	2142	718.187	1254.1	0.804226	0.00867002	*	0.00119131	GO:0033553//rDNA heterochromatin;GO:0030686//90S preribosome;GO:0032040//small-subunit processome;GO:0005730//nucleolus;GO:0034455//t-UTP complex	GO:0030515//snoRNA binding;GO:0000049//tRNA binding	GO:0000462//maturation of SSU-rRNA from tricistronic rRNA transcript (SSU-rRNA, 5.8S rRNA, LSU-rRNA);GO:0006409//tRNA export from nucleus;GO:0045943//positive regulation of transcription by RNA polymerase I	K14547//U3 small nucleolar RNA-associated protein 8	NP_011644.3//Utp8p [Saccharomyces cerevisiae S288C]
BK006945.2_mrna_4129	894	3367.43	4420.28	0.392492	0.0501719	*	0.0110756	GO:0005774//vacuolar membrane;GO:0005829//cytosol;GO:0030127//COPII vesicle coat;GO:0035859//Seh1-associated complex;GO:0031080//nuclear pore outer ring;GO:0071944//cell periphery;GO:0005789//endoplasmic reticulum membrane;GO:0000139//Golgi membrane	GO:0005198//structural molecule activity	GO:1904263//positive regulation of TORC1 signaling;GO:0031081//nuclear pore distribution;GO:0030433//ubiquitin-dependent ERAD pathway;GO:0043547//positive regulation of GTPase activity;GO:0090114//COPII-coated vesicle budding;GO:0015031//protein transport;GO:0045893//positive regulation of transcription, DNA-templated;GO:0051028//mRNA transport	K14004//protein transport protein SEC13	NP_013309.1//GTPase-activating protein SEC13 [Saccharomyces cerevisiae S288C]
BK006948.2_mrna_5814	519	4764.03	20761.3	2.12364	3.66451e-22	Up	6.68506e-24	GO:0005840//ribosome;GO:0022625//cytosolic large ribosomal subunit	GO:0003735//structural constituent of ribosome	GO:0006412//translation;GO:0002181//cytoplasmic translation	K02882//large subunit ribosomal protein L18Ae	EDN64179.1//ribosomal protein L20A [Saccharomyces cerevisiae YJM789]
BK006943.2_mrna_3374	1494	4332.54	4278.53	-0.0180981	0.961369	*	0.918409	GO:0005774//vacuolar membrane;GO:0005887//integral component of plasma membrane;GO:0000324//fungal-type vacuole;GO:0016021//integral component of membrane;GO:0005937//mating projection	GO:0015079//potassium ion transmembrane transporter activity	GO:0071805//potassium ion transmembrane transport	NA	NP_012588.1//Kch1p [Saccharomyces cerevisiae S288C]
BK006939.2_mrna_1557	342	3713.48	5264.61	0.503557	0.00401737	*	0.000471999	GO:0005758//mitochondrial intermembrane space;GO:0070469//respiratory chain;GO:0005739//mitochondrion	GO:0009055//electron transfer activity;GO:0046872//metal ion binding;GO:0020037//heme binding	GO:0006123//mitochondrial electron transport, cytochrome c to oxygen;GO:0006122//mitochondrial electron transport, ubiquinol to cytochrome c	K08738//cytochrome c	NP_010875.1//cytochrome c isoform 2 [Saccharomyces cerevisiae S288C]
BK006946.2_mrna_4692	1287	2282.34	1513.88	-0.592259	0.0018877	*	0.000203461	GO:0000794//condensed nuclear chromosome	NA	GO:0007131//reciprocal meiotic recombination;GO:0042138//meiotic DNA double-strand break formation	NA	NP_013852.1//Rec114p [Saccharomyces cerevisiae S288C]
BK006939.2_mrna_1720	1539	2140.38	766.528	-1.48145	4.19599e-13	Down	1.39749e-14	GO:0005737//cytoplasm;GO:0005628//prospore membrane	GO:0008047//enzyme activator activity	GO:0006031//chitin biosynthetic process;GO:0030437//ascospore formation;GO:0071555//cell wall organization	K07126//uncharacterized protein	NP_011022.1//Shc1p [Saccharomyces cerevisiae S288C]
BK006949.2_mrna_6000	1521	3165.93	3152	-0.00636242	0.984855	*	0.967703	GO:0005634//nucleus;GO:0032221//Rpd3S complex;GO:0033698//Rpd3L complex;GO:0070210//Rpd3L-Expanded complex	GO:0046872//metal ion binding;GO:0035064//methylated histone binding;GO:0008134//transcription factor binding	GO:0061186//negative regulation of chromatin silencing at silent mating-type cassette;GO:0030174//regulation of DNA-dependent DNA replication initiation;GO:0061188//negative regulation of chromatin silencing at rDNA;GO:0006325//chromatin organization;GO:0031939//negative regulation of chromatin silencing at telomere;GO:0045893//positive regulation of transcription, DNA-templated	K07117//uncharacterized protein;K11294//nucleolin	NP_015144.1//Cti6p [Saccharomyces cerevisiae S288C]
BK006949.2_mrna_6139	2397	3125.59	3408.39	0.124963	0.663317	*	0.457495	GO:0005768//endosome;GO:0000329//fungal-type vacuole membrane;GO:0030897//HOPS complex;GO:0005829//cytosol;GO:0005737//cytoplasm;GO:0033263//CORVET complex	GO:0003779//actin binding	GO:0016197//endosomal transport;GO:0006895//Golgi to endosome transport;GO:0042144//vacuole fusion, non-autophagic;GO:0045324//late endosome to vacuole transport;GO:0006886//intracellular protein transport;GO:0099022//vesicle tethering;GO:0006623//protein targeting to vacuole;GO:0007033//vacuole organization;GO:0035542//regulation of SNARE complex assembly;GO:0032889//regulation of vacuole fusion…	K20180//vacuolar protein sorting-associated protein 16	NP_015280.1//tethering complex subunit VPS16 [Saccharomyces cerevisiae S288C]
BK006942.2_mrna_2906	204	4.60401	2.99137	-0.622084	0.424579	*	0.219289	GO:0016021//integral component of membrane	NA	NA	NA	NP_878096.1//hypothetical protein YIL134C-A [Saccharomyces cerevisiae S288C]
BK006947.3_mrna_4977	6669	2126.19	1607.22	-0.403704	0.188533	*	0.0661997	GO:0008622//epsilon DNA polymerase complex;GO:0005657//replication fork	GO:0003729//mRNA binding;GO:0003677//DNA binding;GO:0008310//single-stranded DNA 3'-5' exodeoxyribonuclease activity;GO:0003690//double-stranded DNA binding;GO:0003887//DNA-directed DNA polymerase activity;GO:0003697//single-stranded DNA binding;GO:0000166//nucleotide binding;GO:0008270//zinc ion binding;GO:0051539//4 iron, 4 sulfur cluster binding	GO:0000278//mitotic cell cycle;GO:0006284//base-excision repair;GO:0006260//DNA replication;GO:0045004//DNA replication proofreading;GO:0006302//double-strand break repair;GO:0031573//intra-S DNA damage checkpoint;GO:0007064//mitotic sister chromatid cohesion;GO:0006272//leading strand elongation;GO:0006281//DNA repair;GO:0006287//base-excision repair, gap-filling;GO:0070868//heterochromatin orga…	K02324//DNA polymerase epsilon subunit 1 [EC:2.7.7.7]	NP_014137.1//DNA polymerase epsilon catalytic subunit [Saccharomyces cerevisiae S288C]
BK006936.2_mrna_496	600	2553.38	1974.94	-0.370601	0.0549469	*	0.012378	GO:0000329//fungal-type vacuole membrane;GO:0005886//plasma membrane;GO:0005737//cytoplasm	GO:0019001//guanyl nucleotide binding;GO:0005525//GTP binding;GO:0003924//GTPase activity	GO:0006886//intracellular protein transport;GO:0006623//protein targeting to vacuole;GO:0032482//Rab protein signal transduction;GO:0006897//endocytosis;GO:0007030//Golgi organization	K07976//Rab family, other;K07889//Ras-related protein Rab-5C	NP_009823.2//Rab family GTPase YPT10 [Saccharomyces cerevisiae S288C]
BK006941.2_mrna_2308	2787	2280.62	2160.69	-0.0779336	0.86818	*	0.744092	GO:0016586//RSC-type complex	GO:0015616//DNA translocase activity;GO:0003682//chromatin binding	GO:0006368//transcription elongation from RNA polymerase II promoter;GO:0006302//double-strand break repair;GO:0030435//sporulation resulting in formation of a cellular spore;GO:0006338//chromatin remodeling;GO:0043044//ATP-dependent chromatin remodeling;GO:0042173//regulation of sporulation resulting in formation of a cellular spore;GO:0006303//double-strand break repair via nonhomologous end jo…	K11756//chromatin structure-remodeling complex subunit RSC1/2	NP_011570.1//RSC subunit protein RSC1 [Saccharomyces cerevisiae S288C]
BK006934.2_mrna_2834	966	2850.69	3230.46	0.180432	0.430988	*	0.225052	GO:0034399//nuclear periphery;GO:0019031//viral envelope;GO:0005635//nuclear envelope;GO:0016021//integral component of membrane;GO:0071561//nucleus-vacuole junction;GO:0005640//nuclear outer membrane	NA	GO:0071562//nucleus-vacuole junction assembly;GO:0006914//autophagy;GO:0034613//cellular protein localization;GO:0034727//piecemeal microautophagy of the nucleus	K22264//nucleus-vacuole junction protein 1	NP_012065.3//Nvj1p [Saccharomyces cerevisiae S288C]
BK006945.2_mrna_4345	2028	355.572	443.727	0.319532	0.4381	*	0.231143	GO:0000324//fungal-type vacuole;GO:0016021//integral component of membrane;GO:0071944//cell periphery;GO:0005886//plasma membrane;GO:0051285//cell cortex of cell tip	NA	GO:0031505//fungal-type cell wall organization	K11245//mating pheromone-induced death protein 2;K01183//chitinase [EC:3.2.1.14]	NP_013517.1//Ina1p [Saccharomyces cerevisiae S288C]
BK006940.2_mrna_1970	825	4660.1	4556.14	-0.0325471	0.938833	*	0.872562	GO:0034399//nuclear periphery;GO:0008541//proteasome regulatory particle, lid subcomplex;GO:0005829//cytosol;GO:0005838//proteasome regulatory particle;GO:0000790//nuclear chromatin;GO:0034515//proteasome storage granule	NA	GO:0006508//proteolysis;GO:0006511//ubiquitin-dependent protein catabolic process;GO:0043161//proteasome-mediated ubiquitin-dependent protein catabolic process	K03031//26S proteasome regulatory subunit N12	NP_116710.1//proteasome regulatory particle lid subunit RPN12 [Saccharomyces cerevisiae S288C]
BK006942.2_mrna_3027	480	906.071	963.116	0.088086	0.748784	*	0.559677	GO:0016020//membrane;GO:0031965//nuclear membrane;GO:0005635//nuclear envelope;GO:0016021//integral component of membrane;GO:0005739//mitochondrion;GO:0005789//endoplasmic reticulum membrane	GO:0043022//ribosome binding;GO:0051087//chaperone binding	GO:0006457//protein folding;GO:0006999//nuclear pore organization	K14017//HSP70 co-chaperone SNL1	NP_012248.1//Snl1p [Saccharomyces cerevisiae S288C]
BK006943.2_mrna_3380	651	2067.3	2462.15	0.252168	0.254091	*	0.102692	GO:0005634//nucleus;GO:0005829//cytosol;GO:0005737//cytoplasm	GO:0004798//thymidylate kinase activity;GO:0009041//uridylate kinase activity;GO:0005524//ATP binding;GO:0004550//nucleoside diphosphate kinase activity	GO:0006165//nucleoside diphosphate phosphorylation;GO:0006233//dTDP biosynthetic process;GO:0006235//dTTP biosynthetic process;GO:0006227//dUDP biosynthetic process	K00943//dTMP kinase [EC:2.7.4.9]	NP_012591.1//bifunctional thymidylate/uridylate kinase [Saccharomyces cerevisiae S288C]
BK006938.2_mrna_740	1656	3023.75	4089.04	0.435426	0.0179077	*	0.00289362	GO:0031105//septin complex;GO:0015630//microtubule cytoskeleton;GO:0005829//cytosol;GO:0043332//mating projection tip;GO:0005940//septin ring;GO:0005935//cellular bud neck;GO:0005628//prospore membrane;GO:0000144//cellular bud neck septin ring	GO:0032947//protein-containing complex scaffold activity;GO:0005525//GTP binding;GO:0003924//GTPase activity	GO:0097271//protein localization to bud neck;GO:0000915//actomyosin contractile ring assembly;GO:0061163//endoplasmic reticulum polarization;GO:0061640//cytoskeleton-dependent cytokinesis;GO:0032186//cellular bud neck septin ring organization;GO:0010458//exit from mitosis;GO:0000082//G1/S transition of mitotic cell cycle;GO:0000921//septin ring assembly;GO:0000917//division septum assembly	K16946//seventh homolog of septin 1	NP_010056.1//septin SHS1 [Saccharomyces cerevisiae S288C]
BK006934.2_mrna_2784	2205	2228.54	1825.29	-0.28797	0.166243	*	0.0555626	GO:0016021//integral component of membrane;GO:0000131//incipient cellular bud site;GO:0005934//cellular bud tip;GO:0071944//cell periphery;GO:0005935//cellular bud neck	NA	GO:1902413//negative regulation of mitotic cytokinesis	K18637//axial budding pattern protein 2	NP_012019.1//Skg6p [Saccharomyces cerevisiae S288C]
BK006948.2_mrna_5760	1737	3365.82	2992.25	-0.169724	0.574347	*	0.357201	GO:0005851//eukaryotic translation initiation factor 2B complex;GO:0005829//cytosol;GO:0032045//guanyl-nucleotide exchange factor complex	GO:0003743//translation initiation factor activity;GO:0005085//guanyl-nucleotide exchange factor activity	GO:0006446//regulation of translational initiation;GO:1903574//negative regulation of cellular response to amino acid starvation	K03241//translation initiation factor eIF-2B subunit gamma	NP_014903.1//translation initiation factor eIF2B subunit gamma [Saccharomyces cerevisiae S288C]
BK006945.2_mrna_3830	975	8821.42	12606	0.515023	0.323657	*	0.146497	GO:0005737//cytoplasm	GO:0008898//S-adenosylmethionine-homocysteine S-methyltransferase activity;GO:0008270//zinc ion binding;GO:0047150//betaine-homocysteine S-methyltransferase activity	GO:0046498//S-adenosylhomocysteine metabolic process;GO:0050667//homocysteine metabolic process;GO:0019284//L-methionine salvage from S-adenosylmethionine;GO:0000096//sulfur amino acid metabolic process;GO:0009086//methionine biosynthetic process	K00547//homocysteine S-methyltransferase [EC:2.1.1.10]	NP_013038.1//S-adenosylmethionine-homocysteine S-methyltransferase MHT1 [Saccharomyces cerevisiae S288C]
BK006946.2_mrna_4646	1542	745.989	1306.49	0.808474	0.0101465	*	0.00144514	GO:0033553//rDNA heterochromatin;GO:0005654//nucleoplasm;GO:0030686//90S preribosome;GO:0032040//small-subunit processome;GO:0005730//nucleolus;GO:0034455//t-UTP complex	GO:0030515//snoRNA binding	GO:0031167//rRNA methylation;GO:0000462//maturation of SSU-rRNA from tricistronic rRNA transcript (SSU-rRNA, 5.8S rRNA, LSU-rRNA);GO:0045943//positive regulation of transcription by RNA polymerase I;GO:0006364//rRNA processing	K14549//U3 small nucleolar RNA-associated protein 15	NP_013811.1//snoRNA-binding rRNA-processing protein UTP15 [Saccharomyces cerevisiae S288C]
BK006939.2_mrna_1636	1254	2874.3	3176.01	0.144006	0.558205	*	0.340902	GO:0031588//nucleotide-activated protein kinase complex;GO:0005634//nucleus;GO:0005641//nuclear envelope lumen;GO:0005737//cytoplasm	GO:0019901//protein kinase binding	GO:0045859//regulation of protein kinase activity;GO:0001403//invasive growth in response to glucose limitation;GO:0007155//cell adhesion;GO:0007165//signal transduction;GO:0043254//regulation of protein complex assembly;GO:0006468//protein phosphorylation;GO:2000222//positive regulation of pseudohyphal growth	K07199//5'-AMP-activated protein kinase, regulatory beta subunit	NP_010944.1//Gal83p [Saccharomyces cerevisiae S288C]
BK006946.2_mrna_4688	4014	3560.12	3805.21	0.0960478	0.750755	*	0.562022	GO:0005643//nuclear pore;GO:0031965//nuclear membrane;GO:0071944//cell periphery;GO:0034399//nuclear periphery;GO:0016021//integral component of membrane;GO:0005739//mitochondrion;GO:0070762//nuclear pore transmembrane ring;GO:0005641//nuclear envelope lumen	GO:0043495//protein membrane anchor;GO:0017056//structural constituent of nuclear pore	GO:0006913//nucleocytoplasmic transport;GO:0030474//spindle pole body duplication;GO:0006606//protein import into nucleus;GO:0006999//nuclear pore organization;GO:0051028//mRNA transport	K18725//nucleoporin POM152	NP_013848.1//Pom152p [Saccharomyces cerevisiae S288C]
BK006936.2_mrna_321	330	509.033	806.804	0.664459	0.00552202	*	0.000688519	GO:0005758//mitochondrial intermembrane space;GO:0005743//mitochondrial inner membrane;GO:0016021//integral component of membrane;GO:0042721//TIM22 mitochondrial import inner membrane insertion complex;GO:0005739//mitochondrion	GO:0008320//protein transmembrane transporter activity;GO:0046872//metal ion binding;GO:0008565//protein transporter activity;GO:0005543//phospholipid binding	GO:0071806//protein transmembrane transport;GO:0045039//protein import into mitochondrial inner membrane	K17793//mitochondrial import inner membrane translocase subunit TIM12	NP_009649.1//Tim12p [Saccharomyces cerevisiae S288C]
BK006943.2_mrna_3155	2493	21145.9	15909.4	-0.410496	0.113995	*	0.033006	GO:0005634//nucleus;GO:0043332//mating projection tip;GO:0005737//cytoplasm;GO:0120171//Cdc24p-Far1p-Gbetagamma complex	GO:0046872//metal ion binding;GO:0004861//cyclin-dependent protein serine/threonine kinase inhibitor activity	GO:0051301//cell division;GO:0000751//mitotic cell cycle G1 arrest in response to pheromone;GO:0043577//chemotropism;GO:0051457//maintenance of protein location in nucleus	K06652//cyclin-dependent kinase inhibitor FAR1	NP_012378.1//cyclin-dependent protein serine/threonine kinase inhibiting protein FAR1 [Saccharomyces cerevisiae S288C]
BK006942.2_mrna_3018	3453	5510.11	4259.7	-0.371328	0.140607	*	0.0441181	GO:0005634//nucleus;GO:0034990//nuclear mitotic cohesin complex;GO:0005829//cytosol;GO:0000785//chromatin;GO:0005737//cytoplasm;GO:0000775//chromosome, centromeric region;GO:0008278//cohesin complex	GO:0003682//chromatin binding	GO:0007062//sister chromatid cohesion;GO:0051301//cell division;GO:0006473//protein acetylation;GO:0007064//mitotic sister chromatid cohesion	K06671//cohesin complex subunit SA-1/2	NP_012238.1//Irr1p [Saccharomyces cerevisiae S288C]
BK006945.2_mrna_4034	2058	2143.84	1784.27	-0.264865	0.182342	*	0.0628966	GO:0005737//cytoplasm	GO:0005524//ATP binding;GO:0017178//diphthine-ammonia ligase activity	GO:0017183//peptidyl-diphthamide biosynthetic process from peptidyl-histidine	K06927//diphthine-ammonia ligase [EC:6.3.1.14]	NP_013244.1//diphthine--ammonia ligase [Saccharomyces cerevisiae S288C]
BK006941.2_mrna_2159	2415	2113.1	2177.07	0.0430278	0.921295	*	0.835598	GO:0005829//cytosol	GO:0005524//ATP binding;GO:0004672//protein kinase activity	NA	K17541//SCY1-like protein 2	NP_011432.1//Scy1p [Saccharomyces cerevisiae S288C]
BK006949.2_mrna_6226	3228	1607.12	1073.8	-0.581752	0.0978404	*	0.0267076	GO:0005737//cytoplasm	GO:0003723//RNA binding;GO:0003729//mRNA binding	GO:0000288//nuclear-transcribed mRNA catabolic process, deadenylation-dependent decay	K17974//protein JSN1	NP_015367.1//Puf2p [Saccharomyces cerevisiae S288C]
BK006938.2_mrna_796	594	494.572	492.323	-0.00657283	0.989901	*	0.977144	GO:0010494//cytoplasmic stress granule;GO:0005634//nucleus;GO:0005737//cytoplasm	GO:0005524//ATP binding;GO:0004017//adenylate kinase activity;GO:0016887//ATPase activity	GO:0000462//maturation of SSU-rRNA from tricistronic rRNA transcript (SSU-rRNA, 5.8S rRNA, LSU-rRNA);GO:0034599//cellular response to oxidative stress;GO:0006364//rRNA processing	K18532//adenylate kinase [EC:2.7.4.3]	NP_010115.1//nucleoside-triphosphatase [Saccharomyces cerevisiae S288C]
BK006936.2_mrna_405	1719	422.932	497.144	0.233238	0.616317	*	0.402695	GO:0005887//integral component of plasma membrane;GO:0016021//integral component of membrane;GO:0071944//cell periphery;GO:0005628//prospore membrane	GO:0015238//drug transmembrane transporter activity;GO:0005275//amine transmembrane transporter activity	GO:0030476//ascospore wall assembly;GO:0055085//transmembrane transport;GO:0006855//drug transmembrane transport;GO:0015837//amine transport	K17617//CTD nuclear envelope phosphatase 1 [EC:3.1.3.16];K08157//MFS transporter, DHA1 family, multidrug resistance protein;K01556//kynureninase [EC:3.7.1.3]	NP_009739.1//Dtr1p [Saccharomyces cerevisiae S288C]
BK006948.2_mrna_5748	633	8090.75	4964.29	-0.704686	0.283763	*	0.121959	GO:0009277//fungal-type cell wall;GO:0009986//cell surface;GO:0000324//fungal-type vacuole;GO:0005576//extracellular region;GO:0005934//cellular bud tip;GO:0071944//cell periphery;GO:0005737//cytoplasm	GO:0016787//hydrolase activity	GO:0031505//fungal-type cell wall organization;GO:0006139//nucleobase-containing compound metabolic process	K11244//cell wall integrity and stress response component;K01183//chitinase [EC:3.2.1.14]	NP_014890.1//Srl1p [Saccharomyces cerevisiae S288C]
BK006944.2_mrna_3656	504	6432.73	7844.49	0.286248	0.418635	*	0.215238	GO:0010494//cytoplasmic stress granule;GO:0005874//microtubule;GO:0005829//cytosol;GO:0005739//mitochondrion;GO:0005737//cytoplasm	GO:0005509//calcium ion binding;GO:0043023//ribosomal large subunit binding;GO:0043024//ribosomal small subunit binding	GO:0034599//cellular response to oxidative stress;GO:0002181//cytoplasmic translation	NA	NP_012867.1//Tma19p [Saccharomyces cerevisiae S288C]
BK006940.2_mrna_1966	1989	2112.99	2265.94	0.100823	0.705927	*	0.50651	GO:0005783//endoplasmic reticulum;GO:0016021//integral component of membrane;GO:0005737//cytoplasm	NA	GO:0030435//sporulation resulting in formation of a cellular spore;GO:0051321//meiotic cell cycle	NA	NP_683716.1//Rmd8p [Saccharomyces cerevisiae S288C]
BK006947.3_mrna_5146	2493	5627.05	7187.34	0.35308	0.043365	*	0.00910669	GO:0010494//cytoplasmic stress granule;GO:0034399//nuclear periphery;GO:0000932//P-body;GO:0005737//cytoplasm;GO:0005844//polysome	GO:0004520//endodeoxyribonuclease activity;GO:0008233//peptidase activity;GO:0048256//flap endonuclease activity;GO:0017108//5'-flap endonuclease activity;GO:0004518//nuclease activity	GO:0006281//DNA repair;GO:0044419//interspecies interaction between organisms;GO:0006974//cellular response to DNA damage stimulus	NA	NP_014314.3//Mkt1p [Saccharomyces cerevisiae S288C]
BK006945.2_mrna_4021	1269	4378.73	7383.43	0.753779	8.49492e-05	*	6.61111e-06	GO:0005783//endoplasmic reticulum;GO:0016021//integral component of membrane;GO:0005886//plasma membrane	GO:0000007//low-affinity zinc ion transmembrane transporter activity;GO:0005385//zinc ion transmembrane transporter activity	GO:0071578//zinc ion import across plasma membrane;GO:0071577//zinc ion transmembrane transport	K14709//solute carrier family 39 (zinc transporter), member 1/2/3	NP_013231.1//low-affinity Zn(2+) transporter ZRT2 [Saccharomyces cerevisiae S288C]
BK006944.2_mrna_3631	2208	78.3384	66.9411	-0.226828	0.656832	*	0.448606	GO:0005654//nucleoplasm;GO:0005730//nucleolus	GO:0003723//RNA binding;GO:0034459//ATP-dependent 3'-5' RNA helicase activity;GO:0005524//ATP binding;GO:0003724//RNA helicase activity;GO:0042802//identical protein binding;GO:0004386//helicase activity;GO:0003676//nucleic acid binding	GO:0031167//rRNA methylation;GO:0042254//ribosome biogenesis;GO:0000462//maturation of SSU-rRNA from tricistronic rRNA transcript (SSU-rRNA, 5.8S rRNA, LSU-rRNA);GO:0045943//positive regulation of transcription by RNA polymerase I	K14781//ATP-dependent RNA helicase DHR2 [EC:3.6.4.13]	NP_012845.1//RNA helicase [Saccharomyces cerevisiae S288C]
BK006942.2_mrna_3025	765	3468.36	15124.4	2.12456	3.43464e-22	Up	6.20821e-24	GO:0005840//ribosome;GO:0022625//cytosolic large ribosomal subunit	GO:0003735//structural constituent of ribosome;GO:0019843//rRNA binding	GO:0006412//translation;GO:0002181//cytoplasmic translation	K02938//large subunit ribosomal protein L8e	NP_012246.1//ribosomal 60S subunit protein L2B [Saccharomyces cerevisiae S288C]
BK006945.2_ncrna_3918	606	101.161	124.919	0.304345	0.464284	*	0.254793	NA	NA	NA	NA	EGA81782.1//hypothetical protein QA23_3125 [Saccharomyces cerevisiae Lalvin QA23]
BK006948.2_mrna_5684	1188	24534.3	38234.7	0.640084	0.00106593	*	0.000105077	GO:0005737//cytoplasm	GO:0004648//O-phospho-L-serine:2-oxoglutarate aminotransferase activity	GO:0009113//purine nucleobase biosynthetic process;GO:0006564//L-serine biosynthetic process;GO:0009070//serine family amino acid biosynthetic process	K00831//phosphoserine aminotransferase [EC:2.6.1.52]	NP_014827.3//O-phospho-L-serine:2-oxoglutarate transaminase [Saccharomyces cerevisiae S288C]
BK006940.2_mrna_1832	483	52.7517	55.0492	0.0615031	0.947764	*	0.892246	GO:0005739//mitochondrion	GO:0005524//ATP binding;GO:0004386//helicase activity;GO:0003676//nucleic acid binding	NA	NA	CAA90549.1//unknown [Saccharomyces cerevisiae]
BK006945.2_mrna_3833	1728	4443.51	5678.2	0.353734	0.24403	*	0.0963869	NA	GO:0030170//pyridoxal phosphate binding;GO:0003962//cystathionine gamma-synthase activity	GO:0006790//sulfur compound metabolic process;GO:0019346//transsulfuration;GO:0009086//methionine biosynthetic process	K01739//cystathionine gamma-synthase [EC:2.5.1.48]	NP_013042.1//cystathionine gamma-synthase [Saccharomyces cerevisiae S288C]
BK006938.2_mrna_753	1119	933.438	875.609	-0.0922671	0.785191	*	0.611511	GO:0005774//vacuolar membrane;GO:0000324//fungal-type vacuole;GO:0016021//integral component of membrane	NA	NA	K11244//cell wall integrity and stress response component;K01183//chitinase [EC:3.2.1.14]	NP_010070.1//hypothetical protein YDL211C [Saccharomyces cerevisiae S288C]
BK006938.2_mrna_1385	4590	2421.54	1996.74	-0.278281	0.387313	*	0.191725	GO:0016021//integral component of membrane;GO:0071944//cell periphery;GO:0005886//plasma membrane	GO:0005524//ATP binding;GO:0042626//ATPase activity, coupled to transmembrane movement of substances	GO:0055085//transmembrane transport;GO:0042493//response to drug;GO:0046618//drug export	K08711//ATP-binding cassette, subfamily G (WHITE), member 2, PDR	NP_010694.1//ATP-binding cassette multidrug transporter PDR15 [Saccharomyces cerevisiae S288C]
BK006943.2_mrna_3456	3147	1217.97	1597.23	0.391089	0.130124	*	0.0393531	GO:0005634//nucleus;GO:0034399//nuclear periphery;GO:0005635//nuclear envelope;GO:0005829//cytosol;GO:0016021//integral component of membrane;GO:0005737//cytoplasm	GO:0008536//Ran GTPase binding;GO:0008565//protein transporter activity	GO:0006886//intracellular protein transport;GO:0006606//protein import into nucleus	K20223//importin-7	NP_012666.2//Nmd5p [Saccharomyces cerevisiae S288C]
BK006939.2_mrna_1567	1935	1162.6	1330.46	0.194573	0.487205	*	0.274707	GO:0042645//mitochondrial nucleoid	GO:0005524//ATP binding;GO:0051082//unfolded protein binding	GO:0006457//protein folding;GO:0006626//protein targeting to mitochondrion;GO:0042026//protein refolding	K04043//molecular chaperone DnaK	EJT44839.1//ECM10-like protein [Saccharomyces kudriavzevii IFO 1802]
BK006948.2_mrna_5884	615	991.046	409.202	-1.27614	1.95716e-06	Down	1.18248e-07	NA	NA	NA	K22020//mucin-19	AJT87473.1//Fit3p [Saccharomyces cerevisiae YJM1083]
BK006945.2_mrna_4163	966	533.017	601.903	0.175349	0.590072	*	0.375509	GO:0005783//endoplasmic reticulum;GO:0005794//Golgi apparatus;GO:0032541//cortical endoplasmic reticulum;GO:0016021//integral component of membrane;GO:0005789//endoplasmic reticulum membrane;GO:0000139//Golgi membrane	NA	GO:0006506//GPI anchor biosynthetic process;GO:0030148//sphingolipid biosynthetic process;GO:0035621//ER to Golgi ceramide transport;GO:0035376//sterol import;GO:0006665//sphingolipid metabolic process;GO:0006897//endocytosis;GO:0097036//regulation of plasma membrane sterol distribution;GO:0016125//sterol metabolic process;GO:0032366//intracellular sterol transport	K21848//lipid intermediate transporter	NP_013343.1//sterol homeostasis protein ARV1 [Saccharomyces cerevisiae S288C]
BK006944.2_mrna_3612	279	10627.1	9168.8	-0.21294	0.424899	*	0.220144	GO:0009277//fungal-type cell wall;GO:0005618//cell wall;GO:0005829//cytosol;GO:0005576//extracellular region;GO:0031225//anchored component of membrane	GO:0005199//structural constituent of cell wall	GO:0031505//fungal-type cell wall organization	NA	NP_012826.1//Cwp2p [Saccharomyces cerevisiae S288C]
BK006936.2_mrna_183	1017	624.733	683.464	0.129626	0.716305	*	0.520366	GO:0005880//nuclear microtubule;GO:0000235//astral microtubule;GO:0015630//microtubule cytoskeleton;GO:0005819//spindle;GO:0005737//cytoplasm;GO:0005935//cellular bud neck	GO:0008017//microtubule binding	GO:2000575//negative regulation of microtubule motor activity;GO:0007059//chromosome segregation;GO:0000022//mitotic spindle elongation;GO:0051301//cell division;GO:0007049//cell cycle	NA	NP_009522.1//She1p [Saccharomyces cerevisiae S288C]
BK006948.2_mrna_5608	1815	9171.3	7389.92	-0.311568	0.211592	*	0.0786519	GO:0005739//mitochondrion	GO:0003852//2-isopropylmalate synthase activity	GO:0009098//leucine biosynthetic process	K01649//2-isopropylmalate synthase [EC:2.3.3.13]	NP_014751.1//2-isopropylmalate synthase LEU9 [Saccharomyces cerevisiae S288C]
[truncated: 5,193 more rows]
